# Supplementary material for: The Human Blood Metabolome-Transcriptome Interface
Source: PLOS journal article supplement (doi:10.1371/journal.pgen.1005274), 2015-06-18

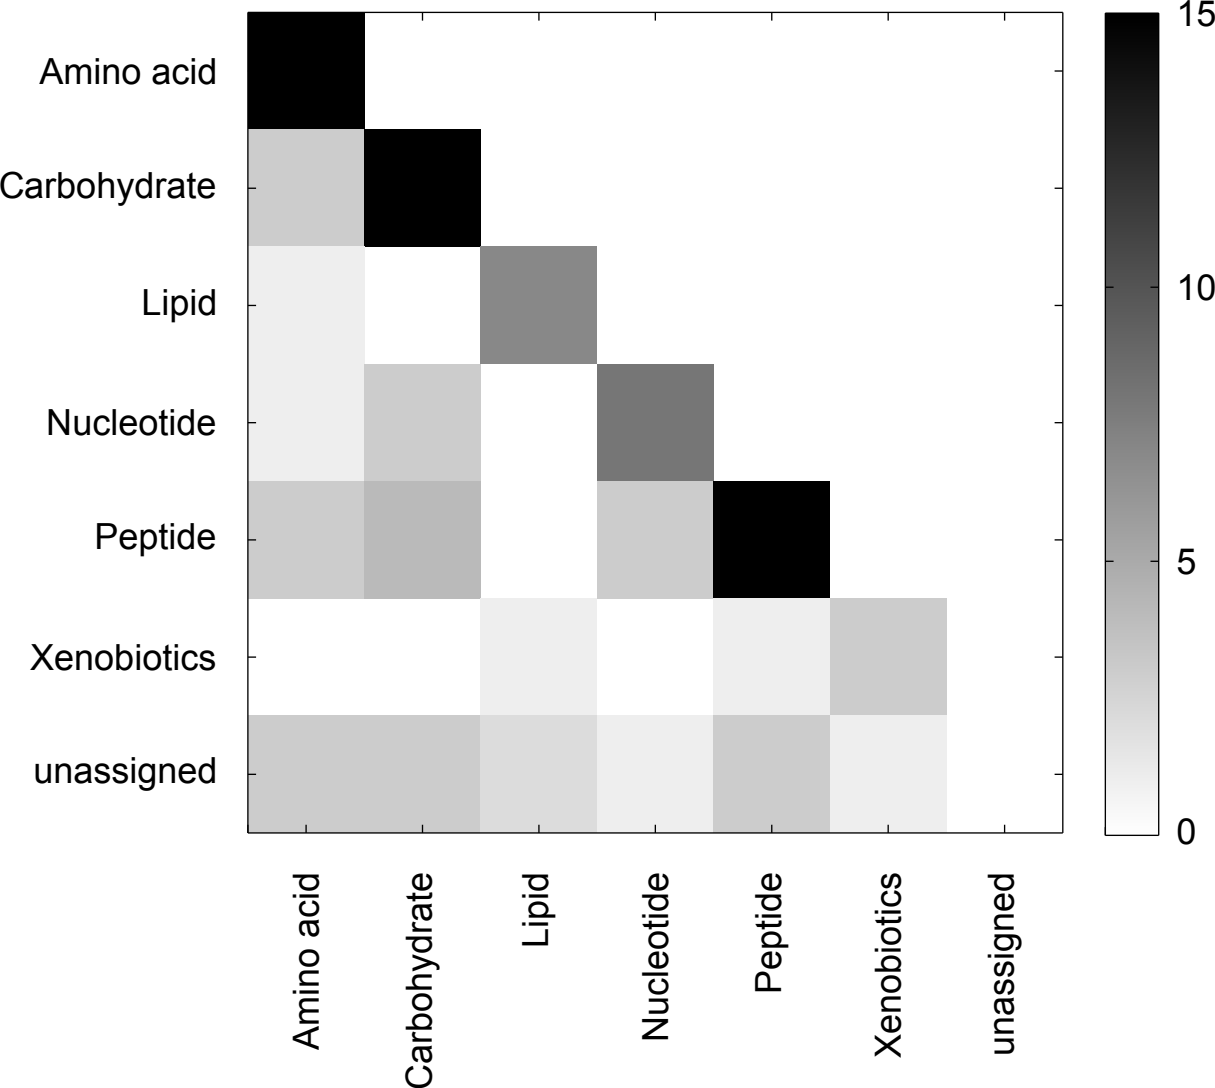

Supplement: S9 (10.1371/journal.pgen.1005274.s009) [file journal.pgen.1005274.s009]
