# Supplementary material for: The Human Blood Metabolome-Transcriptome Interface
Source: PLoS Genet. 2015 Jun 18;11(6):e1005274. doi: 10.1371/journal.pgen.1005274 (PMC4473262; doi:10.1371/journal.pgen.1005274)
Supplement: S9 Table — (XLSX) [file pgen.1005274.s021.xlsx]

## Sheet: HDL-C metabolites
Metabolite	p-value	beta	Metabolite in BMTI?
X-05907	3.16312e-22	4.70401	no
X-10419	6.32171e-22	4.63726	no
X-10395	1.45705e-19	4.37588	no
isoleucine	5.80893e-19	-4.3063	yes
@2linoleoylglycerophosphocholine	9.42014e-19	4.3624	no
@1linoleoylglycerophosphocholine	1.06808e-16	4.03633	yes
X-10500	1.73753e-16	4.00401	no
valine	5.12986e-14	-3.67308	yes
X-06227	6.87592e-14	3.74644	no
glutamate	8.79005e-14	-3.63996	yes
leucine	1.13399e-13	-3.62417	yes
X-13496	2.81811e-13	3.66632	no
@2oleoylglycerophosphocholine	4.60634e-13	3.5511	no
@1oleoylglycerophosphocholine	9.36896e-13	3.49019	no
phosphate	1.97075e-12	3.44162	no
kynurenine	2.99843e-12	-3.41388	yes
X-11444	3.37295e-12	-3.3821	yes
X-12063	4.6937e-12	-3.44734	yes
@1oleoylglycerol1monoolein	7.30439e-12	-3.42237	yes
gammaglutamylvaline	1.02485e-10	-3.18196	yes
@5dodecenoate121n7	1.81161e-10	3.14935	yes
X-10510	2.78544e-10	3.09688	no
X-10429	3.59204e-10	3.63298	no
gammaglutamylleucine	3.91182e-10	-3.0717	yes
acetylphosphate	2.78395e-09	2.92165	no
glycerol3phosphateG3P	3.50427e-09	2.90352	no
urate	5.00597e-09	-2.87518	yes
cholesterol	6.95356e-09	2.8488	no
X-14056	8.70927e-09	-2.83059	no
succinylcarnitine	9.2125e-09	-2.88391	no
@1eicosadienoylglycerophosphocholine	9.96999e-09	2.89373	no
gammaglutamylphenylalanine	1.13829e-08	-2.81636	yes
propionylcarnitine	1.47719e-08	-2.78735	yes
X-12038	2.1558e-08	2.76747	yes
X-08402	3.66177e-08	2.72484	no
pseudouridine	5.84253e-08	-2.67143	yes
X-12456	9.6943e-08	-2.88205	no
caprate100	1.19873e-07	2.60874	yes
Nacetylglycine	1.35054e-07	2.84417	yes
@1linoleoylglycerol1monolinolein	1.73445e-07	-2.57192	yes
X-11497	2.01723e-07	2.56236	yes
glycerophosphorylcholineGPC	2.17553e-07	2.55897	yes
X-11317	2.27411e-07	2.55156	no
phenylalanine	2.59858e-07	-2.53949	yes
X-12244	4.28721e-07	-2.48666	yes
@3methyl2oxovalerate	4.84576e-07	-2.48229	yes
lysine	7.99809e-07	-2.43532	no
X-13215	9.32961e-07	3.30169	no
X-11450	1.1019e-06	-2.40477	no
ADSGEGDFXAEGGGVR	1.18923e-06	-2.39748	yes
myristoleate141n5	1.28575e-06	2.38996	yes
X-11540	1.5609e-06	2.37593	yes
@1palmitoleoylglycerophosphocholine	2.83831e-06	2.31234	no
eicosapentaenoateEPA205n3	2.86453e-06	2.31143	no
Cglycosyltryptophan	2.92799e-06	-2.30924	yes
X-12844	3.19541e-06	-2.31508	no
X-06226	4.09165e-06	2.28205	no
@1docosahexaenoylglycerophosphocholine	5.00966e-06	2.25503	no
X-11787	5.90961e-06	-2.23809	no
@1arachidonoylglycerophosphocholine	6.94265e-06	2.31904	no
X-11537	8.79392e-06	2.20796	no
proline	1.32345e-05	-2.15358	yes
X-06267	1.68356e-05	2.20369	yes
glycine	1.83837e-05	2.11819	yes
glucose	2.10406e-05	-2.10349	yes
erythronate	2.10875e-05	-2.11337	no
laurate120	2.8943e-05	2.06836	yes
@34hydroxyphenyllactate	3.02305e-05	-2.06584	yes
Nacetylthreonine	3.55267e-05	-2.18725	yes
N1methyladenosine	3.66239e-05	-2.04206	yes
X-11820	4.6836e-05	2.02241	no
@1stearoylglycerophosphocholine	5.44014e-05	1.99711	yes
X-12442	6.37411e-05	1.97883	yes
inosine	7.60364e-05	1.98525	no
X-12100	0.000101593	-1.91685	no
@2palmitoylglycerophosphocholine	0.000108956	1.91578	yes
gammaglutamylisoleucine	0.000111919	-2.28794	yes
X-03056	0.000116095	-1.90819	yes
X-12524	0.000136715	1.88849	no
tryptophan	0.000143289	-1.8828	yes
X-11261	0.000152299	-1.89471	no
mannose	0.000154365	-1.87374	yes
X-09026	0.00017109	1.86343	no
X-12095	0.000212847	-1.84413	yes
gammaglutamyltyrosine	0.000215942	-1.85364	no
X-11440	0.000217686	-1.83458	no
histidine	0.000242492	1.81789	yes
isovalerylcarnitine	0.00024671	-1.81573	no
@2stearoylglycerophosphocholine	0.000249793	1.81417	no
betaine	0.00025726	1.81047	no
Nacetylalanine	0.000363244	-1.77359	no
X-12544	0.000381379	1.81596	no
X-11445	0.000390607	-1.81739	no
X-11593	0.000414916	-1.74934	no
threitol	0.000428294	-1.78052	no
tyrosine	0.000452759	-1.73797	yes
caprylate80	0.000659775	1.6881	no
@2methylbutyroylcarnitine	0.000665276	-1.71047	yes
@1linoleoylglycerophosphoethanolamine	0.000697124	1.68069	no
guanosine	0.00082671	1.70862	no
stearidonate184n3	0.000899236	1.65314	yes
deoxycholate	0.000961471	-1.85656	no
hypoxanthine	0.000995093	1.61494	yes
erythritol	0.00112896	-1.61662	no
@1palmitoylglycerophosphocholine	0.001307	1.59397	yes
@3indoxylsulfate	0.00135727	-1.58863	yes
X-11469	0.00139086	1.59979	no
cysteineglutathionedisulfide	0.00140639	1.62353	yes
X-10810	0.00147133	1.72858	yes
glycerol2phosphate	0.00155241	1.98998	no
@3methyl2oxobutyrate	0.00156642	-1.5682	yes
alanine	0.0016795	-1.55817	yes
palmitoleate161n7	0.00210085	1.52559	yes
X-11550	0.00236977	1.5078	no
@1heptadecanoylglycerophosphocholine	0.0026433	1.50341	no
@1eicosatrienoylglycerophosphocholine	0.00271637	1.48742	no
@2linoleoylglycerophosphoethanolamine	0.00284843	2.06877	no
alphatocopherol	0.00306081	1.47118	no
caproate60	0.00307059	1.4689	no
arachidonate204n6	0.00329698	1.45806	no
X-11244	0.00359634	-1.44472	no
X-06350	0.00360621	1.74912	no
@3hydroxybutyrateBHBA	0.00363402	1.44312	yes
X-11552	0.00401921	1.52675	no
isobutyrylcarnitine	0.00435064	-1.41512	no
X-08988	0.00462181	1.40561	no
@4methyl2oxopentanoate	0.00479752	-1.39971	yes
lactate	0.00487717	-1.3971	yes
nonadecanoate190	0.00500555	1.39602	yes
@1stearoylglycerol1monostearin	0.00529917	1.6071	no
gammaglutamylglutamine	0.00541248	1.3805	no
gammaglutamylthreonine	0.00542978	-1.53063	no
heptanoate70	0.00578677	1.36975	no
caffeine	0.00606067	-1.39562	yes
@4ethylphenylsulfate	0.00610527	1.49215	no
theobromine	0.00623017	-1.37268	no
stachydrine	0.0063286	-1.35525	no
X-13429	0.00722175	-1.65756	no
X-12217	0.00767018	-1.35992	no
X-02269	0.00785285	1.35661	no
X-13548	0.00801584	-1.31631	no
butyrylcarnitine	0.00806062	-1.31538	no
@1myristoylglycerophosphocholine	0.00914123	1.29423	yes
X-14086	0.00956907	1.30037	no
X-13183	0.00962891	1.28754	no
X-11521	0.00984491	-1.42543	no
X-11818	0.00988159	-1.3209	no
homocitrulline	0.0103181	-1.34484	no
X-12092	0.0111289	-1.26394	no
pantothenate	0.0114365	-1.27367	no
docosahexaenoateDHA226n3	0.0117201	1.2516	no
X-12441	0.0125976	1.24638	no
X-06351	0.0127794	-1.73294	no
docosapentaenoaten3DPA225n3	0.0133561	1.22869	yes
@7alphahydroxy3oxo4cholestenoate7Hoca	0.0135322	-1.22638	no
pelargonate90	0.0144461	1.21477	no
@1oleoylglycerophosphoethanolamine	0.0150396	1.21347	no
phenylacetylglutamine	0.0151287	-1.20651	no
threonate	0.0151353	1.20644	no
cystine	0.0159074	-1.33873	no
@3dehydrocarnitine	0.0162531	-1.1936	no
serine	0.0175627	1.17952	no
X-11412	0.0176992	1.35808	no
X-12094	0.0190123	-1.17225	yes
X-14189	0.0202082	1.17149	no
carnitine	0.0210655	-1.14592	no
X-12696	0.0226689	-1.17038	no
bradykinindesarg9	0.0227185	-1.24463	no
indolelactate	0.0227696	-1.25676	no
X-11319	0.0229548	1.13228	yes
ornithine	0.0240237	-1.12114	no
HWESASXX	0.024054	-1.1318	yes
DSGEGDFXAEGGGVR	0.0257585	-1.10782	no
threonine	0.0263257	1.1243	no
X-06307	0.0273232	1.11075	no
X-03003	0.0273937	1.10004	no
phenolsulfate	0.0287501	-1.08656	no
X-13549	0.0295182	-1.08277	no
undecanoate110	0.0312561	1.07635	no
urea	0.0326161	-1.06174	no
X-11880	0.0332837	-1.05112	no
X-13069	0.0343606	1.09004	yes
hyodeoxycholate	0.0356221	-1.12618	no
bilirubinZZ	0.0376654	1.05223	no
pyruvate	0.0378829	-1.04206	no
pentadecanoate150	0.0393244	1.04533	no
@2aminobutyrate	0.0435016	1.00332	no
myristate140	0.0441045	1.00047	yes
dehydroisoandrosteronesulfateDHEAS	0.0441594	-1.00021	no
oleamide	0.0452826	0.994977	no
X-14304	0.046487	1.10373	yes
uridine	0.0476431	0.98433	no
@2tetradecenoylcarnitine	0.0514545	1.00486	yes
X-14625	0.0519272	-0.966089	no
X-12510	0.0537832	0.962811	no
X-12206	0.0538934	-0.96272	no
X-11859	0.0547016	0.98396	no
@2hydroxypalmitate	0.0572231	0.945202	no
X-12253	0.0574968	0.97556	no
X-04357	0.0579468	-0.948818	no
eicosenoate201n9or11	0.062481	0.925995	yes
nButylOleate	0.0638314	1.08887	no
glycocholate	0.0649319	-1.14157	no
X-12786	0.0664155	-1.02162	no
erythrose	0.0721693	0.990704	no
myoinositol	0.0735767	-0.88948	no
@2hydroxystearate	0.074445	0.889	no
X-14658	0.0748641	-1.18763	no
X-03088	0.0810357	0.890783	no
X-03090	0.0812686	0.998624	no
linolenatealphaorgamma183n3or6	0.0822218	0.864033	yes
X-11443	0.0838662	-0.868972	no
gammaglutamylmethionine	0.0847339	0.933029	no
X-12216	0.0890818	-1.01493	no
decanoylcarnitine	0.0958982	0.82788	no
X-11529	0.0969759	-0.993456	no
@1methylxanthine	0.0972625	1.02036	no
citrulline	0.098659	0.822229	no
xanthine	0.101761	-0.81364	no
glutaroylcarnitine	0.102875	-0.816184	no
X-14057	0.104562	-0.861568	no
X-11538	0.110912	0.793402	yes
piperine	0.111519	-0.7978	yes
X-13859	0.111956	0.80913	no
dimethylarginineSDMAADMA	0.114222	-0.785407	no
X-11441	0.116819	0.82803	no
alphaketoglutarate	0.117215	-1.00184	no
X-12830	0.117355	-0.940607	no
catecholsulfate	0.120843	-0.771385	no
X-11334	0.121904	-0.804682	no
@10undecenoate111n1	0.123713	0.765492	yes
indoleacetate	0.124982	-0.768608	no
X-13372	0.125045	0.81073	no
X-10506	0.127729	-0.759282	no
arginine	0.12826	0.762096	no
@3methylxanthine	0.128279	-0.928003	no
@1stearoylglycerophosphoinositol	0.136535	0.746679	no
N2N2dimethylguanosine	0.137075	-1.02699	no
@7methylguanine	0.138353	-0.751674	no
X-12990	0.13961	-0.805739	no
hippurate	0.140128	-0.733686	yes
X-12556	0.141917	-0.764558	no
X-12734	0.148314	0.977824	no
X-12093	0.155691	-0.913727	no
X-14450	0.162917	-0.763151	no
X-14662	0.165063	-0.9198	no
X-12405	0.167042	-0.700315	no
quinate	0.168581	0.743807	no
@1methylurate	0.174207	0.823994	no
taurolithocholate3sulfate	0.174497	-0.720002	no
X-12749	0.174785	-0.698041	no
X-11299	0.176769	0.719577	no
dodecanedioate	0.176824	0.926824	no
X-12644	0.178286	0.669489	no
thromboxaneB2	0.188332	-0.664153	no
@7methylxanthine	0.190651	-0.722903	no
X-14541	0.190704	-0.955693	no
X-12798	0.19585	-0.653629	yes
mannitol	0.196324	-0.682317	no
X-12627	0.199486	0.687849	no
leucylleucine	0.200185	-0.832789	no
X-14626	0.20221	-0.767469	no
X-11845	0.203329	-0.801669	no
@2hydroxybutyrateAHB	0.215455	-0.616157	yes
octadecanedioate	0.215569	0.658172	no
X-13671	0.21862	0.616976	no
bilirubinEE	0.220128	0.609938	yes
X-04498	0.229253	-0.625675	no
@17dimethylurate	0.231729	-0.790897	no
X-13619	0.23196	0.594601	no
X-02973	0.238518	0.588793	no
X-13477	0.241144	-0.597323	no
bilirubinEZorZE	0.243858	0.641149	no
dihomolinoleate202n6	0.245644	0.577541	yes
linoleate182n6	0.250566	0.571567	yes
X-11530	0.251979	0.580698	no
X-06246	0.253179	-0.588667	no
acetylcarnitine	0.254031	-0.567411	yes
X-12816	0.256134	0.676818	no
X-05491	0.264018	0.624624	no
glycerol	0.266664	0.552583	yes
X-11315	0.272222	0.546211	no
hexanoylcarnitine	0.273949	-0.54425	yes
trans4hydroxyproline	0.275308	0.542712	no
X-04499	0.276328	-0.576797	no
X-13741	0.281546	-0.611565	no
X-11470	0.283431	-0.547074	yes
tiglylcarnitine	0.285392	-0.598576	no
@10heptadecenoate171n7	0.287795	0.528819	yes
@1arachidonoylglycerophosphoethanolamine	0.289859	0.526563	no
glutamine	0.297266	0.518551	no
@1palmitoylglycerophosphoethanolamine	0.302715	0.516906	no
@2hydroxyisobutyrate	0.305243	0.526728	no
X-11852	0.307875	0.685286	no
adrenate224n6	0.312683	-0.502291	yes
@4acetamidobutanoate	0.323772	-0.499089	yes
X-09706	0.327149	-0.488501	no
X-12443	0.329148	-0.596976	no
methionine	0.331839	-0.482807	yes
@10nonadecenoate191n9	0.332095	0.48255	yes
@1palmitoylglycerophosphoinositol	0.337731	0.527907	no
@3methoxytyrosine	0.338697	-0.490658	no
X-09108	0.343936	0.505603	no
X-11381	0.346824	-0.46886	no
X-12056	0.349752	-0.555196	no
@5oxoproline	0.35116	0.463875	no
creatinine	0.352896	-0.462207	no
X-14208	0.353789	-0.492365	no
thymolsulfate	0.354475	-0.623998	no
X-11876	0.355416	0.554416	no
@1stearoylglycerophosphoethanolamine	0.364862	0.482184	no
X-13553	0.368531	-0.47492	no
X-11247	0.371753	0.451569	no
X-06126	0.372996	-0.444015	no
asparagine	0.38612	0.432222	no
palmitoylcarnitine	0.386868	0.431683	yes
androsteronesulfate	0.388911	-0.429819	yes
X-14374	0.392495	-0.433346	no
aspartate	0.403055	-0.423542	no
octanoylcarnitine	0.421969	0.39956	no
@3carboxy4methyl5propyl2furanpropanoateCMPF	0.425538	0.399005	no
X-14473	0.427521	-0.41354	no
margarate170	0.443321	-0.381449	yes
@1arachidonoylglycerophosphoinositol	0.443499	0.381771	no
@4vinylphenolsulfate	0.44549	0.38413	no
X-12704	0.450284	-0.462792	no
X-14977	0.452389	0.411966	no
X-11255	0.455431	-0.389916	no
creatine	0.463193	-0.365036	no
X-12771	0.46452	-0.473359	no
homostachydrine	0.468246	0.383881	no
cortisol	0.473085	0.357359	yes
X-12428	0.478219	0.404473	yes
@3hydroxy2ethylpropionate	0.48632	0.488329	no
X-12776	0.490948	0.342753	no
X-11421	0.491143	0.342598	no
laurylcarnitine	0.508348	0.345007	yes
betahydroxyisovalerate	0.509565	-0.339246	no
X-11491	0.509628	-0.369769	no
X-12850	0.509701	-0.367998	no
heme	0.510291	0.332753	no
X-11795	0.516151	0.323097	no
X-11327	0.516303	0.322981	no
X-01911	0.524202	-0.322002	no
X-11485	0.533301	-0.330999	no
oleoylcarnitine	0.533781	0.310055	yes
X-12212	0.537473	-0.343038	no
arabitol	0.539322	0.305461	no
biliverdin	0.539767	0.366158	no
serotonin5HT	0.545689	0.302297	yes
X-11799	0.546363	0.315325	no
X-11423	0.558777	-0.291233	no
cholate	0.569223	-0.335419	no
cysteine	0.576335	0.278617	no
alphahydroxyisovalerate	0.59204	-0.266676	yes
X-12717	0.594564	0.336716	no
indolepropionate	0.596906	0.26318	no
X-14205	0.601846	-0.290665	no
oleate181n9	0.613585	0.251293	yes
stearoylcarnitine	0.617189	0.257564	no
X-12465	0.6258	0.274737	yes
valerate	0.626474	-0.26834	no
cortisone	0.637813	-0.237512	yes
phenyllactatePLA	0.63869	0.288379	no
hydroxyisovaleroylcarnitine	0.647356	-0.241629	no
X-02249	0.649076	-0.226455	no
paraxanthine	0.653853	-0.23521	no
X-04494	0.654417	-0.264019	no
benzoate	0.660744	0.219482	no
X-11452	0.667362	-0.21857	no
X-11422	0.668441	-0.213142	no
X-11792	0.669431	0.317498	no
@1palmitoylglycerol1monopalmitin	0.671353	0.223336	yes
X-04495	0.676061	0.215887	no
X-11204	0.677259	0.207129	yes
X-12855	0.677558	0.298837	no
X-12231	0.684412	-0.211908	no
X-11437	0.684703	0.232092	no
glycylvaline	0.687055	0.244295	no
fructose	0.688222	0.199697	no
aspartylphenylalanine	0.689629	0.200191	no
taurochenodeoxycholate	0.692189	-0.253789	no
pyroglutamine	0.700585	-0.191367	no
ADpSGEGDFXAEGGGVR	0.701912	-0.190476	yes
@3phenylpropionatehydrocinnamate	0.70462	0.218022	no
hexadecanedioate	0.705268	0.246224	no
X-09789	0.707965	0.186589	no
X-11374	0.740357	0.168015	no
X-11805	0.744425	0.162241	no
gammatocopherol	0.749484	0.218339	no
X-14745	0.754015	0.177979	yes
levulinate4oxovalerate	0.770767	-0.19418	no
epiandrosteronesulfate	0.771432	-0.144795	no
X-05426	0.783366	0.152592	no
isovalerate	0.785539	-0.135885	no
X-12230	0.786174	0.167416	no
ursodeoxycholate	0.786569	-0.182826	no
dihomolinolenate203n3orn6	0.786905	0.134538	no
X-12680	0.791156	-0.147391	no
X-10675	0.799714	0.155241	no
arabinose	0.800371	-0.167359	no
stearate180	0.801307	0.125244	yes
pyridoxate	0.801685	-0.125471	no
X-14588	0.803943	0.123548	no
X-14478	0.811338	-0.118796	no
X-11442	0.82122	0.120481	no
X-11438	0.823185	0.117923	no
X-12719	0.828897	-0.142305	no
X-13435	0.855866	0.0944755	no
theophylline	0.858802	0.0946837	no
citrate	0.86356	0.0856366	yes
X-13431	0.863581	0.0917486	no
X-11786	0.890446	-0.0685511	no
X-03094	0.897277	-0.0642522	yes
X-11809	0.897372	-0.0641928	no
palmitate160	0.898646	0.0633914	yes
Nacetylornithine	0.904164	-0.0599356	no
choline	0.910955	-0.0556586	no
glycochenodeoxycholate	0.913499	-0.0564071	no
X-11568	0.920995	0.0590961	no
inositol1phosphateI1P	0.926923	0.052605	yes
pcresolsulfate	0.931602	0.0427163	no
X-12029	0.93644	-0.0420693	no
X-08766	0.943732	0.0476888	yes
X-11546	0.945949	-0.0407177	no
X-11793	0.94966	0.0323737	yes
X-11849	0.951165	0.0325291	no
glycerate	0.952866	0.0293605	no
scylloinositol	0.960819	0.027238	no
X-11847	0.961444	0.0261998	no
linoleamide182n6	0.969587	0.0189753	no
X-11850	0.970564	-0.021142	no
prohydroxypro	0.973208	-0.0167355	no
X-12236	0.975601	0.0200944	no
X-12039	0.986271	0.00925389	no
@15anhydroglucitol15AG	0.98714	-0.00804366	no
malate	0.989765	-0.00677898	no
X-11843	0.995739	0.00359845	no
pipecolate	0.996504	-0.00218063	no
ascorbateVitaminC	0.999896	-6.78088e-05	no

## Sheet: HDL-C mRNAs
mRNA	p-value	beta	mRNA in BMTI?
HDC	7.58001e-22	4.62884	yes
GATA2	7.74996e-22	4.62781	yes
SLC45A3	5.13833e-21	4.5388	yes
C1ORF186	3.02329e-17	4.09956	yes
ATP5EP2	8.03239e-17	-4.0465	yes
CPA3	5.91643e-16	3.93544	yes
FCER1A	3.72624e-15	3.82975	yes
MS4A2	1.3021e-14	3.75593	yes
TCEB2	1.38561e-14	-3.75222	yes
ENPP3	1.29581e-13	3.61587	yes
AHSP	1.39085e-13	-3.61146	yes
HMGXB4	2.21153e-13	-3.5824	yes
PNP	3.97089e-12	-3.39516	yes
ABCG1	4.37839e-12	3.38863	yes
GYPB	5.8932e-12	-3.36867	yes
ATP5J2	7.45498e-12	-3.35278	yes
CA1	1.5503e-11	-3.30277	yes
MS4A3	2.27027e-11	3.27638	yes
GYPE	4.08853e-11	-3.23523	yes
C14ORF2	5.31987e-11	-3.21663	yes
COX7C	6.6667e-11	-3.20059	yes
ATP5L	9.75273e-11	-3.17335	yes
RAI1	1.15837e-10	3.16095	no
POLR1D	1.22916e-10	-3.15666	yes
RPS15A	2.93379e-10	-3.09305	yes
IFIT1B	3.30749e-10	-3.08417	yes
FOS	3.4746e-10	3.08051	yes
TNFRSF21	3.55185e-10	3.07888	yes
AVPI1	3.72167e-10	3.07541	yes
SNORD56	6.6938e-10	-3.03141	yes
BPGM	6.9632e-10	-3.02843	yes
COX7A2	7.41213e-10	-3.0237	yes
PFDN5	8.32847e-10	-3.01486	yes
SELK	8.33249e-10	-3.01482	yes
NDUFB3	1.08893e-09	-2.99441	yes
CD52	1.26428e-09	-2.98296	no
S100A8	2.11608e-09	-2.94311	yes
UBE2F	2.99263e-09	-2.91596	yes
NDUFB2	3.0433e-09	-2.91464	yes
RPS21	3.56795e-09	-2.90209	yes
UQCRQ	4.34318e-09	-2.8865	yes
RAB2B	5.03527e-09	-2.87471	yes
CPT2	5.56718e-09	2.86668	no
RPS24	6.41696e-09	-2.85527	yes
GLRX5	7.66391e-09	-2.84095	yes
RPL21	8.01307e-09	-2.83734	yes
RPL41	8.09409e-09	-2.83653	yes
MYLIP	8.43165e-09	2.83322	no
TCTEX1D2	8.84328e-09	-2.82935	no
MYL4	1.07131e-08	-2.81372	yes
EPAS1	1.26927e-08	2.79984	yes
RPIA	1.35082e-08	-2.79472	yes
RPL12	1.52435e-08	-2.78476	yes
DUSP1	1.61201e-08	2.78014	yes
ATP5H	2.01997e-08	-2.76141	yes
JARID2	2.1934e-08	2.75454	no
ABCA1	2.92815e-08	2.7303	yes
ARL4A	3.14666e-08	-2.72423	yes
MMP25	3.41399e-08	2.71734	yes
DPH3	3.48415e-08	-2.71561	yes
WDR1	3.90624e-08	2.7059	no
REXO2	4.43872e-08	-2.69501	yes
TCF20	4.51185e-08	2.69361	no
TXN	4.54792e-08	-2.69293	yes
CBX4	4.65735e-08	2.6909	no
GTF2H5	4.69711e-08	-2.69017	yes
RHAG	4.95533e-08	-2.68559	no
MRPL21	5.10432e-08	-2.68305	yes
CALML4	5.59803e-08	-2.67512	no
TOMM7	5.89512e-08	-2.67066	yes
RBX1	6.01504e-08	-2.66892	yes
ITLN1	6.33347e-08	-2.66447	yes
HBG2	6.60201e-08	-2.66088	no
PPP1R15A	6.66526e-08	2.66005	no
LRRC26	7.06989e-08	2.65495	yes
RPS27	7.28558e-08	-2.65234	yes
CTDSP2	8.12712e-08	2.64283	yes
CMTM3	8.37812e-08	2.64018	yes
CACNG6	8.50826e-08	2.63884	yes
SESN3	8.9996e-08	-2.63393	yes
MRPS18C	9.56899e-08	-2.62856	yes
FECH	9.94199e-08	-2.62521	yes
LSM1	1.1366e-07	-2.61344	no
NDUFA4	1.19685e-07	-2.60888	yes
RPL11	1.24991e-07	-2.60505	yes
CMIP	1.26093e-07	2.60427	no
KLF6	1.28397e-07	2.60267	no
RPL26	1.31291e-07	-2.60069	yes
PITHD1	1.33462e-07	-2.59924	yes
SELENBP1	1.50611e-07	-2.58851	yes
DAZAP2	1.61435e-07	2.58232	no
SLC6A9	1.74079e-07	-2.57558	yes
FAM46C	1.87046e-07	-2.56915	yes
C11ORF1	1.87278e-07	-2.56904	yes
GPR18	1.8877e-07	-2.56833	no
MRPL30	1.89065e-07	-2.56819	no
RPL31	2.01054e-07	-2.56266	yes
C12ORF10	2.02994e-07	-2.5618	no
POLR2A	2.09492e-07	2.55896	no
HMBS	2.1154e-07	-2.55809	yes
ZMAT2	2.12739e-07	-2.55758	yes
IAH1	2.16879e-07	-2.55584	yes
MRPL42	2.18841e-07	-2.55503	no
IGFBP1	2.2124e-07	-2.55405	yes
RPS27L	2.30088e-07	-2.55051	yes
STK40	2.33018e-07	2.54936	no
RAB11FIP1	2.43256e-07	2.54547	yes
LOC285593	2.56864e-07	-2.54054	no
HDDC3	2.64164e-07	-2.538	no
ATP5J	2.66361e-07	-2.53724	yes
CAV2	2.74719e-07	2.53444	yes
DBI	2.88677e-07	-2.52993	yes
BANP	2.97852e-07	2.52707	no
SF3B14	3.08368e-07	-2.52391	yes
C17ORF61	3.51219e-07	-2.512	yes
RPL30	3.67978e-07	-2.50772	yes
UQCRH	3.84841e-07	-2.5036	yes
COX6C	3.86967e-07	-2.50309	yes
CDKL1	3.93294e-07	-2.5016	yes
CISD2	4.03197e-07	-2.4993	yes
HIST3H2A	4.11249e-07	-2.49748	no
TEX101	4.4701e-07	2.48977	yes
PFN1	4.61597e-07	2.4868	no
FNBP1	4.62776e-07	2.48656	no
COX6A1	4.74423e-07	-2.48426	no
RARA	4.8324e-07	2.48255	no
DCAF12	4.91942e-07	-2.48089	yes
POLE4	5.34287e-07	-2.47321	no
SEMA4D	5.35953e-07	2.47292	yes
SLIRP	6.00991e-07	-2.46222	yes
PPM1F	6.12711e-07	2.46041	yes
TXNDC17	7.04449e-07	-2.4473	yes
CD97	7.20535e-07	2.44517	no
ZFP36L2	7.23397e-07	2.4448	no
HINT1	7.48105e-07	-2.44163	yes
PLAC8	8.22029e-07	-2.43272	no
ERH	8.6219e-07	-2.4282	yes
C14ORF45	8.95254e-07	-2.42462	yes
NTAN1	9.05762e-07	-2.42351	no
TBCEL	9.2573e-07	-2.42144	no
ITGB2	9.81514e-07	2.41586	no
RPL39L	1.03878e-06	-2.41044	yes
CKS1B	1.07109e-06	-2.40751	no
RNF24	1.12574e-06	2.40274	yes
CEBPD	1.14775e-06	2.40089	yes
DARC	1.15436e-06	-2.40033	yes
ZMIZ1	1.18167e-06	2.39809	no
TAP1	1.18771e-06	2.3976	yes
TTC25	1.21442e-06	-2.39546	no
MYO9B	1.30583e-06	2.38847	no
HNRNPR	1.39333e-06	2.3822	no
MYL6	1.40064e-06	-2.38169	yes
RWDD1	1.41036e-06	-2.38102	yes
DPM2	1.42501e-06	-2.38002	no
AKAP13	1.43883e-06	2.37909	no
KRT86	1.46058e-06	2.37763	yes
ACTN4	1.59159e-06	2.36929	no
BTF3	1.61634e-06	-2.36779	yes
TMEM183A	1.66815e-06	-2.36472	no
NDEL1	1.756e-06	2.35971	no
C11ORF10	1.85177e-06	-2.35452	yes
PRDX2	1.93831e-06	-2.35004	no
ATP5I	2.02418e-06	-2.34579	yes
COMMD6	2.07006e-06	-2.34359	yes
EIF3H	2.08083e-06	-2.34307	no
TMBIM6	2.08648e-06	2.34281	no
CTNNAL1	2.10806e-06	-2.3418	yes
MARCH8	2.12618e-06	-2.34095	yes
NDUFS4	2.15881e-06	-2.33945	yes
TRIM10	2.21441e-06	-2.33695	yes
HSPE1	2.26258e-06	-2.33482	yes
CD3D	2.27666e-06	-2.33421	no
CCDC56	2.3442e-06	-2.33132	no
CD200R1L	2.34881e-06	2.33113	no
FAM129A	2.38669e-06	2.32955	no
CSF3R	2.47521e-06	2.32594	no
PTPLA	2.62642e-06	-2.32006	no
BTLA	2.68239e-06	-2.31797	yes
PRKCB	2.72552e-06	2.31638	no
PSD4	3.00651e-06	2.3066	no
MXD1	3.05081e-06	2.30514	yes
SYTL3	3.16325e-06	2.30152	yes
SNRPD2	3.26795e-06	-2.29825	yes
TRIAP1	3.28109e-06	-2.29785	no
RNF11	3.28882e-06	-2.29762	yes
DPCD	3.35875e-06	-2.2955	yes
RPL34	3.42682e-06	-2.29349	yes
SRSF4	3.47099e-06	2.2922	no
DCAF6	3.53042e-06	-2.2905	no
SLC35E1	3.60918e-06	2.28828	no
SLC35E3	3.70752e-06	2.28557	no
RFESD	3.86091e-06	-2.28148	no
MBD6	3.91609e-06	2.28004	no
BABAM1	3.92369e-06	-2.27985	no
RPL35A	3.95023e-06	-2.27917	yes
MIDN	4.13037e-06	2.27466	no
UROD	4.1781e-06	-2.27349	no
PTPN1	4.18586e-06	2.2733	no
LOC401397	4.23946e-06	-2.27201	yes
MYO1F	4.32128e-06	2.27008	yes
PUM1	4.35031e-06	2.2694	no
CHPF2	4.38185e-06	2.26866	no
GRAMD4	4.43738e-06	2.26738	yes
VPS37C	4.43874e-06	2.26735	no
MLL5	4.50893e-06	2.26576	yes
BNIP3L	4.52279e-06	-2.26545	yes
CKS2	4.52568e-06	-2.26538	no
GNB1	4.68304e-06	2.2619	no
DNAJA4	4.7796e-06	-2.25982	yes
XPC	4.84251e-06	2.25849	no
DPH5	5.04427e-06	-2.25432	no
TACC1	5.35067e-06	2.24829	yes
PPP1R11	5.38969e-06	2.24755	no
CCDC167	5.53179e-06	-2.24488	no
ABCC13	5.69032e-06	-2.24198	yes
C10ORF47	5.78334e-06	2.24031	no
ATPIF1	5.88496e-06	-2.23852	no
LASP1	6.04059e-06	2.23583	no
METRNL	6.37494e-06	2.23028	yes
RBM38	6.4675e-06	-2.22879	yes
SELPLG	6.50429e-06	2.2282	no
EEF2K	6.60849e-06	2.22656	no
EPB42	6.69036e-06	-2.22529	no
PRDX5	6.79184e-06	-2.22373	no
MRPS33	6.82014e-06	-2.2233	no
BCL2L1	6.93182e-06	-2.22162	no
DPEP2	7.00098e-06	2.22059	yes
BOLA3	7.16478e-06	-2.21819	yes
SMARCC2	7.23971e-06	2.21711	no
HAGH	7.39553e-06	-2.21489	yes
STRADB	7.46964e-06	-2.21386	yes
PTRH2	7.47607e-06	-2.21377	yes
STK24	7.52441e-06	2.2131	no
TMEM126A	8.03524e-06	-2.20625	no
TBCA	8.05587e-06	-2.20599	no
SLC15A4	8.43619e-06	2.20117	yes
BRP44	8.5229e-06	-2.2001	no
TMEM14C	8.65904e-06	-2.19844	no
TMEM43	8.66215e-06	2.1984	no
NDUFAF2	8.72885e-06	-2.1976	no
ZNHIT3	8.77861e-06	-2.197	no
PAX7	8.98308e-06	-2.19459	yes
TMOD1	9.01775e-06	-2.19419	yes
ZSWIM4	9.38715e-06	2.18997	no
CKLF	9.51825e-06	-2.18851	no
BCL3	9.52382e-06	2.18845	no
BLOC1S1	9.63242e-06	-2.18726	no
METTL22	9.87339e-06	-2.18466	no
TRIM8	1.00036e-05	2.18328	no
PRPF4	1.00059e-05	2.18325	yes
ATG2A	1.00218e-05	2.18308	no
RGS10	1.03021e-05	-2.18017	yes
SPEN	1.03092e-05	2.1801	no
RPL26L1	1.0658e-05	-2.17659	yes
IFI27	1.08387e-05	-2.17481	no
LSM7	1.1664e-05	-2.16703	no
KRT1	1.17747e-05	-2.16603	yes
MAST3	1.23704e-05	2.16078	no
DYNLL1	1.24103e-05	-2.16043	no
ZNF585A	1.2538e-05	-2.15934	yes
VN1R4	1.26275e-05	-2.15859	no
CCDC53	1.27952e-05	-2.15718	no
ACTN1	1.29008e-05	2.1563	no
RPL24	1.36865e-05	-2.14999	no
MRPS23	1.39278e-05	-2.14812	no
GMPR	1.40042e-05	-2.14753	yes
HSPB11	1.42162e-05	-2.14592	no
C17ORF76-AS1	1.4264e-05	-2.14556	no
UBL5	1.44519e-05	-2.14416	yes
CLEC4A	1.47802e-05	-2.14175	no
RPL27	1.48871e-05	-2.14097	no
ELL	1.52266e-05	2.13855	no
CCNA1	1.54741e-05	2.13681	yes
TMPRSS9	1.55059e-05	-2.13659	no
HEMGN	1.57553e-05	-2.13487	yes
RAB7A	1.58046e-05	2.13454	no
SLC14A1	1.64023e-05	-2.13053	yes
ACSL6	1.65864e-05	-2.12933	no
C17ORF109	1.72543e-05	-2.12506	no
TRAK2	1.77567e-05	-2.12195	yes
SRRD	1.79221e-05	-2.12095	yes
SNCA	1.80953e-05	-2.11991	yes
GYPC	1.86259e-05	-2.11677	no
OPTN	1.86635e-05	-2.11655	yes
NSUN3	1.87136e-05	-2.11626	no
LSM10	1.94229e-05	-2.11221	no
LITAF	1.99902e-05	2.10908	no
IGF2R	2.12458e-05	2.10243	no
TPGS2	2.1542e-05	-2.10091	yes
CASP9	2.20642e-05	2.09829	yes
RPS13	2.21593e-05	-2.09782	no
KIAA0247	2.23168e-05	2.09704	yes
RPL7	2.2366e-05	-2.0968	yes
ALDH9A1	2.24485e-05	2.0964	no
MNT	2.28105e-05	2.09464	no
AKNA	2.30574e-05	2.09346	no
MDH1	2.32111e-05	-2.09273	no
GUK1	2.33065e-05	-2.09228	yes
SCAMP5	2.3857e-05	2.08972	yes
MAP7D1	2.53377e-05	2.08309	no
PHF5A	2.55487e-05	-2.08217	no
SNX3	2.56437e-05	-2.08176	no
ZRANB2	2.58979e-05	2.08067	no
GSTO1	2.6005e-05	-2.08022	yes
CECR1	2.62299e-05	2.07927	yes
RPS3A	2.62969e-05	-2.07898	no
ENY2	2.71547e-05	-2.07543	no
KLRB1	2.73439e-05	-2.07466	no
CYP2S1	2.80616e-05	2.07179	no
CLECL1	2.83101e-05	-2.07082	no
RPS7	2.86478e-05	-2.0695	no
RPS29	2.967e-05	-2.0656	no
GGTLC1	2.97624e-05	-2.06526	no
PLEKHG3	2.97967e-05	2.06513	yes
PDE4D	2.99031e-05	2.06473	yes
FPR1	3.02362e-05	2.0635	yes
LGALS3	3.09085e-05	-2.06105	no
OCIAD2	3.09519e-05	-2.0609	no
PDZK1IP1	3.14245e-05	-2.05921	no
C1ORF150	3.20221e-05	2.0571	no
SETD2	3.28204e-05	2.05435	no
GEMIN6	3.29135e-05	-2.05404	no
PDRG1	3.30595e-05	-2.05354	no
CDC34	3.41116e-05	-2.05004	no
KIF16B	3.42194e-05	2.04968	no
YOD1	3.46522e-05	-2.04827	no
PLEK2	3.49618e-05	-2.04728	yes
HEPACAM2	3.53127e-05	-2.04616	no
EP300	3.53846e-05	2.04593	no
GLRX	3.54888e-05	-2.0456	no
RPL23	3.64767e-05	-2.04251	no
ASIP	3.66687e-05	2.04192	no
EEPD1	3.72778e-05	2.04007	no
C12ORF57	3.7661e-05	-2.03892	no
SULF2	3.7811e-05	2.03847	no
RPL35	3.87259e-05	-2.03578	no
RIOK3	3.89125e-05	-2.03524	yes
PRKCD	3.91693e-05	2.03449	no
KEL	4.02608e-05	-2.03139	yes
SIAH2	4.10227e-05	-2.02927	yes
CISD1	4.16221e-05	-2.02763	no
H2AFY	4.23717e-05	2.02561	no
MYL6B	4.38267e-05	-2.02178	no
APOBR	4.38508e-05	2.02172	no
TIMM23	4.48981e-05	-2.01904	yes
NFIX	4.62101e-05	-2.01576	no
FAM18B2	4.62305e-05	-2.01571	no
SHARPIN	4.73527e-05	-2.01298	no
SRRM2	4.80202e-05	2.01138	no
PPA1	4.83143e-05	-2.01069	no
ACOT13	5.08812e-05	-2.00477	no
OSBP2	5.12623e-05	-2.00392	no
MAF	5.24265e-05	2.00135	no
EXOC3L1	5.26091e-05	2.00095	no
PSMC2	5.33269e-05	-1.99939	no
PTAFR	5.36096e-05	1.99879	no
STAT3	5.37643e-05	1.99846	no
PTRHD1	5.41816e-05	-1.99757	no
SLC6A10P	5.64761e-05	-1.9928	no
YWHAH	5.66088e-05	1.99253	no
GMEB2	5.72313e-05	1.99127	no
C19ORF53	5.76295e-05	-1.99048	no
CHPT1	5.76715e-05	-1.99039	yes
SHFM1	5.7929e-05	-1.98988	yes
JUN	5.8692e-05	1.98837	no
EFHD2	5.94406e-05	1.98691	no
HOXA5	6.08596e-05	1.98418	no
ARHGEF12	6.0928e-05	-1.98405	yes
MPPE1	6.09464e-05	1.98402	no
ANKHD1	6.23619e-05	1.98136	no
FCRL2	6.38e-05	-1.97872	no
DICER1	6.41513e-05	1.97809	no
EMG1	6.5205e-05	-1.9762	no
TMEM126B	6.73495e-05	-1.97244	yes
NUP153	6.88774e-05	1.96984	no
IL2RB	6.93137e-05	1.9691	yes
ICAM3	6.99342e-05	1.96806	no
RBM23	7.10702e-05	1.96619	no
RAMP1	7.18293e-05	1.96495	no
LAPTM5	7.18828e-05	1.96486	yes
EEF1B2	7.34336e-05	-1.96237	no
BBS4	7.37717e-05	1.96183	yes
DYRK4	7.44178e-05	-1.96081	no
ELMO1	7.62167e-05	1.95802	no
ALDOB	7.6278e-05	-1.95793	no
TIMP2	7.80869e-05	1.95518	no
FLJ37453	7.82478e-05	1.95494	no
PTPRE	7.88371e-05	1.95406	yes
UFC1	8.25643e-05	-1.94864	yes
TATDN1	8.27383e-05	-1.94839	no
ISCU	8.366e-05	-1.94709	no
SNRNP25	8.36735e-05	-1.94707	no
COMMD3	8.39224e-05	-1.94672	no
FES	8.47754e-05	1.94553	no
FAM210B	8.5601e-05	-1.94439	no
MBOAT7	8.5659e-05	1.94431	yes
EIF4A3	8.59815e-05	1.94387	no
FOXK1	8.8582e-05	1.94036	no
BLVRB	8.94907e-05	-1.93915	no
HEATR3	9.21043e-05	1.93575	no
FOSB	9.21431e-05	1.9357	no
UBE2O	9.22454e-05	-1.93557	no
ATXN1L	9.31827e-05	1.93437	no
IL18BP	9.39229e-05	1.93344	no
NUDT1	9.59e-05	-1.93097	no
SLC23A2	9.60307e-05	1.93081	no
FAM170B	9.70001e-05	1.92961	no
RBM22	9.71718e-05	1.92941	no
ARFGAP3	9.76802e-05	1.92879	no
ZMAT3	0.00010025	1.9257	no
PLD3	0.000100406	1.92552	no
MXI1	0.000100871	-1.92497	no
NCSTN	0.000103062	1.92241	yes
DAPP1	0.000107611	1.91726	no
TNFRSF1A	0.000108915	1.91582	no
RNF187	0.000109722	-1.91494	no
KIAA0196	0.000111323	1.91321	no
MRPS21	0.000111699	-1.91281	no
STARD5	0.000112287	1.91218	no
MEPCE	0.000113187	1.91122	no
PRKAR1A	0.00011366	1.91073	no
TNF	0.000113724	-1.91066	no
FGD3	0.000116074	1.90821	no
IRS2	0.00011617	1.90811	yes
TKT	0.000116483	1.90779	no
TAS2R20	0.000117564	1.90668	no
ST6GALNAC4	0.000118895	-1.90533	no
RRM2	0.000119656	1.90456	no
COMMD8	0.000120337	-1.90388	yes
RAD23A	0.000122558	-1.90168	no
C1ORF54	0.000123017	-1.90123	no
DPAGT1	0.000124693	1.8996	no
KIT	0.000125364	1.89896	no
IFNAR2	0.000126221	1.89814	yes
CXCR4	0.00013298	1.89184	yes
RPL17	0.000134275	-1.89067	no
C1RL	0.000136379	1.88879	yes
SLC43A2	0.000137114	1.88814	no
CREG1	0.000140542	-1.88515	no
TCEB1	0.000141018	-1.88474	no
HDGF	0.000142919	-1.88311	yes
C2ORF88	0.000144994	-1.88136	yes
MRPL14	0.000145628	-1.88083	yes
P4HB	0.000146411	1.88018	no
IL16	0.000148331	1.8786	no
GPR152	0.00015042	-1.8769	no
DHX38	0.000153964	1.87406	no
RPS14	0.000154004	-1.87403	no
RPS25	0.000157369	-1.87139	no
ARAP1	0.000158552	1.87048	no
SS18L2	0.000159259	-1.86993	no
CBX6	0.000162547	1.86743	no
VPS29	0.000165174	-1.86547	no
AQP2	0.000166024	-1.86484	no
FBXO9	0.000170163	-1.86183	no
PDCD10	0.000172592	-1.86009	yes
MSI2	0.000172829	-1.85992	yes
PLRG1	0.000175045	-1.85835	no
ALOX5AP	0.000179418	1.85532	no
GRINA	0.000180156	-1.85481	no
KLF1	0.000180169	-1.8548	no
TMEM86B	0.000181811	-1.85369	yes
HEBP1	0.000182093	-1.8535	no
GAB2	0.000182855	1.85298	yes
ATP6V1A	0.000183015	1.85287	no
ZNF335	0.000183179	1.85276	no
BHLHE40	0.000183202	1.85275	no
BEST1	0.000185048	1.85151	yes
TMCC2	0.000186233	-1.85073	yes
RAB22A	0.000186723	1.8504	no
CREBBP	0.000187001	1.85022	no
LYN	0.000188436	1.84927	no
RPS10	0.000192064	-1.84692	no
SNUPN	0.000192964	-1.84634	no
EXOSC1	0.000196555	-1.84406	no
CCDC23	0.000196718	-1.84396	no
RANBP10	0.00019761	-1.8434	no
ETS2	0.000197687	1.84335	no
TECPR2	0.000197789	1.84329	no
ADIPOR1	0.000198837	-1.84263	yes
EPHB1	0.000200064	1.84187	no
SLC4A1	0.000200263	-1.84175	yes
TFCP2	0.000200508	1.84159	no
TCN1	0.000203269	1.8399	yes
TYW1	0.000204887	-1.83892	no
CA8	0.000205406	1.8386	no
CTSE	0.0002076	-1.83728	no
CYBRD1	0.000207783	1.83717	no
ZNF574	0.000210523	1.83555	no
TESC	0.00021136	-1.83505	no
MON1B	0.000212989	1.8341	no
SNX27	0.000214243	1.83337	no
ZYG11B	0.000218267	1.83105	no
XPO6	0.000219282	1.83047	yes
BCAR3	0.000221343	1.82931	no
PRSS3	0.000222647	1.82857	yes
CEACAM3	0.000224363	1.82762	no
INCENP	0.000224596	1.82749	no
GYPA	0.000225471	-1.827	no
FBXO7	0.000227746	-1.82575	yes
ITM2B	0.000229426	1.82483	no
ATG16L2	0.000231249	1.82384	yes
VHL	0.000231746	1.82357	no
POMP	0.000232084	-1.82339	no
SLC27A1	0.000232328	1.82326	no
C6ORF48	0.000236297	-1.82114	no
GMEB1	0.000236725	1.82091	no
GIT2	0.000238497	1.81998	no
PSMF1	0.000239335	-1.81954	no
EPB49	0.000242273	-1.81801	no
MRPL34	0.000243331	-1.81746	no
RAB3IL1	0.000247657	-1.81525	no
CMTM7	0.000252215	1.81296	no
KIR3DL1	0.000252384	1.81287	yes
DLEU1	0.000253311	-1.81241	no
SLC8A3	0.00025732	1.81044	no
CABIN1	0.000262752	1.80781	yes
SKA2	0.000264801	-1.80683	no
PFKFB4	0.000265783	1.80636	yes
QPRT	0.000266264	1.80613	no
RAF1	0.000266277	1.80612	no
ITGA7	0.000266429	-1.80605	no
NUP37	0.000266489	-1.80602	no
FLJ13224	0.00026652	-1.80601	yes
MIA3	0.000266739	1.80591	no
TFDP1	0.000267798	-1.80541	yes
PRDX1	0.000268767	-1.80495	no
LZTR1	0.000269218	1.80474	no
F2R	0.0002721	1.80339	no
HAUS1	0.000275206	-1.80196	no
RNF123	0.000275374	-1.80188	no
TAAR5	0.000282478	-1.79866	no
FCGRT	0.000288058	1.79618	no
KLHL21	0.000289415	1.79558	no
C17ORF48	0.000292115	-1.79441	no
ERGIC1	0.000293677	1.79373	no
CYBA	0.000294577	1.79334	no
TPRA1	0.000295035	-1.79314	no
ETS1	0.000295366	1.793	yes
TSPAN5	0.000296183	-1.79265	no
ARHGAP1	0.000296764	1.7924	no
COPS7A	0.000297911	1.79191	no
ZNF410	0.000299591	-1.79119	no
MYO7A	0.000305538	1.78869	no
PPTC7	0.000313884	1.78526	no
C17ORF39	0.000313936	-1.78524	yes
SGSM1	0.000315959	1.78442	no
TRAPPC5	0.00031678	-1.78409	no
SLC9A3R1	0.00031859	1.78336	no
CAMK1D	0.000318615	1.78335	no
APOBEC3F	0.000319453	-1.78302	no
HPGD	0.000320795	1.78248	no
C16ORF91	0.00032935	-1.77912	no
FLJ42393	0.000335271	1.77684	no
TLN1	0.000335698	1.77667	no
C11ORF48	0.000340107	-1.775	no
ARAP3	0.000344368	1.7734	no
COL4A3BP	0.000345348	1.77304	no
OSTF1	0.000346939	1.77245	no
PDPR	0.000350013	1.77132	no
TMEM60	0.000351195	-1.77088	no
REXO1	0.000351584	1.77074	no
MKRN1	0.000352232	-1.7705	yes
RSC1A1	0.000356003	-1.76914	no
RPS20	0.000357024	-1.76877	no
S100A12	0.000357163	-1.76872	no
CXCR2	0.000361835	1.76704	no
CHAF1B	0.000371411	1.76368	no
RUNDC1	0.000371967	1.76349	no
ZNF442	0.000373142	-1.76308	no
TRIM44	0.000377324	1.76164	no
FCRLA	0.000379758	-1.76081	no
FAM96A	0.000380342	-1.76061	no
TMEM167A	0.00038731	-1.75827	no
AUTS2	0.000390976	1.75705	yes
PIGC	0.000393449	-1.75623	no
HNMT	0.000394886	-1.75576	no
IWS1	0.000397147	1.75502	no
RPA3	0.000404394	-1.75268	yes
ARHGDIB	0.000406827	1.7519	no
IL6R	0.000411451	1.75043	no
S100A7L2	0.000411971	1.75027	no
CREB1	0.000412041	1.75024	no
FAM212B	0.000419873	1.7478	no
CXCL16	0.000420579	1.74758	no
BUD31	0.000421537	-1.74728	no
NR4A2	0.000421602	1.74726	yes
C8ORF59	0.000422109	-1.74711	no
ZNF746	0.000425034	1.74621	no
TNS1	0.00042511	-1.74618	no
LTBR	0.000425535	1.74605	yes
NINJ1	0.000427321	1.74551	no
PSMA4	0.000429184	-1.74494	no
PPDPF	0.000433461	-1.74365	no
RNF44	0.000433503	1.74364	no
THBS1	0.000435566	1.74302	no
REPS1	0.000438385	-1.74218	no
WISP2	0.00043842	1.74217	no
PKHD1	0.000438525	1.74214	no
TTYH2	0.0004401	1.74167	no
NAT10	0.000440905	1.74143	no
VTI1B	0.000441546	-1.74124	no
BRD3	0.00044286	1.74085	no
EPB41	0.000447216	-1.73958	yes
PNKP	0.000447726	1.73943	no
TPD52L3	0.000452128	-1.73815	no
METTL5	0.000453496	-1.73775	no
CD19	0.000454544	-1.73745	no
HBQ1	0.000455369	-1.73721	yes
ADAM21	0.000460999	-1.73561	no
RPL9	0.000461547	-1.73545	yes
ROMO1	0.000462594	-1.73515	no
FRAT2	0.000465096	1.73445	no
ACTB	0.000466968	1.73392	no
KCTD20	0.000467158	1.73387	no
LCP1	0.000470651	1.73289	no
C5ORF4	0.000472732	-1.73231	no
SRGAP3	0.000478339	1.73077	no
ZMYND8	0.000486672	1.7285	no
DIAPH1	0.00048942	1.72776	no
PPRC1	0.000489976	1.72761	no
HBE1	0.000493622	-1.72664	no
PITPNA	0.000494737	1.72634	no
EPN1	0.000495997	1.72601	no
GOLIM4	0.000501652	1.72451	no
CLASP1	0.000505516	1.7235	no
RNASE2	0.000507065	-1.7231	no
RCVRN	0.000508436	1.72275	no
ZNF22	0.000511294	-1.72201	no
EXOSC3	0.000512639	-1.72166	no
VAMP8	0.000514947	-1.72107	yes
TMEM131	0.000536249	1.71571	no
RPS27A	0.000540751	-1.71461	no
RAP1GAP	0.000541736	-1.71437	no
RNF165	0.000541853	1.71434	no
TMEM104	0.000543798	1.71386	no
ADAM8	0.000545058	1.71356	yes
TRAM2	0.000545924	1.71335	no
SNORD33	0.000546914	-1.71311	no
RAB35	0.000548364	1.71276	no
CRK	0.000549605	1.71246	yes
ARHGAP25	0.000563331	1.70919	yes
LMNB2	0.000563674	1.70911	no
GPR146	0.000564067	-1.70901	yes
GNS	0.000572388	1.70707	no
PIP4K2A	0.000573066	-1.70691	yes
LATS2	0.000573314	1.70685	no
TMCO1	0.000578188	-1.70573	no
LRRFIP1	0.000582525	1.70473	no
CORO1B	0.000583346	1.70455	no
CUX2	0.000584652	1.70425	no
C2ORF55	0.000585698	1.70401	no
UIMC1	0.000588166	1.70345	no
LRRC18	0.000590042	-1.70303	no
PVR	0.000594099	-1.70212	no
C12ORF35	0.000595675	1.70176	no
COPS5	0.000596105	-1.70167	no
TGFBI	0.0005974	1.70138	no
PPP2R5B	0.00059915	-1.70099	no
ERCC5	0.000603107	1.70011	no
PPIL3	0.00061311	-1.69792	no
MEIS1	0.000614017	1.69772	no
FAAH	0.000620822	1.69625	no
VPS35	0.00062703	1.69492	no
ADAP1	0.000629841	1.69432	no
GTF2B	0.000633681	-1.6935	no
NCOA6	0.000635522	1.69312	yes
PDE4B	0.000650995	1.68989	no
CHRNA5	0.000653363	1.68941	no
ARHGEF10L	0.000653494	-1.68938	no
FAF2	0.000656979	1.68867	no
TTC23L	0.000657681	-1.68852	no
GABRA2	0.000664084	-1.68722	no
UHRF1	0.000672792	1.68547	no
TMCO6	0.000679765	1.68408	no
DDX23	0.000680282	1.68398	no
CADM4	0.000681912	1.68366	no
TMEM180	0.000684935	1.68307	no
EIF2AK1	0.000685825	-1.68289	no
SYT3	0.000697525	-1.68061	no
CNOT1	0.000698269	1.68047	no
B2M	0.000701211	-1.6799	no
MRPS22	0.00070163	-1.67982	no
RABIF	0.000702105	1.67973	no
HSH2D	0.000703523	1.67946	yes
ZNF467	0.000705857	1.67901	no
COQ7	0.000710246	1.67817	no
RPGRIP1	0.000713726	1.67752	no
SH3BP4	0.000713909	1.67748	no
RAPGEFL1	0.000728091	1.67482	no
PISD	0.000729021	1.67465	yes
NFU1	0.00073222	-1.67406	no
DVL3	0.000733586	1.67381	no
PEX11B	0.000733995	-1.67373	no
AP3D1	0.000737967	1.673	no
ZNF549	0.00074669	1.67141	no
OR2W3	0.000750347	-1.67075	no
CERK	0.000758526	1.66928	yes
ZNF618	0.000759291	1.66914	no
CD93	0.000762944	1.66849	no
AHDC1	0.000764456	1.66822	no
C1ORF170	0.000765399	-1.66806	no
COQ5	0.000776789	-1.66605	no
ERGIC3	0.00080056	-1.66195	no
PHF3	0.000805298	1.66115	no
E2F2	0.00080782	-1.66072	no
SEC14L4	0.000809065	-1.66051	no
JAK1	0.000809456	1.66045	no
TMEM184B	0.00081158	1.66009	yes
CLIP3	0.000813111	1.65983	no
STT3A	0.000817558	1.65909	no
LRRC47	0.000826188	1.65766	no
MAGOH	0.000827392	-1.65746	no
SORCS3	0.00083518	-1.65618	no
SAR1B	0.00084855	-1.65401	yes
DOCK5	0.00084937	1.65388	no
TBC1D22B	0.00085122	-1.65358	no
EEA1	0.000855303	1.65293	no
FAHD1	0.000855988	-1.65282	no
IFNGR2	0.000857496	1.65257	no
TMEM115	0.000859061	1.65233	no
SORL1	0.000859711	1.65222	no
GALNT8	0.000861251	-1.65198	no
PTBP3	0.000864444	1.65147	no
C1ORF21	0.000867621	1.65097	yes
RPS18	0.000868419	-1.65084	no
ARID1A	0.000869382	1.65069	no
PROC	0.000870852	1.65046	no
ZZEF1	0.000878275	1.6493	no
TGFBRAP1	0.000878367	1.64928	no
RNF215	0.000882925	1.64857	no
ZNF434	0.000884698	1.6483	no
NECAB2	0.000887237	1.6479	no
MAP2K1	0.000895526	1.64663	no
NFKBIA	0.000895916	1.64657	yes
STK4	0.000902132	1.64562	no
FAM172A	0.000902146	-1.64562	no
NEU1	0.000904153	1.64531	yes
NOTCH1	0.000905971	1.64504	yes
SGK1	0.000911112	1.64426	no
NGRN	0.000912122	-1.64411	no
CLTB	0.000916697	-1.64342	no
C19ORF77	0.000918194	-1.64319	no
YBX1	0.000920175	-1.6429	no
RUNDC3A	0.000925097	-1.64216	no
ZNFX1	0.000929397	1.64152	no
MYL12B	0.000931961	-1.64115	no
INSR	0.000933844	-1.64087	no
PRSS8	0.000937034	-1.6404	no
UQCRHL	0.000954574	-1.63784	no
CTRC	0.000956341	1.63759	no
HBM	0.000957906	-1.63736	no
FOXD4	0.000959538	-1.63713	no
TRAPPC9	0.000960515	1.63699	no
CUEDC1	0.000968716	1.63581	no
IL1RAP	0.000969177	1.63575	no
LGALS9B	0.000980547	-1.63413	no
C17ORF69	0.000982109	1.63391	no
RNF10	0.00098257	-1.63385	no
CTNNBIP1	0.000984006	1.63365	no
ATP6V0B	0.00098691	1.63324	yes
RNF19B	0.000989744	1.63284	no
VDR	0.000993608	1.6323	no
HIGD1A	0.000995362	-1.63206	yes
FAM116B	0.00100039	-1.63136	no
SLC22A12	0.00100464	-1.63078	no
PIGT	0.00100623	1.63056	no
UCHL3	0.00100813	-1.6303	no
YTHDC1	0.00101061	1.62996	no
RPL13AP6	0.00101913	-1.62879	no
PSME4	0.00101988	-1.62869	no
SLCO3A1	0.00102	1.62867	no
CRIPT	0.00102066	-1.62858	no
SLFN13	0.00102587	1.62788	no
APOA5	0.00102733	-1.62768	no
KAT6B	0.00102767	1.62763	no
SLC16A5	0.00103561	1.62657	yes
STXBP5	0.00105727	1.62369	no
PDE3B	0.00105839	1.62355	yes
TRIM58	0.00106427	-1.62277	yes
YTHDF1	0.00106945	1.6221	no
ATP6V1B2	0.0010715	1.62183	no
ABTB1	0.00107399	1.62151	no
ARHGEF18	0.00107463	1.62143	no
PIPSL	0.00108028	-1.6207	yes
FBLN1	0.00109819	-1.61841	no
TBXAS1	0.00110341	1.61774	no
TRANK1	0.00110444	1.61761	no
PCBD1	0.00110999	-1.61691	no
FOXC1	0.00111134	1.61675	no
ANAPC10	0.00111382	-1.61643	no
DPEP3	0.00112145	1.61548	no
UBB	0.00112445	-1.61511	no
ZFHX3	0.00112773	1.6147	no
RAB3IP	0.00112862	-1.61459	no
ZNF816	0.00113079	-1.61432	no
RXRA	0.00113105	1.61429	no
ACAT1	0.00113365	-1.61397	no
PRRC2C	0.00113959	1.61324	no
LOC284023	0.00114237	1.6129	yes
SLC24A1	0.0011464	1.61241	no
SEMA3E	0.00114695	1.61234	no
DRG1	0.00115458	-1.61141	no
FHL3	0.00115975	1.61078	no
TUBGCP4	0.00116747	1.60986	no
RSL1D1	0.00117037	-1.60951	no
BDKRB1	0.00117325	-1.60916	no
RFWD3	0.00117505	1.60895	no
TRIM14	0.00118239	1.60808	no
SF3B4	0.00118508	1.60776	no
ARHGAP32	0.00118617	1.60763	no
TMEM56	0.00119335	-1.60678	no
SREBF1	0.00119931	1.60608	no
TRIM45	0.00120603	1.6053	no
FBXW8	0.00120859	-1.605	yes
RPS6KA5	0.00120941	1.60491	no
PROSAPIP1	0.00122303	1.60333	no
PELI2	0.00123327	1.60216	no
UBXN6	0.0012565	-1.59953	no
HDDC2	0.00126319	-1.59878	no
C5AR1	0.00126377	1.59872	no
ADCK3	0.0012663	1.59844	no
RBCK1	0.00126638	1.59843	no
FGR	0.00126793	1.59826	no
COMMD10	0.00128157	-1.59675	no
LRTOMT	0.00128261	1.59663	no
KIR3DL3	0.00129036	1.59578	no
RNF103	0.00129567	1.5952	no
SLAMF6	0.00130286	-1.59442	no
MRPS15	0.00130492	-1.5942	no
MCM4	0.00130823	1.59384	no
SSH3	0.00131038	1.59361	no
SLC18A2	0.00131096	1.59354	no
CRLF3	0.00131208	1.59342	no
SF3B5	0.00131575	-1.59303	no
FBXO33	0.00131972	1.5926	no
AQP9	0.0013213	1.59243	yes
HBXIP	0.00132197	-1.59236	no
SLC7A14	0.00132341	-1.59221	no
TMEM2	0.00132796	1.59172	no
CNFN	0.00133306	-1.59118	no
LRRC16B	0.00133781	-1.59068	no
ARCN1	0.00134103	1.59034	no
ABCC2	0.00134372	1.59005	no
TAF9	0.00135195	-1.58919	no
ANO10	0.00135376	1.589	no
RAB40C	0.00136031	1.58831	no
CIDEB	0.00136428	1.5879	no
SLC15A3	0.0013699	1.58732	no
RSRC1	0.00137747	-1.58653	no
NCOR2	0.0013781	1.58647	no
KIAA1324	0.00139416	1.58482	no
SERP2	0.00141259	1.58296	no
NAP1L4	0.00141299	-1.58292	no
ZNF609	0.00142337	1.58188	no
PLCB2	0.00142448	1.58177	no
TRPM1	0.00142725	1.58149	no
SND1-IT1	0.00143125	1.58109	yes
RUFY1	0.00144462	1.57977	no
CYTH1	0.00144494	1.57973	no
BRCA1	0.00144833	1.5794	no
SLC9A1	0.00145308	1.57893	no
ZBTB48	0.00145504	1.57874	no
CMAS	0.00145535	-1.57871	no
IGFBPL1	0.00146648	-1.57763	no
HRSP12	0.00147342	-1.57695	no
CABLES2	0.00147647	1.57666	no
DNAJB2	0.00148644	-1.5757	no
COL6A4P2	0.00148996	-1.57536	no
ZNF773	0.00149522	1.57486	no
ZNF32	0.00149943	-1.57445	no
GUCA1B	0.00152187	1.57233	no
CUX1	0.00152837	1.57172	no
COPZ1	0.00153842	-1.57078	no
CFH	0.00154072	-1.57057	no
C3ORF15	0.00154571	1.5701	no
UBE4B	0.00154641	1.57004	no
KLHL7	0.0015792	-1.56703	no
GLRX3	0.00158131	-1.56684	no
STX8	0.00158619	-1.5664	no
BCL2L12	0.00158939	1.56611	no
XRCC2	0.00162117	1.56326	no
CREB5	0.00162517	1.56291	no
KCNA5	0.00162631	1.56281	no
MRPS24	0.0016286	-1.56261	no
RAB31	0.0016456	1.56111	no
BRK1	0.00166321	-1.55958	no
MBTD1	0.00166683	1.55927	no
DOPEY2	0.00166793	1.55917	no
NCOA2	0.0016692	1.55906	no
PAPPA2	0.00168051	1.55809	no
MIOX	0.00168857	1.5574	no
EEF1D	0.00169109	-1.55718	no
CNOT4	0.00169648	1.55672	no
MBD4	0.00169856	1.55655	no
CREB3L1	0.00171627	1.55505	no
ZNF362	0.00171759	1.55494	no
DCTN6	0.00171767	-1.55493	no
MKNK2	0.00173087	1.55382	no
RIMS3	0.00174246	1.55286	no
BMP2K	0.00174377	-1.55275	no
DHFRL1	0.0017497	1.55226	no
TNNT1	0.00175749	-1.55162	no
SERPINA13	0.00175835	-1.55154	no
SCYL1	0.0017869	1.54921	no
PTTG3P	0.00178976	-1.54898	no
ALKBH5	0.00179349	1.54868	no
ACAT2	0.00179594	-1.54848	no
ASCC2	0.00180904	-1.54743	no
CCNK	0.00180967	1.54737	no
PSMA2	0.00183116	-1.54566	no
MRPS7	0.0018312	-1.54566	no
ORAI3	0.00183412	1.54543	no
NOL10	0.00183959	-1.54499	no
OR4C15	0.00184141	1.54485	no
GPR113	0.00186365	-1.5431	no
LRRC29	0.00186524	1.54298	yes
CCDC28B	0.00187033	-1.54258	no
ERAP2	0.00187677	1.54208	no
FAM174A	0.00187785	1.542	no
MRPL46	0.00188473	-1.54147	no
ABHD6	0.00188594	-1.54137	no
NSFL1C	0.00189854	1.5404	no
SEC23A	0.00189999	1.54029	no
DRGX	0.00190377	-1.54	no
KLK10	0.00190448	-1.53995	no
SPTB	0.00191324	-1.53928	no
HIST3H2BB	0.00192662	-1.53826	no
FAM162A	0.00193039	-1.53798	no
MEF2D	0.00193094	1.53794	no
CD22	0.00194246	-1.53707	no
PRX	0.00194353	-1.53699	no
SLC30A10	0.00194654	-1.53676	no
CD248	0.00194693	1.53673	no
HHLA3	0.00194891	-1.53659	no
GPX3	0.0019531	1.53627	no
HIST1H1D	0.00195817	-1.53589	no
PATL1	0.00196379	1.53547	no
AHR	0.00196398	1.53546	no
TRAPPC4	0.00197511	-1.53463	no
WDR61	0.00197942	-1.53432	no
PSMB1	0.00198037	-1.53425	no
LOC283070	0.00198798	1.53369	no
EIF4A1	0.00199987	1.53281	no
USP12	0.00202316	-1.53112	no
DNAH2	0.00205112	1.52911	no
ZNF277	0.00205359	-1.52893	no
ULK1	0.00205568	1.52878	no
BSDC1	0.00205838	1.52859	no
PRKAG1	0.002069	-1.52783	no
MAP4K2	0.00207223	1.5276	no
TTC17	0.00208201	1.52691	no
SVIL	0.00209043	1.52632	no
SGCE	0.00209446	-1.52604	no
BASP1	0.00210976	1.52497	no
RCN3	0.00211442	1.52464	no
ZCCHC10	0.00211604	-1.52453	no
PRKCZ	0.0021233	1.52403	no
ISG20L2	0.00212376	1.524	no
HSD17B7P2	0.002127	1.52377	no
MGC16703	0.00213556	1.52318	no
NT5C1B	0.00213626	1.52313	no
NAA20	0.00215592	-1.52178	no
PANX2	0.00215908	1.52157	no
KCNK17	0.00216596	1.5211	no
IL1RL1	0.00216953	1.52086	no
DENND3	0.0021731	1.52061	yes
ARL11	0.00217649	1.52039	no
RAB27A	0.00220283	1.51861	no
SCAF11	0.00221645	1.5177	no
TAB1	0.00221687	1.51767	no
CASP8	0.0022206	-1.51743	no
CCDC89	0.00222908	-1.51686	no
ITFG2	0.00222966	1.51682	no
WRAP73	0.00223325	1.51659	no
DSCR3	0.00224198	1.51601	no
COMMD5	0.00224321	-1.51593	no
PILRA	0.00226083	1.51477	yes
TNFRSF11A	0.00227075	-1.51413	no
ADHFE1	0.00228284	1.51334	no
OR13C9	0.00229003	-1.51287	no
H2AFZ	0.00229527	-1.51254	no
GZMA	0.00229636	-1.51247	no
PYGB	0.00230011	1.51222	no
SNHG5	0.00230897	-1.51166	no
TRIM48	0.00231136	1.5115	no
FABP5	0.00232505	-1.51063	no
DCTN1	0.00232767	1.51046	no
MAPK3	0.0023289	1.51038	yes
CHST15	0.00232978	1.51033	no
KDELR1	0.00234978	1.50906	no
JMJD1C	0.00235202	1.50892	no
FKBP8	0.00235233	-1.5089	no
SOD2	0.00235335	1.50883	yes
SNX30	0.00235614	1.50866	no
MXRA7	0.00235903	-1.50848	no
TRPA1	0.00235915	-1.50847	no
ST13	0.00238228	-1.50702	no
CHMP5	0.00238729	-1.50671	no
PRF1	0.00240537	1.50559	yes
C15ORF39	0.00241846	1.50478	no
TSTA3	0.00243428	-1.50381	no
ATP2C1	0.00244459	-1.50318	no
RAB37	0.00244474	1.50317	no
RPL5	0.00245509	-1.50254	no
SUGP2	0.00247013	1.50163	no
MCM2	0.00247128	1.50156	no
TMEM51	0.0024761	-1.50127	no
TBC1D10B	0.00248116	-1.50097	no
HDGFRP2	0.00248926	-1.50048	no
UHMK1	0.00248943	1.50047	no
ALDH5A1	0.00250015	-1.49983	no
CTSS	0.00251092	1.49919	no
SYNE2	0.00252199	1.49853	no
IFRD2	0.00253817	-1.49758	no
EFTUD2	0.00253994	1.49748	no
GLIPR2	0.00254192	1.49736	no
CARM1	0.00254486	-1.49719	no
POLR2J	0.00256302	-1.49612	no
ZNF365	0.00256342	1.4961	no
PBXIP1	0.00260017	1.49397	no
PTGDR2	0.00260111	1.49392	no
AKAP3	0.00262093	-1.49278	no
PIGX	0.00262662	1.49246	no
CETN3	0.00263029	-1.49225	no
HERPUD1	0.00265466	1.49086	no
GHRL	0.00266232	1.49043	yes
NOTUM	0.0026823	-1.48931	no
UBL7	0.00268287	-1.48928	no
EIF3E	0.00269093	-1.48883	no
PIK3C2B	0.00270122	1.48826	no
DAAM2	0.00270483	1.48806	no
ZNF26	0.00272521	-1.48693	no
APBB1IP	0.00272786	1.48678	no
SPAG7	0.00274405	-1.48589	yes
MRC2	0.00274423	-1.48588	no
LILRB2	0.00277034	1.48446	no
KCTD7	0.00279915	1.4829	no
GDF5	0.00280095	1.4828	no
MRPL48	0.00281953	-1.48181	no
FAM120B	0.00281981	1.48179	no
OTOP3	0.00282137	-1.48171	no
GLB1	0.00282835	1.48134	no
MORN1	0.00287085	-1.47909	no
RYR1	0.00287679	1.47877	no
MAN1C1	0.00289492	1.47783	no
C19ORF6	0.00290421	1.47734	no
THOC5	0.00292118	1.47646	no
SEC24C	0.0029419	1.47539	no
PARL	0.00294483	-1.47524	no
ALKBH8	0.00294509	1.47523	no
TYROBP	0.0029468	1.47514	yes
FCER2	0.00294738	-1.47511	no
INTS7	0.00294932	1.47501	no
CCND3	0.00296067	1.47443	no
GBE1	0.00296305	1.47431	no
ZNF821	0.00296305	-1.47431	no
DUSP15	0.00296397	-1.47426	no
ATP5C1	0.00299655	-1.4726	no
RNF34	0.00299776	1.47254	no
HLA-DOB	0.00299938	-1.47246	no
NIF3L1	0.00299988	-1.47244	no
STARD3	0.0030057	1.47214	no
PPID	0.00300575	-1.47214	no
HNRNPM	0.00301152	1.47185	no
NIPAL3	0.00302683	1.47108	no
BCL7C	0.00303395	-1.47072	no
E2F3	0.00303823	1.47051	no
XPNPEP3	0.0030387	1.47049	no
C20ORF152	0.00304403	1.47022	no
WHAMMP2	0.00304974	-1.46994	no
TMEM154	0.00305515	1.46967	no
CYYR1	0.00306227	1.46931	no
KIAA0240	0.003063	1.46928	no
FBXO8	0.00306448	-1.4692	no
ASF1B	0.00307919	1.46848	no
PLEKHB2	0.00307943	1.46846	no
SIN3A	0.00308038	1.46842	no
TNFRSF9	0.00308921	1.46798	no
ATP8B4	0.00308984	1.46795	no
NSMCE1	0.00311228	-1.46685	no
U2AF2	0.003115	1.46672	no
MUC6	0.00311575	-1.46668	no
INPP5D	0.00313869	1.46557	no
KIAA0913	0.00314797	1.46512	no
FAM163A	0.00315498	-1.46478	no
PWWP2B	0.00315971	-1.46455	no
SLC7A5	0.00317313	-1.4639	yes
ZNF446	0.00319146	1.46303	no
LGALSL	0.00319763	1.46273	no
SCAMP2	0.00320476	1.46239	no
GPR176	0.00321764	-1.46178	no
CTBS	0.00322018	1.46166	no
TRAF3IP2	0.00322212	1.46157	no
ZNF367	0.00324051	-1.4607	no
ARHGAP20	0.00325258	1.46013	no
GSTM1	0.00325414	-1.46006	no
VCP	0.00326266	1.45966	no
OR10J1	0.00326712	-1.45945	no
C5ORF20	0.00327447	1.45911	no
RPS12	0.00327892	-1.4589	no
DCUN1D5	0.0032895	-1.45841	no
PARVG	0.00329032	1.45837	no
LRRC57	0.00330684	1.4576	no
PRAM1	0.00331022	1.45745	no
KIAA2026	0.00331118	1.4574	no
TM9SF4	0.00331264	1.45734	no
NFKB1	0.00332085	1.45696	no
COPS3	0.00335551	-1.45537	no
HPS5	0.00336063	1.45514	no
PIK3CD	0.00336716	1.45484	no
DENND4A	0.00336848	1.45478	no
DDX51	0.00338196	1.45417	no
ITGAM	0.00338263	1.45414	no
TSEN34	0.00338752	1.45391	yes
SPTA1	0.00340216	-1.45325	no
SERPINE2	0.00342592	1.45219	no
TBC1D13	0.0034352	1.45177	no
NXNL1	0.00346313	1.45053	no
DLGAP1	0.00347279	-1.4501	no
DECR2	0.0034778	1.44988	no
SLC1A5	0.00348142	-1.44972	no
C9ORF78	0.00348802	-1.44943	no
LINC00483	0.00348974	-1.44935	no
RAB8A	0.00349965	1.44892	no
NGDN	0.00351233	-1.44836	no
DPY19L3	0.00353362	1.44743	no
PAPSS2	0.00355608	1.44646	no
RYR3	0.00356544	1.44605	no
TMEM145	0.00357881	-1.44548	no
DUSP2	0.00359069	1.44497	yes
NKAIN2	0.00361606	1.44388	no
FLOT2	0.00362372	1.44355	no
ZMYND15	0.00363463	1.44309	no
FRAT1	0.00363644	1.44301	no
ST3GAL4	0.00364107	1.44282	no
TSPO2	0.00365137	-1.44238	no
WDR48	0.0036543	-1.44226	no
FAM117A	0.00368238	-1.44108	no
NUBPL	0.00371414	1.43975	no
C19ORF12	0.00371864	1.43956	no
C11ORF74	0.00372308	-1.43938	no
KIAA1609	0.00372554	1.43928	no
ARPC3	0.00374705	-1.43839	no
LINGO2	0.00374738	1.43837	yes
IRF3	0.00375268	-1.43815	no
SLC25A38	0.00375921	-1.43788	no
CAP1	0.00376121	1.4378	no
OR2AG1	0.00376776	-1.43753	no
COX4I1	0.00378142	-1.43697	no
THBD	0.00378599	1.43679	no
ITGA5	0.0037866	1.43676	no
ISLR2	0.00380171	1.43614	no
TNFRSF18	0.00381682	1.43553	no
NWD1	0.00382353	1.43526	no
AKTIP	0.00384117	1.43454	no
CACNA1I	0.00384526	1.43438	yes
MMP2	0.00384647	-1.43433	no
RPS9	0.00385082	-1.43415	no
TBC1D14	0.00386028	1.43377	no
CFHR2	0.00386349	-1.43365	no
CES2	0.00386628	1.43353	no
RSL24D1	0.00386704	-1.4335	no
SLC25A36	0.00387558	1.43316	no
TAP2	0.00387832	1.43305	no
EPB41L4A-AS1	0.0038891	-1.43262	no
STAT6	0.00391405	1.43163	no
SDF2	0.00391689	-1.43151	no
AMICA1	0.00392149	1.43133	no
UBE2V1	0.00393389	-1.43084	no
OC90	0.00394149	1.43054	no
IP6K3	0.00395308	-1.43009	no
SHMT1	0.00396435	1.42964	no
SNORD68	0.00398951	-1.42866	no
LAT	0.00399009	-1.42864	no
CERKL	0.00399696	-1.42837	no
ATP6AP1L	0.0040121	-1.42778	no
KLF13	0.00402791	1.42717	no
GNAQ	0.00402925	1.42712	no
C19ORF66	0.00403769	-1.42679	no
EMILIN2	0.00403797	1.42678	no
ITM2C	0.00405886	1.42598	yes
ABL1	0.00406248	1.42584	no
UQCR10	0.00407789	-1.42525	yes
KIAA0182	0.00408624	1.42493	no
CBLB	0.00409045	1.42477	yes
AFF4	0.00409439	1.42462	no
CDC42EP2	0.00412255	1.42355	no
CD79B	0.0041519	-1.42244	no
ASTN1	0.00415523	-1.42231	no
CDH16	0.00416465	-1.42196	no
PLEKHM1	0.00417915	1.42142	no
GLUL	0.00418988	-1.42102	yes
2009-09-01	0.00419617	1.42078	no
CHMP6	0.00421862	1.41995	yes
RAD9A	0.00422157	1.41984	no
PLVAP	0.00422274	-1.4198	no
ADSL	0.00423586	-1.41931	no
SLC16A3	0.0042363	1.41929	no
TNFRSF1B	0.00424696	1.4189	no
TBCE	0.00425226	-1.41871	no
CLEC14A	0.00426486	-1.41824	no
LMLN	0.00427112	1.41801	no
COPA	0.00427711	1.41779	no
DHX16	0.0042783	1.41775	no
NDUFS3	0.00428063	-1.41766	no
RPS6	0.00432409	-1.41608	no
PHF13	0.00433104	1.41583	no
LIPI	0.00433149	1.41581	no
SETX	0.00434787	1.41522	no
SNORD46	0.00434887	-1.41519	yes
SERTAD2	0.00435007	1.41514	no
COL14A1	0.00435526	-1.41496	no
CNPPD1	0.00435868	-1.41483	no
NDUFAF4	0.00437137	-1.41438	no
PTPRO	0.00438354	-1.41394	no
SMPDL3A	0.00439431	1.41355	no
FZD2	0.00440289	1.41325	no
CIAO1	0.00440316	1.41324	no
SEC61G	0.00440584	-1.41314	yes
TNFSF14	0.00440708	1.4131	yes
USMG5	0.00442073	-1.41261	no
DEXI	0.00442602	-1.41242	no
COL6A2	0.00443291	1.41218	no
ISLR	0.0044376	-1.41201	no
LAT2	0.00443927	1.41196	yes
LINC00493	0.00444867	-1.41162	no
OR2C3	0.00448007	-1.41052	no
TSHZ3	0.00448085	1.41049	no
TMIGD2	0.00448663	1.41029	no
CD14	0.00451482	1.4093	no
REM2	0.00454137	1.40838	yes
SF3B2	0.00455079	1.40805	no
RAVER1	0.00456262	1.40764	no
ZNF346	0.00457152	1.40733	no
GAST	0.00457845	1.4071	no
APOA2	0.00457904	1.40708	no
CD7	0.00458104	1.40701	yes
TMF1	0.00458974	1.40671	no
DZIP3	0.00459535	1.40652	no
NLRP7	0.00459987	1.40636	no
CABP4	0.00460388	1.40622	no
SUCLG1	0.00461197	-1.40595	no
TGFBR2	0.00461985	1.40568	no
LTB4R	0.0046292	1.40536	no
RTF1	0.00464078	-1.40496	no
PTGDS	0.00464913	1.40468	no
ZNF219	0.00465763	1.40439	no
TMCO3	0.00465823	1.40437	no
KATNB1	0.00466245	1.40423	no
FAM57A	0.00467648	1.40375	no
ZNF428	0.00468182	-1.40357	no
GNL3	0.00469081	-1.40327	no
CSK	0.00469947	1.40298	no
PLEKHM2	0.00470612	1.40275	no
GTF3A	0.00470736	-1.40271	no
TPD52L2	0.00471397	1.40249	yes
FUT10	0.00473466	1.4018	no
SULT1C4	0.00476465	-1.4008	no
GAD2	0.00476492	-1.40079	no
SFMBT2	0.00478233	1.40021	no
SNAPC1	0.00479257	1.39988	no
FAU	0.00479664	-1.39974	no
TRABD	0.00481108	1.39926	no
TGOLN2	0.00483181	1.39858	no
TJP2	0.00483265	1.39856	no
ZNF398	0.00486423	-1.39752	no
CNIH4	0.00487034	-1.39732	no
FOXJ3	0.00487176	1.39728	no
RAB42	0.00487419	-1.3972	no
SUV39H2	0.00490081	-1.39634	no
TRAPPC2L	0.004906	-1.39617	no
EIF1B	0.00490841	-1.39609	no
ALOX5	0.00491829	1.39577	no
C14ORF129	0.00494595	-1.39488	no
ATP6V0A1	0.0049493	1.39477	no
TASP1	0.00495447	1.39461	no
SNX1	0.00495457	1.3946	no
N4BP1	0.00495637	1.39455	no
VWCE	0.00497282	-1.39402	no
NCAPD2	0.004999	1.39318	no
BDNF	0.00502761	-1.39228	no
ARPC1A	0.00503	1.3922	no
MFSD2B	0.00503595	-1.39201	no
CDCP1	0.00504526	-1.39172	no
CCDC66	0.00505539	-1.3914	no
EGFL7	0.00506529	1.39109	no
FAM159A	0.0050679	-1.39101	no
PPP2R3A	0.00506983	1.39095	no
PRR14	0.0051103	1.38968	no
JMJD6	0.00511165	-1.38964	no
GATAD2A	0.00511374	1.38957	no
LRP5L	0.00512047	1.38936	no
RFX7	0.00513361	-1.38895	no
SH2D2A	0.00514972	1.38846	no
LOC440944	0.00515284	1.38836	no
CGA	0.00515309	-1.38835	no
FAM65B	0.00515615	1.38826	no
LPAR6	0.00515778	-1.38821	no
LYZL6	0.00516325	-1.38804	no
DPYSL2	0.00516501	1.38798	no
C4ORF26	0.00517736	1.3876	no
PTMS	0.00517777	-1.38759	no
SLC5A5	0.00518159	-1.38747	no
RNASET2	0.00519254	1.38713	no
B4GALT3	0.00521337	-1.3865	no
CSDAP1	0.00522814	-1.38604	yes
WNT4	0.00523112	-1.38595	no
ZNF782	0.00527413	1.38464	no
HOXC10	0.00527538	-1.38461	no
CCDC28A	0.0052826	1.38439	no
TYK2	0.00528374	1.38435	no
MARK2	0.00528421	1.38434	no
ANKRD30B	0.00529366	1.38405	no
WSB1	0.00529425	1.38404	no
LRWD1	0.00530473	1.38372	no
LLGL2	0.00531178	-1.38351	no
ZNF883	0.00531874	1.3833	no
PAM	0.00532212	1.3832	no
ATP10D	0.00533277	1.38288	no
ITPRIP	0.00534009	1.38266	no
SPA17	0.00534143	-1.38262	no
HADHA	0.00541119	1.38054	no
SLPI	0.00542105	-1.38025	yes
GNAI2	0.00542862	1.38002	no
ARHGAP30	0.00544532	1.37953	no
ANPEP	0.00544586	1.37952	no
ODC1	0.00547084	-1.37878	no
ATXN2	0.00549938	1.37795	no
SEC22B	0.00550248	-1.37786	no
ULK4P2	0.00551011	-1.37763	no
ATP6V1G1	0.00551255	-1.37756	no
YTHDF3	0.00552841	-1.3771	no
GJC2	0.00553898	-1.37679	no
ECSIT	0.00555163	-1.37643	no
FOXRED2	0.0055535	1.37637	no
NLRP12	0.00555956	1.3762	yes
DTHD1	0.00557013	1.37589	no
NDUFB5	0.00557591	-1.37573	no
ISYNA1	0.00560665	1.37484	no
CD163	0.00563372	1.37407	no
C1ORF122	0.00563526	-1.37402	no
CLDN5	0.00564618	1.37371	no
FAM131A	0.00565117	1.37357	no
SIRPA	0.00565787	1.37338	no
C9ORF11	0.00566632	1.37314	no
MAML1	0.00567632	1.37286	no
TNIK	0.00573456	1.37121	no
CCDC15	0.00580995	-1.36911	no
FIZ1	0.00582354	1.36873	no
PAFAH1B3	0.00582971	-1.36856	no
POFUT2	0.00583771	1.36834	no
VWA3B	0.0058431	-1.36819	no
RPL21P44	0.00585202	1.36794	no
UBQLN1	0.00587973	1.36718	no
HCST	0.00588324	1.36708	no
HTR1E	0.00589595	-1.36673	no
SLC6A4	0.00590188	1.36657	no
ZNF274	0.00592791	1.36586	no
C2ORF53	0.00594556	-1.36538	no
ARMC10	0.00594591	-1.36537	no
KIF21B	0.005965	1.36485	yes
DHRS7B	0.00597642	1.36454	no
MLLT6	0.00598136	1.36441	no
C10ORF54	0.00598251	1.36438	no
WDR4	0.00601076	1.36361	no
MAP2K5	0.00603685	1.36291	no
CEBPG	0.00605574	-1.36241	no
GPSM2	0.00606641	1.36212	no
SLC25A31	0.00607072	-1.36201	no
DUSP6	0.0060736	1.36193	no
OR8J3	0.00607727	-1.36183	no
PTX4	0.00608173	-1.36171	no
NR3C1	0.00609087	-1.36147	no
AFAP1	0.00610374	-1.36113	no
ANXA11	0.00613416	1.36032	no
SLC2A2	0.00614672	-1.35999	no
ALDOA	0.00616805	1.35943	no
IFNA6	0.00617558	1.35923	no
EVI5	0.0061766	1.3592	no
BCL2L11	0.0061933	1.35876	no
TRPM6	0.00621049	1.35831	yes
CADPS2	0.00621124	-1.35829	no
NR2C2	0.00621714	1.35814	no
AKR1D1	0.00622102	1.35804	no
IRF2BPL	0.00624733	1.35735	no
AMDHD2	0.00626916	1.35678	yes
REEP6	0.00628309	1.35642	no
CSRNP1	0.00633429	1.3551	no
FAM53B	0.00634724	1.35477	no
C19ORF54	0.00635411	1.35459	no
SCHIP1	0.00639044	1.35366	no
NFKBIB	0.00639212	1.35362	no
TMEM242	0.00640511	-1.35329	no
LPAR3	0.00640585	1.35327	no
MPI	0.0064159	1.35302	no
SLC2A9	0.00643637	1.3525	no
COL4A2	0.0065121	-1.35059	no
DDT	0.0065146	-1.35053	no
TREM1	0.00652055	1.35038	no
SCCPDH	0.0065212	1.35036	no
GPBP1L1	0.00656072	1.34937	no
LEPREL1	0.00656427	1.34929	no
VSIG8	0.00656835	1.34918	no
HDLBP	0.00659712	1.34847	no
CHMP1B	0.00662036	1.3479	no
UNC13D	0.00662277	1.34784	no
QRICH1	0.00662985	1.34766	no
ARVCF	0.00663601	-1.34751	no
NHP2L1	0.00666642	-1.34676	no
RASSF2	0.00666754	1.34673	no
DGCR2	0.00667066	1.34666	no
PMM1	0.00667128	1.34664	no
NFYB	0.0066874	1.34625	no
LIMK1	0.00669219	1.34613	no
ZNF236	0.00670324	1.34586	yes
MBP	0.00675384	1.34463	no
CDK19	0.00682549	1.3429	no
EAF2	0.00682994	-1.34279	no
NDUFA9	0.00684281	-1.34248	no
GIMAP7	0.00684996	-1.34231	yes
CRY1	0.0068614	1.34204	no
EPHB2	0.00688335	-1.34151	no
CELF2	0.00691869	1.34067	yes
FBXO32	0.00692884	1.34043	no
C1QBP	0.00694232	-1.34011	no
BATF	0.00695559	-1.3398	no
NENF	0.00702046	-1.33827	no
SLC7A8	0.00702636	-1.33813	no
SLED1	0.00703433	-1.33795	no
PRICKLE2	0.00708148	1.33685	no
RPL23A	0.00708493	-1.33677	no
SCAF4	0.00709472	1.33654	no
PSMB3	0.0071202	1.33595	no
LEMD2	0.00713888	1.33552	no
NUMA1	0.00714509	1.33537	no
ALMS1P	0.00714534	-1.33537	no
IL37	0.0071465	1.33534	no
IER5L	0.00719483	1.33423	no
ZBTB8OS	0.00720771	-1.33393	no
TMEM165	0.00721381	-1.3338	yes
MAP1LC3A	0.00722774	1.33348	no
WDR47	0.0072291	1.33345	no
BPNT1	0.00723711	-1.33326	no
MLST8	0.00724708	1.33304	no
NISCH	0.0072496	1.33298	no
ZSWIM1	0.00726064	1.33273	no
CSMD3	0.00727122	-1.33249	no
SPECC1L	0.00727339	1.33244	no
FCGR3A	0.0073043	-1.33174	no
SLC4A5	0.00731666	1.33146	no
CPXM1	0.00733272	-1.3311	no
CNPY2	0.00734001	-1.33093	no
ALKBH4	0.00734636	1.33079	no
TRDN	0.0073652	-1.33037	no
NCAN	0.00736751	-1.33031	no
TSPAN2	0.00736817	1.3303	no
CTSG	0.00737786	1.33008	no
WIBG	0.00740259	-1.32953	no
DENND5A	0.00741926	1.32916	no
LPCAT3	0.00746259	1.32819	no
TTR	0.00749209	-1.32754	no
RDH13	0.00749591	1.32745	no
OR8B4	0.00750132	1.32733	no
ASH1L	0.00750235	1.32731	no
ZNF541	0.00753351	1.32662	no
IREB2	0.0075516	1.32623	no
ARHGAP18	0.00758112	1.32558	no
ASAP1	0.00759208	1.32534	no
GAK	0.00761489	1.32484	no
C1ORF55	0.00766282	1.3238	no
PARP4	0.00767521	1.32353	no
MKI67IP	0.00769583	-1.32309	no
PIP4K2C	0.00770082	1.32298	no
THAP11	0.00770868	1.32281	no
CWF19L1	0.007775	1.32139	no
NIPBL	0.00779516	1.32096	no
TNFAIP2	0.00781427	1.32055	no
RLN2	0.00781985	-1.32043	no
CBX7	0.00782518	1.32032	no
GPRC6A	0.0078301	-1.32021	no
TM6SF1	0.00784753	1.31984	no
CPPED1	0.00787631	1.31923	no
GOSR1	0.00787975	1.31916	no
RPL32	0.00788211	-1.31911	no
PARD3B	0.00795942	-1.31748	no
PIGP	0.00796131	-1.31744	no
CD200	0.00797564	-1.31714	no
TM2D1	0.00804469	-1.31571	no
AP3B1	0.00805488	1.3155	no
RG9MTD3	0.00806769	1.31523	no
ATP5S	0.00807694	-1.31504	no
CLEC16A	0.00809113	1.31475	no
ANKRD11	0.00811674	1.31422	no
ZCCHC4	0.00815194	-1.31349	no
ZNF573	0.00816604	1.31321	no
RNASE10	0.00817159	-1.31309	no
TTPAL	0.00817246	1.31307	no
MIR600HG	0.00817641	-1.31299	no
CCRN4L	0.00817697	1.31298	no
SPTLC2	0.00818888	1.31274	no
OR4C3	0.00819654	-1.31258	no
PSMA3	0.0082095	-1.31232	no
DPYSL5	0.00821202	-1.31227	no
PTCD3	0.0082211	1.31208	no
MAP3K3	0.00823914	1.31172	no
ACTR1A	0.00824031	1.31169	no
KLK7	0.00825766	-1.31134	no
CORO1A	0.00826677	1.31116	no
MRPL47	0.00829677	-1.31055	no
COASY	0.00829791	1.31053	no
C22ORF13	0.00832257	-1.31003	no
PSMD4	0.00834179	-1.30964	no
XKR8	0.00835102	1.30946	no
TARM1	0.00838045	-1.30887	no
TOP3A	0.00838556	1.30877	no
SEC23B	0.00838653	1.30875	no
KCNA3	0.00839052	1.30867	no
LOC81691	0.00840484	1.30838	no
DNMT3B	0.00840778	-1.30832	no
RPL29P2	0.00846172	-1.30725	no
MLLT1	0.00846878	1.30711	no
SORBS2	0.00848704	1.30675	no
TOR1AIP1	0.00852109	1.30608	no
DERL2	0.00852611	1.30598	no
SGPP1	0.00853023	1.3059	no
GCAT	0.00853066	-1.30589	no
SMAP2	0.0085359	1.30578	yes
PLIN4	0.00855166	1.30547	no
CXCL10	0.00855468	-1.30541	yes
ACACB	0.00856534	1.30521	no
MPZL1	0.00858818	1.30476	no
PIGK	0.00859294	-1.30466	no
C17ORF64	0.00863436	-1.30386	no
NSMCE4A	0.00863641	-1.30382	no
ZNF333	0.00864271	1.30369	no
BAG3	0.00872381	1.30212	no
CTNNA1	0.00872397	1.30212	no
MRPS18A	0.00872806	-1.30204	no
ANP32AP1	0.00873022	1.302	no
SLC38A11	0.00875172	-1.30158	no
SYK	0.00877571	1.30112	no
TRPM7	0.00878406	-1.30096	no
RAB20	0.00880103	1.30064	no
OTX1	0.0088127	1.30041	no
TMEM9B	0.00881296	-1.30041	no
MED28	0.00881786	-1.30032	no
RPL36	0.00881987	-1.30028	yes
KCTD4	0.00883535	1.29998	no
MBOAT2	0.00886501	1.29942	no
PHLDA1	0.0088831	1.29907	no
SOCS1	0.00890942	1.29857	yes
DGKQ	0.00891701	1.29843	no
C1ORF111	0.00892308	1.29832	no
ZCCHC8	0.00893181	1.29815	no
SNX19	0.00893224	1.29814	no
TST	0.008946	1.29788	no
PSG11	0.00895399	1.29773	no
ETFB	0.00897096	-1.29741	no
BRPF1	0.00897792	1.29728	no
IRGQ	0.00898536	1.29714	no
SLC16A13	0.00901278	-1.29663	no
SYNRG	0.00902276	1.29644	no
TMEM17	0.00907451	1.29547	no
C11ORF95	0.00909343	-1.29512	no
DNAJC1	0.00910695	-1.29487	no
RBM5	0.00911975	1.29463	no
ISM1	0.00916585	1.29378	no
APAF1	0.0091686	1.29373	no
BIRC3	0.00916909	-1.29372	no
CPXM2	0.00918937	-1.29334	no
LINC00167	0.00922385	-1.29271	no
SLC7A5P2	0.00923388	1.29253	no
DPF2	0.00924393	1.29234	no
MOG	0.00929579	-1.29139	no
UBXN2A	0.00931216	1.2911	no
ZNF653	0.00931753	-1.291	no
NUP93	0.00932261	1.29091	no
CNNM3	0.00932821	1.2908	no
DCAF4L1	0.00938464	-1.28978	no
ZBTB34	0.00939377	1.28962	no
TIPARP	0.00943745	1.28883	no
ADRA2B	0.00943972	-1.28879	no
HBZ	0.00945508	-1.28851	no
MCOLN1	0.00946294	-1.28837	no
SLC30A3	0.00946633	-1.28831	no
BRD8	0.009495	1.2878	no
COMMD1	0.00949683	-1.28776	no
YWHAZ	0.00949729	1.28775	no
RNF150	0.00949752	1.28775	no
MARCH3	0.00951222	-1.28749	no
HSPA5	0.00951457	1.28745	no
RIOK2	0.00953038	-1.28716	no
KCTD13	0.00955799	1.28667	no
RAB6B	0.00957108	1.28644	no
SSH2	0.00960204	1.28589	no
TLL2	0.00960449	1.28585	no
ESPN	0.00962395	-1.2855	no
SUGP1	0.00966014	1.28486	no
TMEM119	0.00966643	1.28475	no
CNN2	0.00966794	1.28473	no
HSP90B1	0.00968521	1.28442	no
MEP1A	0.00974618	-1.28335	no
EIF4E2	0.00977502	-1.28285	no
KRT81	0.00978625	1.28265	no
ZNF703	0.00987236	1.28116	no
LLGL1	0.00989255	1.28081	no
FAM126B	0.00989437	1.28078	no
B3GNT2	0.00995059	1.27981	no
DHRS3	0.00995692	1.2797	no
PRPF19	0.00998527	1.27922	no
AP1G1	0.00999682	1.27902	no
EPS15L1	0.0100021	1.27893	no
STAM	0.0100206	1.27861	no
BPIFC	0.0100355	1.27836	no
CD55	0.0100394	1.27829	no
SSTR2	0.0100762	1.27767	no
KCNH2	0.0100766	-1.27766	no
NUMB	0.0100887	1.27746	no
REL	0.0101464	1.27648	no
SRRT	0.0101495	1.27643	no
BTN3A2	0.0101579	1.27629	no
TSPAN1	0.0101641	-1.27618	no
EFCAB2	0.0101711	-1.27606	no
SAMHD1	0.0101833	-1.27586	no
CD1B	0.010187	1.2758	no
MAST4	0.0101897	-1.27575	no
TNK2	0.0102135	1.27535	no
DHX8	0.0102175	1.27528	no
RUNX1	0.0102302	1.27507	no
CLSTN1	0.0102472	1.27479	no
TTF1	0.0102682	1.27444	no
LAMP5	0.0102791	1.27425	no
LRRC49	0.0102798	1.27424	no
C9ORF40	0.0102815	-1.27421	no
PECAM1	0.0102895	1.27408	no
SORCS1	0.010311	-1.27372	no
RAD1	0.0103162	-1.27364	no
ZNF234	0.0103182	1.2736	no
CTNND1	0.010322	-1.27354	no
C8ORF40	0.0103377	-1.27328	no
ENPP2	0.0103503	1.27307	no
ZNF776	0.0103608	1.2729	no
MINA	0.0103622	-1.27287	no
PURB	0.0104367	1.27164	no
SBF1	0.0104389	1.27161	no
LYRM5	0.0104591	-1.27128	no
LINC00239	0.0104606	-1.27125	no
LOC80054	0.0105675	-1.2695	no
DND1	0.0105863	1.2692	no
ZNF607	0.0106214	-1.26863	no
BRD4	0.0106344	-1.26842	no
CCR3	0.0106405	1.26832	no
C10ORF114	0.0106696	-1.26785	no
PIAS1	0.0106892	1.26753	no
HGS	0.0107095	1.26721	no
PLEKHN1	0.0107107	1.26719	no
ATXN7L2	0.0107133	1.26715	no
SYT12	0.0107191	-1.26705	no
RRAGA	0.0107214	-1.26702	no
CSPG4	0.010733	-1.26683	no
DCN	0.0107547	1.26648	no
TACSTD2	0.0108249	1.26536	no
PTGER3	0.0108273	1.26532	no
HSPB2	0.0108293	-1.26529	no
TFR2	0.0108302	-1.26528	no
CSNK1E	0.0108323	1.26524	no
MAML3	0.0108367	1.26517	no
C1ORF87	0.0108417	1.26509	no
THOC6	0.0108472	1.26501	no
FBL	0.0108752	-1.26456	yes
GABRB2	0.0109017	-1.26414	no
FAM135B	0.0109399	1.26354	no
CHST3	0.0109762	-1.26296	no
OR4K1	0.0110405	1.26196	no
RALB	0.0110485	1.26183	no
CLNS1A	0.0110781	-1.26137	no
SERP1	0.0110917	-1.26116	no
ABHD10	0.0110957	-1.26109	no
ARL6IP6	0.0111228	1.26067	no
LAMTOR3	0.0111403	-1.2604	no
RALYL	0.0111871	-1.25967	no
CXCR1	0.0111939	1.25957	no
FAR2	0.0112106	1.25931	yes
MYO7B	0.011223	1.25912	no
EMR2	0.0112258	1.25908	no
PHC2	0.0112563	1.25861	yes
AKAP17A	0.0112736	1.25834	no
OR1J4	0.0112953	-1.25801	no
GGCX	0.0113206	1.25762	no
LONP2	0.0113351	1.2574	no
PINK1	0.0113541	-1.25711	no
B3GNT1	0.01136	1.25702	no
CANT1	0.0113618	1.25699	no
CDK18	0.0113681	-1.2569	no
DNAJA1	0.0113736	-1.25681	yes
NPC1L1	0.0113747	-1.25679	no
LDB2	0.0113853	1.25663	no
SPINK2	0.0113903	-1.25656	no
EEF1E1	0.011391	-1.25655	no
ST6GALNAC2	0.0113986	1.25643	no
FARSA	0.0114001	1.25641	no
RAB6A	0.0114252	-1.25603	no
NAGA	0.0114337	1.2559	no
P2RY2	0.0114563	1.25555	no
C9ORF123	0.0114564	-1.25555	no
NOTCH3	0.011465	1.25542	no
BCL6	0.0115051	1.25482	yes
RBM18	0.011507	-1.25479	no
GZMK	0.0115212	-1.25457	no
RGS14	0.0115244	1.25453	no
INTS4	0.011542	1.25426	no
PPM1B	0.0115492	1.25415	no
BCL10	0.0115651	1.25391	no
RPL13A	0.0115713	-1.25382	no
BRIX1	0.0115781	-1.25372	no
RNF7	0.0115825	-1.25365	no
ENPEP	0.0116298	-1.25294	no
DDX19A	0.0116468	1.25269	no
HBBP1	0.0116562	-1.25255	no
SLC45A4	0.0116687	1.25236	yes
HNRNPH3	0.0116819	1.25217	no
NAE1	0.0116835	-1.25214	no
ROGDI	0.0116886	-1.25207	no
MED29	0.0117002	1.25189	no
APOC1	0.0117163	-1.25166	no
FLII	0.0117242	1.25154	no
SC5DL	0.0117347	-1.25138	no
RASD1	0.0117493	1.25117	yes
GPN3	0.0117617	1.25098	no
TXNRD1	0.0117722	1.25083	no
MTHFD2	0.011787	-1.25061	no
TTYH3	0.0118376	1.24986	no
AQP11	0.0118379	1.24986	no
MGAT5B	0.0118413	1.24981	no
PDCD5	0.0118573	-1.24957	no
WDR91	0.0118587	1.24955	no
COX7A1	0.0118631	-1.24949	no
LSMD1	0.0118757	-1.2493	no
ANKRD46	0.0118823	-1.24921	no
RFK	0.0118991	-1.24896	no
TRIM38	0.0119121	1.24877	no
GSTA2	0.0119223	1.24862	no
MTCH1	0.0119283	1.24853	no
CELF1	0.0119565	1.24812	no
SEPW1	0.0119581	-1.2481	no
IGSF21	0.0120113	1.24732	no
CRABP2	0.0120196	1.2472	no
UQCRB	0.0120325	-1.24702	yes
ANKRD9	0.012046	-1.24682	yes
C5	0.0120759	-1.24639	no
CLRN1	0.0120804	-1.24632	no
SHD	0.0120856	1.24625	no
INCA1	0.0121054	1.24596	no
CHMP7	0.012124	1.24569	no
GMCL1	0.0121319	1.24558	no
LCN2	0.0121539	-1.24526	yes
AFF1	0.0121562	1.24523	no
SMAD3	0.0121888	-1.24476	no
RPS11	0.0121937	-1.24469	no
SLC46A2	0.0122035	1.24455	no
SCAP	0.012209	1.24447	no
MARCO	0.0122122	-1.24443	no
GPR179	0.0122671	-1.24364	no
IGSF6	0.0122733	1.24355	no
ITGB5	0.0123034	1.24312	no
SESN1	0.0123693	-1.24219	no
ZNF394	0.0123705	1.24217	no
HEATR1	0.012381	-1.24202	no
TECPR1	0.012392	1.24187	no
KLHL11	0.01243	-1.24133	no
AK2	0.0124722	1.24074	no
HOPX	0.0124955	-1.24041	no
UBQLN3	0.0125417	-1.23976	no
KBTBD7	0.0125444	1.23973	no
C17ORF50	0.0125483	-1.23967	no
UGGT1	0.0125546	1.23958	no
EMP1	0.0125807	1.23922	no
EEF1A2	0.0126867	1.23775	no
RBM20	0.0127284	1.23717	no
ADAT1	0.0127425	1.23698	no
LOC729603	0.0127505	1.23687	no
LGALS2	0.0127758	-1.23652	no
MAGI2	0.0127982	1.23621	no
TAS2R4	0.0128062	-1.2361	no
OTOR	0.0128068	-1.23609	no
POLR3B	0.0128108	1.23604	no
SNRK	0.012815	1.23598	no
DEF8	0.0128444	1.23558	yes
HEY1	0.0128531	1.23546	no
NEU4	0.0128594	1.23537	no
C20ORF197	0.0128731	1.23518	no
S100A10	0.0128963	1.23487	no
KLC2	0.012904	-1.23476	no
RBPJL	0.0129044	1.23476	no
PDK1	0.0129122	-1.23465	no
CLINT1	0.0129448	1.23421	no
C19ORF40	0.0129565	1.23405	no
ECI1	0.0129622	-1.23397	no
RRP12	0.0129879	1.23362	no
NAV1	0.0129922	1.23356	no
TMEM140	0.0130017	1.23344	yes
PLEKHG4	0.0130056	1.23338	no
TTLL5	0.013009	1.23334	no
USP13	0.0130253	1.23312	no
STK11	0.0130257	-1.23311	no
RNF216	0.0130301	1.23305	no
BAZ1B	0.0130538	1.23273	no
INPP5A	0.01306	1.23265	no
C16ORF62	0.0130644	1.23259	no
IDE	0.0130721	1.23248	no
RYBP	0.0130823	1.23235	no
AGSK1	0.0131155	-1.2319	no
FAM13A	0.0131692	-1.23118	no
KBTBD8	0.0131874	-1.23094	no
HIVEP1	0.0132031	1.23073	no
CLDND1	0.0132092	-1.23064	no
LPP	0.0132179	1.23053	no
SP110	0.0132199	1.2305	no
C3ORF19	0.0132254	1.23043	no
BMP8B	0.013231	1.23035	no
FAM26F	0.0132449	-1.23017	no
CD70	0.0132497	-1.2301	no
CHTOP	0.013252	1.23007	no
TSPAN32	0.013276	1.22975	no
LIM2	0.0132946	1.22951	no
TSC22D2	0.0133113	1.22928	no
C16ORF3	0.0133226	-1.22914	no
C13ORF35	0.0133924	1.22821	no
SLC44A2	0.0134275	1.22775	no
CCT2	0.013429	-1.22773	no
CCL28	0.0134404	1.22758	no
GREB1	0.0134434	-1.22754	no
ADAMTS17	0.0134866	1.22697	no
SPATA13	0.013507	1.22671	no
SRRM1	0.0135498	1.22615	no
MRPL43	0.0135531	-1.2261	no
TOMM5	0.0135569	-1.22605	no
NDN	0.0135943	1.22557	no
NUP160	0.0136003	1.22549	yes
NAMPT	0.0136521	1.22481	no
SNRPF	0.0136672	-1.22462	no
GRM8	0.0136729	-1.22455	no
PTDSS1	0.0136833	1.22441	no
UBAC1	0.0136876	-1.22435	no
LYPLAL1	0.0136929	-1.22429	no
NUDC	0.0137084	1.22409	no
VAC14	0.0137389	1.22369	no
DAB1	0.013742	1.22365	no
PHF21A	0.013765	1.22336	no
RHOBTB1	0.0137697	-1.2233	no
EXTL3	0.0137734	1.22325	no
LOC149134	0.0137947	1.22297	no
FNTB	0.013831	1.22251	no
TAC3	0.0138394	-1.2224	no
RAPGEF1	0.0138544	-1.22221	no
SALL2	0.013866	1.22206	no
C4ORF45	0.0138999	-1.22163	no
HSD17B7	0.0139273	1.22128	no
PBX1	0.0139396	-1.22112	yes
APPL2	0.0139533	1.22094	no
VNN3	0.0139537	1.22094	yes
DAGLA	0.0139817	1.22058	no
SPCS1	0.0139971	1.22039	no
AKR1CL1	0.0140362	-1.21989	no
KIAA1383	0.0140557	1.21965	no
MYO1A	0.014062	-1.21957	no
RNF166	0.0140781	1.21936	no
GNAT2	0.0140925	1.21918	no
RBP7	0.0140938	-1.21916	no
GAPT	0.0141118	-1.21894	no
SNIP1	0.0141295	1.21872	no
EIF4EBP2	0.0141317	-1.21869	no
ENO1	0.0141401	1.21858	no
IL17RA	0.0141714	1.21819	yes
WRAP53	0.0141716	1.21819	no
TSPYL4	0.0142147	1.21765	no
AGPAT9	0.0142395	1.21734	no
STX3	0.0142496	1.21721	yes
PCBP1	0.0142639	1.21703	no
JUNB	0.0143424	1.21605	no
C7ORF43	0.0143681	1.21573	no
RICTOR	0.0143747	1.21565	no
SRCRB4D	0.0144185	-1.21511	no
GTF3C2	0.0144299	1.21497	no
SLC7A1	0.0144413	-1.21483	no
VCL	0.0144473	1.21475	no
PDE4C	0.0144528	1.21469	no
CABYR	0.0144564	-1.21464	no
MRPL54	0.0144739	-1.21443	no
CSF2RB	0.0145152	1.21392	no
CENPV	0.0145188	-1.21387	no
PPP2R5E	0.0146009	1.21287	no
WDR33	0.0146028	-1.21284	no
BIN3	0.0146048	1.21282	yes
NFYA	0.0146261	1.21256	yes
OR1F1	0.0146273	-1.21254	no
TALDO1	0.0146419	1.21237	no
C9ORF131	0.0146503	-1.21226	no
CHRNA2	0.0146519	-1.21225	no
EDDM3A	0.0146592	-1.21216	no
AMD1	0.0146658	1.21208	no
STX17	0.0146955	1.21171	no
KLK5	0.0146985	-1.21168	no
CRKL	0.0147047	1.2116	no
OAF	0.0147329	1.21126	no
CIB2	0.0147338	-1.21125	yes
FAM108B1	0.0147393	1.21118	no
ZNF268	0.0147503	1.21105	no
ZNF18	0.0147506	1.21104	no
NEBL	0.0147678	1.21084	no
SURF6	0.0147682	1.21083	no
PYCR2	0.0147812	1.21067	no
AIM2	0.0148019	-1.21042	no
CDHR5	0.0148041	-1.2104	no
UTP11L	0.0148413	-1.20995	no
FKBP14	0.0148428	1.20993	no
RTP4	0.0148853	-1.20942	no
UBE2E1	0.0149015	-1.20922	no
RPRD1A	0.0149237	-1.20896	no
MANEA	0.0149251	1.20894	no
PAQR7	0.0149375	1.20879	no
CD3G	0.0149432	-1.20872	no
LIPJ	0.014952	-1.20862	no
MT1E	0.0149989	-1.20806	no
DPP8	0.0150144	1.20787	no
YIPF3	0.015143	1.20634	no
LYRM1	0.0151623	-1.20612	no
MICALL1	0.0152122	1.20553	no
TIMM17A	0.0152212	-1.20542	no
DAGLB	0.0152433	1.20516	no
CNKSR3	0.0153109	1.20437	no
WFS1	0.0153139	1.20433	no
RIPK1	0.015314	1.20433	no
MORN2	0.0153143	-1.20433	no
ZNF473	0.0153387	-1.20404	no
SLC45A1	0.0153428	-1.20399	no
TFAP2A	0.01539	1.20344	no
FBXO4	0.0154034	-1.20328	no
CRTAP	0.0154332	1.20294	no
C9ORF84	0.0154436	-1.20282	no
MSTO1	0.015511	1.20203	no
C19ORF80	0.0155286	-1.20183	no
CXCR5	0.0155859	-1.20117	yes
POU5F1B	0.0156	1.201	no
KBTBD11	0.0156122	1.20086	no
ADIPOR2	0.0156464	1.20047	no
NTN3	0.0156499	-1.20043	no
NAA60	0.015717	1.19966	no
NOLC1	0.0157404	1.19939	no
UTS2D	0.0157494	1.19929	no
DPH2	0.0157697	1.19905	no
TCL1B	0.0157908	-1.19881	no
RPTN	0.0157948	-1.19877	no
CGRRF1	0.0158663	-1.19795	no
ILF2	0.0158779	-1.19782	no
CMTM2	0.015879	-1.19781	no
C19ORF21	0.0158879	-1.19771	no
ENTPD2	0.0158881	1.19771	no
GEMIN2	0.0159383	-1.19714	no
PIP5K1C	0.0159414	1.1971	no
RAD21	0.0159415	1.1971	no
PRPF18	0.0159602	-1.19689	no
POLR3H	0.0159871	1.19659	no
GNA15	0.0159892	1.19656	no
SLC22A10	0.0160043	1.19639	no
PTGS2	0.0160532	1.19584	yes
DPP9	0.0160593	1.19577	no
DLGAP2	0.0160687	1.19567	no
EXOSC6	0.0161053	1.19526	no
AP2S1	0.0161221	-1.19507	no
FAM81B	0.0161235	-1.19505	no
SHISA5	0.0161236	1.19505	no
TEX12	0.0161306	-1.19497	no
C18ORF25	0.0161456	1.1948	no
PHF12	0.0161941	1.19426	yes
GABRP	0.0162187	-1.19399	no
INHBB	0.016222	1.19395	no
DDX54	0.0162622	1.1935	no
SCD	0.016335	1.19269	no
RUNX3	0.0163378	1.19266	no
CNOT3	0.0163489	1.19254	no
PELI1	0.0163708	1.1923	no
GPR65	0.0163763	-1.19224	no
KIAA1143	0.0164103	-1.19186	no
TIMM8B	0.0164396	-1.19154	no
ADAM7	0.0164444	-1.19149	no
SEMA6C	0.0164499	-1.19142	no
GPR125	0.016464	1.19127	no
SEC61A1	0.0164882	1.191	no
CD48	0.0165062	-1.19081	no
ABCB9	0.0165365	1.19047	no
PPOX	0.0166556	-1.18917	no
LMF2	0.0166673	1.18905	no
C1QTNF9B	0.0167063	-1.18862	no
RTP2	0.0167389	-1.18827	no
TIMM22	0.0167424	1.18823	no
RSU1	0.0167595	1.18804	no
HAVCR2	0.0167661	1.18797	yes
[truncated: 14,781 more rows]

## Sheet: LDL-C metabolites
Metabolite	p-value	beta	Metabolite in BMTI?
cholesterol	3.60876e-95	24.0463	no
X-10419	9.56865e-54	19.0775	no
X-10500	4.87584e-44	17.4625	no
X-11809	1.19984e-32	-15.1949	no
X-10510	5.00414e-25	13.3537	no
acetylphosphate	1.55347e-21	12.3857	no
phosphate	2.11817e-21	12.3464	no
glycerol3phosphateG3P	4.37073e-21	12.254	no
glycerophosphorylcholineGPC	6.05721e-19	11.5999	yes
X-08402	8.24568e-19	11.6049	no
oleoylcarnitine	7.2311e-16	-10.5661	yes
alphatocopherol	9.06322e-16	10.5572	no
X-03094	7.11525e-12	9.04516	yes
@1stearoylglycerol1monostearin	9.5109e-12	10.0388	no
linoleamide182n6	1.58863e-10	-8.45788	no
@1stearoylglycerophosphoinositol	3.55215e-10	8.3458	no
@2tetradecenoylcarnitine	1.56484e-09	-8.08844	yes
bilirubinEE	4.68909e-09	-7.76344	yes
oleamide	6.55852e-09	-7.69099	no
@1palmitoylglycerol1monopalmitin	4.68728e-08	7.72574	yes
palmitoylcarnitine	7.4666e-08	-7.10808	yes
@1arachidonoylglycerophosphoinositol	9.32211e-08	7.09931	no
X-06350	1.94273e-07	8.19695	no
X-13496	1.97234e-07	7.07172	no
X-08766	4.64805e-07	8.49467	yes
asparagine	5.9101e-07	-6.65871	no
X-06227	1.00849e-06	6.73344	no
X-12850	1.20917e-06	-7.69912	no
X-13183	2.94974e-06	-6.2369	no
inositol1phosphateI1P	3.11251e-06	7.02165	yes
@1palmitoylglycerophosphoinositol	3.91415e-06	6.64966	no
decanoylcarnitine	4.54844e-06	-6.10443	no
isovalerate	1.03774e-05	5.86045	no
laurylcarnitine	2.86239e-05	-5.70316	yes
glycerol2phosphate	3.51385e-05	6.8105	no
@1palmitoylglycerophosphoethanolamine	5.7627e-05	5.39855	no
phenolsulfate	6.73459e-05	-5.31628	no
X-11552	7.48975e-05	-5.63779	no
X-12038	0.000119811	5.14961	yes
@1palmitoleoylglycerophosphocholine	0.000144455	-5.072	no
creatine	0.000151395	5.05662	no
X-11820	0.00021325	-4.96457	no
arabitol	0.000303708	-4.82307	no
kynurenine	0.000320179	-4.80493	yes
homostachydrine	0.000478832	-4.90356	no
taurolithocholate3sulfate	0.000527864	-4.9736	no
X-13435	0.000563318	-4.79268	no
@2palmitoylglycerophosphocholine	0.000638799	-4.56154	yes
glutaroylcarnitine	0.00068803	-4.57642	no
X-12441	0.00071518	4.55614	no
stearoylcarnitine	0.000735285	-4.60611	no
X-12786	0.000768633	-4.98098	no
@1heptadecanoylglycerophosphocholine	0.000870671	-4.51477	no
@1oleoylglycerol1monoolein	0.000920922	-4.50073	yes
X-11317	0.000989105	4.40119	no
eicosapentaenoateEPA205n3	0.00104531	4.38055	no
X-05907	0.0011739	4.36033	no
glycocholate	0.0011834	-5.37224	no
erythritol	0.00135273	-4.289	no
X-11497	0.00141623	4.26551	yes
acetylcarnitine	0.00150388	-4.24243	yes
uridine	0.00153623	4.23423	no
@1myristoylglycerophosphocholine	0.00157808	-4.22384	yes
X-11421	0.00172339	-4.18966	no
pyroglutamine	0.001726	-4.18907	no
piperine	0.00198917	-4.1639	yes
dihomolinolenate203n3orn6	0.00204768	4.12202	no
@1palmitoylglycerophosphocholine	0.0020789	-4.11603	yes
palmitoleate161n7	0.00257105	-4.03119	yes
@1oleoylglycerophosphocholine	0.00268918	-4.01306	no
gammaglutamylglutamine	0.00286273	3.98769	no
X-12100	0.00316279	-3.96701	no
@2oleoylglycerophosphocholine	0.00355023	-3.90674	no
heme	0.00373421	-3.9486	no
X-11441	0.00390408	4.05951	no
indolepropionate	0.00451619	-3.79831	no
X-14626	0.00451928	-4.55095	no
xanthine	0.00489446	-3.76405	no
arachidonate204n6	0.00492192	3.76166	no
X-04494	0.00541602	-4.33909	no
@2hydroxypalmitate	0.00559053	3.70682	no
X-14205	0.00569118	4.03912	no
oleate181n9	0.00573104	-3.69605	yes
X-06267	0.00578242	3.79792	yes
X-14662	0.00652029	-4.70921	no
X-14478	0.00675816	3.62385	no
X-12056	0.0072645	-4.32146	no
eicosenoate201n9or11	0.00776344	-3.56216	yes
pyridoxate	0.0081566	-3.56194	no
@1arachidonoylglycerophosphocholine	0.00845	-3.64198	no
X-11529	0.00867018	-4.27672	no
pseudouridine	0.00907217	-3.49176	yes
X-03056	0.00950019	-3.4707	yes
X-11799	0.00974447	-3.65369	no
homocitrulline	0.00986953	-3.6353	no
Nacetylornithine	0.0110563	-3.40243	no
X-13429	0.0111274	-4.06012	no
thromboxaneB2	0.0112534	3.44116	no
X-06226	0.0119026	3.37849	no
succinylcarnitine	0.0122266	-3.39142	no
X-12510	0.0122579	-3.38698	no
alphaketoglutarate	0.013019	-4.02095	no
X-06126	0.0132642	-3.32106	no
@10heptadecenoate171n7	0.0133755	-3.31096	yes
X-12844	0.0137866	3.3233	no
lysine	0.0148543	3.26072	no
X-04499	0.0157782	-3.43216	no
threonate	0.0163437	3.21437	no
Nacetylalanine	0.0164744	-3.22024	no
malate	0.016815	-3.38192	no
cortisone	0.0173325	3.22506	yes
glycochenodeoxycholate	0.0175542	-3.33883	no
X-13431	0.0177317	-3.35724	no
X-11795	0.0179245	-3.16907	no
X-11422	0.0180772	-3.16488	no
@7methylguanine	0.0180947	-3.18132	no
carnitine	0.0185964	3.15087	no
X-12855	0.0191463	-4.17129	no
X-14658	0.0201015	-4.2371	no
@10nonadecenoate191n9	0.0204681	-3.10303	yes
@2hydroxystearate	0.0221457	3.06989	no
caffeine	0.0234198	-3.10434	yes
X-09706	0.0235173	-3.04072	no
fructose	0.0237353	3.02797	no
@1linoleoylglycerophosphoethanolamine	0.024999	3.00133	no
docosahexaenoateDHA226n3	0.0254024	2.99307	no
X-11412	0.0256973	3.35071	no
X-11442	0.0271796	3.088	no
@5oxoproline	0.0302516	2.90172	no
linoleate182n6	0.0320327	-2.87132	yes
Cglycosyltryptophan	0.0340786	-2.83813	yes
@4acetamidobutanoate	0.0343036	-2.88285	yes
hexadecanedioate	0.0344423	-3.66065	no
X-09789	0.0345342	-2.83495	no
hexanoylcarnitine	0.0352213	-2.82033	yes
taurochenodeoxycholate	0.036994	-3.74079	no
X-11593	0.0369982	-2.79359	no
cysteineglutathionedisulfide	0.0377936	2.85788	yes
X-11444	0.0380899	2.8105	yes
X-01911	0.0381038	-2.84643	no
@17dimethylurate	0.0387539	-3.6355	no
leucine	0.0389494	2.76547	yes
X-11204	0.0395255	-2.75739	yes
@1stearoylglycerophosphoethanolamine	0.0402758	2.97592	no
X-11530	0.0406795	2.76765	no
X-02269	0.0430396	2.77237	no
X-12680	0.0433239	-3.12265	no
X-12524	0.0455228	-2.67875	no
@2hydroxybutyrateAHB	0.0457682	2.67572	yes
valine	0.0458664	2.67452	yes
X-06351	0.0463802	-3.66001	no
X-11538	0.0482151	-2.64633	yes
X-11445	0.0500057	-2.70326	no
X-11818	0.0543887	-2.63737	no
palmitate160	0.0544228	-2.57677	yes
dehydroisoandrosteronesulfateDHEAS	0.0545812	2.57509	no
threonine	0.0562489	-2.58621	no
dihomolinoleate202n6	0.0565166	-2.55482	yes
adrenate224n6	0.0595219	-2.52447	yes
urea	0.0603211	-2.51662	no
butyrylcarnitine	0.0608897	-2.51108	no
nButylOleate	0.0609286	2.86967	no
X-11793	0.0632735	-2.49532	yes
@2linoleoylglycerophosphocholine	0.0642721	-2.52662	no
bilirubinEZorZE	0.0649032	-2.66732	no
@3dehydrocarnitine	0.0691991	-2.43466	no
@1stearoylglycerophosphocholine	0.0692662	-2.43407	yes
@1linoleoylglycerol1monolinolein	0.0692952	2.43822	yes
myristate140	0.0698863	-2.42868	yes
@3methoxytyrosine	0.0730025	-2.48973	no
N2N2dimethylguanosine	0.0744553	-3.16777	no
X-11805	0.0765023	2.37347	no
citrate	0.0774709	-2.36799	yes
X-12405	0.0778499	-2.43936	no
X-12236	0.0783546	-3.26311	no
X-12465	0.0846071	-2.58163	yes
levulinate4oxovalerate	0.0856695	2.89914	no
X-10675	0.0867452	2.67763	no
X-11540	0.0879849	-2.28095	yes
phenylacetylglutamine	0.0901124	-2.27112	no
indolelactate	0.0929361	-2.42669	no
threitol	0.0932368	-2.32859	no
X-09026	0.0935648	2.25009	no
betaine	0.0942362	-2.24258	no
X-04495	0.0967958	-2.29514	no
X-08988	0.0983936	2.2148	no
X-11261	0.0988849	-2.22747	no
linolenatealphaorgamma183n3or6	0.101587	-2.19408	yes
trans4hydroxyproline	0.103749	-2.18036	no
X-11469	0.104152	2.19538	no
X-13549	0.106316	2.16739	no
@2methylbutyroylcarnitine	0.109687	-2.16959	yes
X-10429	0.109855	2.46247	no
X-14208	0.115871	2.21381	no
androsteronesulfate	0.116999	2.1059	yes
X-12990	0.11768	2.24634	no
erythronate	0.117902	-2.10815	no
X-06246	0.124501	2.10315	no
gammatocopherol	0.124801	2.72389	no
leucylleucine	0.12508	-2.56636	no
aspartylphenylalanine	0.12608	2.05831	no
X-11437	0.127767	-2.37199	no
pipecolate	0.129291	-2.03313	no
octanoylcarnitine	0.12952	-2.03192	no
X-11423	0.13113	-2.02508	no
X-11546	0.132042	-2.42248	no
gammaglutamylmethionine	0.132311	2.22654	no
X-11374	0.134414	2.05793	no
X-11787	0.137301	-1.99167	no
X-12206	0.148945	-1.9458	no
isobutyrylcarnitine	0.149413	-1.93237	no
X-03088	0.150106	1.96279	no
X-13069	0.154539	-2.0342	yes
heptanoate70	0.163231	1.86902	no
pyruvate	0.163283	-1.88655	no
X-14588	0.163796	1.86652	no
@1linoleoylglycerophosphocholine	0.164428	-1.86244	yes
hyodeoxycholate	0.166022	-2.10356	no
methionine	0.167206	-1.85156	yes
pentadecanoate150	0.169883	1.87157	no
glycine	0.171926	1.83121	yes
pelargonate90	0.172726	1.82781	no
gammaglutamylphenylalanine	0.174972	-1.82108	yes
@3hydroxybutyrateBHBA	0.175079	-1.81785	yes
X-12776	0.176198	-1.81316	no
caproate60	0.176569	1.8116	no
bilirubinZZ	0.177981	-1.82922	no
glucose	0.182159	-1.7885	yes
pantothenate	0.182773	-1.80987	no
@3methylxanthine	0.187438	-2.21189	no
X-12093	0.19159	2.26414	no
X-10810	0.195881	-1.88362	yes
X-12749	0.197858	-1.79641	no
X-12216	0.201933	-2.01949	no
isovalerylcarnitine	0.202357	1.70913	no
glutamine	0.207361	1.69037	no
docosapentaenoaten3DPA225n3	0.208789	1.68508	yes
X-12063	0.217508	1.67334	yes
X-05491	0.234005	-1.76077	no
X-11786	0.239902	-1.5757	no
@3indoxylsulfate	0.240404	-1.57402	yes
myristoleate141n5	0.241165	-1.57148	yes
X-14189	0.241258	1.59263	no
X-11438	0.244381	-1.64294	no
glycylvaline	0.251079	1.90042	no
X-14450	0.25258	1.62368	no
hydroxyisovaleroylcarnitine	0.256913	1.61516	no
X-13859	0.259826	1.54157	no
X-11247	0.263052	-1.53211	no
hypoxanthine	0.263834	1.5139	yes
X-12734	0.264844	-2.01202	no
@4methyl2oxopentanoate	0.26803	1.48511	yes
X-14625	0.269245	1.48135	no
quinate	0.269323	1.6119	no
X-12231	0.271968	-1.51742	no
@5dodecenoate121n7	0.27651	-1.46883	yes
X-11334	0.27697	-1.51523	no
ADpSGEGDFXAEGGGVR	0.277149	-1.45716	yes
X-14977	0.282891	1.58879	no
margarate170	0.283794	-1.43719	yes
caprylate80	0.284162	1.43609	no
X-10395	0.285659	1.43164	no
creatinine	0.286733	1.42845	no
benzoate	0.287666	1.42259	no
X-05426	0.290151	1.55637	no
@2stearoylglycerophosphocholine	0.290824	-1.41639	no
X-14374	0.292571	-1.43693	no
X-12696	0.297981	1.42406	no
X-02973	0.298582	1.40122	no
mannitol	0.298913	-1.47968	no
X-13671	0.299262	-1.40115	no
X-06307	0.304972	1.40647	no
epiandrosteronesulfate	0.308714	1.36763	no
@3hydroxy2ethylpropionate	0.313764	1.82324	no
gammaglutamylleucine	0.323245	1.3246	yes
pcresolsulfate	0.326108	-1.31679	no
X-11550	0.329793	1.30681	no
@2linoleoylglycerophosphoethanolamine	0.330203	1.77233	no
X-12544	0.331586	1.35094	no
X-11521	0.332462	-1.41879	no
gammaglutamylthreonine	0.336781	-1.40474	no
DSGEGDFXAEGGGVR	0.338491	-1.28351	no
X-12094	0.346609	-1.27096	yes
Nacetylthreonine	0.352462	-1.36422	yes
X-11537	0.364319	-1.22033	no
mannose	0.368117	-1.20693	yes
X-11849	0.368483	-1.28274	no
X-11847	0.370773	-1.31534	no
X-11315	0.386275	-1.16188	no
@1methylxanthine	0.387307	-1.39665	no
X-13553	0.392513	-1.21064	no
X-12212	0.401149	-1.28646	no
caprate100	0.40294	1.12165	yes
histidine	0.408868	1.10759	yes
catecholsulfate	0.411843	-1.10057	no
X-13619	0.414848	-1.09352	no
X-09108	0.415614	1.15625	no
erythrose	0.417279	1.19737	no
X-12719	0.418025	-1.46659	no
X-11299	0.418118	-1.18456	no
scylloinositol	0.421923	-1.15592	no
arabinose	0.423041	-1.37885	no
X-12704	0.430176	1.33813	no
X-03003	0.430432	1.06308	no
X-11843	0.431937	1.44157	no
lactate	0.436548	1.04344	yes
bradykinindesarg9	0.44136	1.1229	no
stearate180	0.44269	-1.02953	yes
Nacetylglycine	0.445809	-1.11377	yes
@3phenylpropionatehydrocinnamate	0.45534	-1.19071	no
X-14304	0.455404	1.12614	yes
X-14056	0.458178	-0.994931	no
@7methylxanthine	0.460568	-1.11767	no
@7alphahydroxy3oxo4cholestenoate7Hoca	0.464103	0.981871	no
N1methyladenosine	0.467382	-0.974681	yes
X-11876	0.472935	-1.24604	no
serotonin5HT	0.473787	0.96778	yes
propionylcarnitine	0.478075	-0.95143	yes
X-11880	0.480871	-0.948374	no
X-13477	0.498997	0.915043	no
ADSGEGDFXAEGGGVR	0.500641	0.903269	yes
X-12717	0.504341	-1.16935	no
X-11381	0.505014	0.896723	no
proline	0.509117	-0.885479	yes
ursodeoxycholate	0.51525	-1.14286	no
myoinositol	0.515669	-0.871834	no
X-03090	0.516205	0.984313	no
alphahydroxyisovalerate	0.522696	0.857299	yes
X-12798	0.528305	-0.865992	yes
X-12556	0.529674	-0.880292	no
X-04357	0.530868	-0.846687	no
@3methyl2oxobutyrate	0.535869	0.830316	yes
@2aminobutyrate	0.550897	-0.799937	no
@4vinylphenolsulfate	0.555313	0.802333	no
@1eicosatrienoylglycerophosphocholine	0.555534	0.790647	no
@3methyl2oxovalerate	0.559905	0.781925	yes
ornithine	0.565027	-0.771745	no
@1arachidonoylglycerophosphoethanolamine	0.567209	0.767421	no
X-12230	0.569536	0.907765	no
nonadecanoate190	0.573437	0.756501	yes
cysteine	0.573447	0.754456	no
X-12039	0.577425	-0.802901	no
octadecanedioate	0.5929	-0.769472	no
X-11850	0.593102	0.846554	no
isoleucine	0.596891	0.709369	yes
X-11859	0.597526	0.725622	no
X-02249	0.600695	-0.702027	no
HWESASXX	0.603289	0.69979	yes
phenylalanine	0.603716	-0.696211	yes
urate	0.606147	-0.69154	yes
X-13372	0.61388	0.716912	no
theobromine	0.61478	-0.677049	no
@2hydroxyisobutyrate	0.615846	-0.696779	no
X-11450	0.623474	-0.659416	no
X-11470	0.623704	-0.698389	yes
X-14473	0.62452	-0.685374	no
prohydroxypro	0.626938	-0.6527	no
gammaglutamyltyrosine	0.629836	-0.651499	no
tiglylcarnitine	0.635027	0.690842	no
phenyllactatePLA	0.637442	-0.763784	no
thymolsulfate	0.63771	0.829459	no
undecanoate110	0.642448	0.623574	no
X-12095	0.643648	-0.623004	yes
@1docosahexaenoylglycerophosphocholine	0.649882	-0.608856	no
X-12442	0.652693	-0.603623	yes
X-12771	0.656158	-0.828264	no
arginine	0.662597	0.586076	no
X-13215	0.665924	0.745217	no
dimethylarginineSDMAADMA	0.666256	-0.578501	no
X-12644	0.666895	0.577323	no
gammaglutamylvaline	0.66982	-0.576207	yes
aspartate	0.673265	0.580197	no
@3carboxy4methyl5propyl2furanpropanoateCMPF	0.679296	0.556734	no
deoxycholate	0.680848	-0.602598	no
X-12217	0.687857	-0.551633	no
X-12443	0.705443	-0.655827	no
X-14057	0.709522	-0.525918	no
X-11443	0.713624	-0.49746	no
gammaglutamylisoleucine	0.715348	-0.601667	yes
X-11327	0.71784	0.484693	no
hippurate	0.721866	0.477474	yes
biliverdin	0.727676	0.587879	no
X-11452	0.743807	-0.442615	no
cystine	0.756729	-0.466461	no
X-11852	0.762234	-0.531556	no
dodecanedioate	0.763319	-0.5474	no
X-11255	0.76342	-0.422162	no
theophylline	0.768218	-0.41946	no
X-11244	0.768381	-0.395023	no
glutamate	0.775027	-0.383372	yes
X-11568	0.777549	0.460631	no
tyrosine	0.783443	0.368657	yes
@1methylurate	0.788193	-0.433206	no
X-11485	0.788322	-0.373031	no
cholate	0.788825	0.421881	no
alanine	0.789673	0.357792	yes
stearidonate184n3	0.795854	-0.348635	yes
X-12092	0.799231	-0.341946	no
@34hydroxyphenyllactate	0.802868	-0.335766	yes
tryptophan	0.814409	0.314878	yes
X-12029	0.815716	0.329839	no
X-11440	0.81694	-0.31095	no
X-04498	0.822031	-0.327513	no
stachydrine	0.838778	-0.272915	no
X-13548	0.83963	-0.271452	no
X-11491	0.839784	0.302262	no
X-14086	0.844047	0.266777	no
X-13741	0.847612	-0.283133	no
cortisol	0.849993	0.254354	yes
citrulline	0.852088	-0.249719	no
@10undecenoate111n1	0.856404	-0.24273	yes
X-12456	0.858811	-0.269942	no
X-10506	0.860226	0.236726	no
indoleacetate	0.869646	-0.221682	no
choline	0.873545	0.213493	no
X-12627	0.876059	-0.220735	no
@15anhydroglucitol15AG	0.87842	-0.20539	no
X-11319	0.885421	-0.193639	yes
X-11845	0.886226	-0.239211	no
@1oleoylglycerophosphoethanolamine	0.886833	0.193311	no
inosine	0.893738	0.180612	no
X-11792	0.895051	0.240183	no
X-12816	0.903514	0.192542	no
X-14745	0.910518	0.175189	yes
X-12428	0.910954	-0.188923	yes
laurate120	0.926295	0.124089	yes
X-14541	0.931776	0.161445	no
X-12244	0.933521	-0.111962	yes
ascorbateVitaminC	0.936837	-0.112879	no
paraxanthine	0.948408	-0.0907626	no
valerate	0.950677	0.0904165	no
glycerate	0.956986	-0.0725675	no
betahydroxyisovalerate	0.965045	0.0607661	no
@1eicosadienoylglycerophosphocholine	0.965058	0.0614456	no
X-12253	0.965636	-0.059297	no
guanosine	0.96638	-0.0584083	no
glycerol	0.970412	-0.0497543	yes
serine	0.976622	0.0393092	no
X-12830	0.989203	-0.0218982	no
@4ethylphenylsulfate	0.998151	0.00355114	no

## Sheet: LDL-C mRNAs
mRNA	p-value	beta	mRNA in BMTI?
CEBPA	0.00014698	-5.06632	no
FAM13C	0.000152837	-5.0535	no
NCALD	0.000218174	4.93531	no
LDLR	0.00029024	-4.83861	no
LPAR5	0.0003384	4.78584	no
SLC25A4	0.000394804	4.73231	no
GPR114	0.000455287	4.68232	no
ANKRD22	0.00048087	-4.66302	yes
NHLRC2	0.000563014	4.60692	no
OSCAR	0.000567193	-4.60427	yes
MANF	0.000579025	4.59688	no
SMARCAL1	0.000772193	4.49262	no
NR0B2	0.000785186	4.48652	no
IL17RA	0.000875538	-4.44645	yes
LLGL1	0.000922326	4.42718	no
AGK	0.000958789	4.41278	no
FBXO6	0.000959035	-4.41269	no
C2CD4A	0.00111857	4.35512	no
STEAP1	0.00142928	4.26199	no
FGG	0.00143314	-4.26096	no
GPR84	0.0014719	-4.25071	no
TMEM45B	0.00150546	-4.24203	no
RET	0.00156166	4.22789	no
PIH1D2	0.00160871	4.2164	no
KLRB1	0.00162524	4.21244	no
NCF1C	0.00165127	-4.20628	no
COMMD9	0.00176925	-4.17942	no
PPP1R13B	0.00181882	4.16862	no
CD79A	0.00185019	4.16192	no
GADD45B	0.00190473	-4.15052	no
ARHGEF35	0.0020273	4.12597	no
MCF2L	0.00207321	4.11712	no
LDB2	0.00212545	4.10726	no
TRIM45	0.00212623	4.10712	no
DDX54	0.00214539	4.10356	no
KLHDC4	0.00224586	4.08537	no
TRIM22	0.00232047	-4.07233	no
RNF125	0.00234206	4.06863	no
SPOCK2	0.00237404	4.06321	no
COBLL1	0.00268978	4.01297	no
SERPINB1	0.0026996	-4.01149	no
PRMT8	0.00277881	-3.99977	no
TBC1D8	0.00279948	-3.99677	no
CPS1-IT1	0.00284265	3.99055	no
SNAI1	0.00284546	-3.99015	no
CHST5	0.00292045	-3.97956	no
PARP12	0.00293939	-3.97692	no
OAS1	0.00295127	-3.97528	no
FADS1	0.00323995	-3.93705	no
PTCH1	0.00330066	3.92941	no
PCDHB3	0.00334808	3.92353	no
GBP1	0.00339709	-3.91753	yes
KIAA1524	0.00346537	3.9093	no
HOXD11	0.00349746	-3.90548	no
FAM43A	0.00352548	3.90217	no
TNFRSF13B	0.00364844	3.88794	no
OAS3	0.00365317	-3.8874	no
CXCR6	0.00381244	3.86962	no
RPL28	0.00392325	-3.85764	no
TPD52	0.00407384	3.84184	no
BIN1	0.00410185	3.83896	no
LRP2	0.00420736	3.82827	no
SHISA4	0.00437392	3.81188	no
CXCR5	0.00437885	3.8114	yes
SNORA65	0.00445025	3.80455	no
LUZP1	0.00446089	3.80354	no
PADI4	0.00446821	-3.80284	no
C16ORF7	0.00456381	-3.79386	no
SAMD3	0.00472351	3.77923	no
LY6E	0.00475329	-3.77655	no
DCAF13	0.00486331	3.76678	no
NR4A2	0.00494524	3.75964	yes
MPZL2	0.00497241	-3.75729	no
SEMA3A	0.00502641	3.75266	yes
SERPING1	0.00507046	-3.74892	yes
SGSM1	0.00513929	3.74313	no
PAK1	0.00514665	-3.74252	yes
KRT17	0.00517155	3.74044	no
HNRNPA1	0.00517612	-3.74006	no
RAE1	0.00525537	-3.73352	no
IL2RB	0.00529198	3.73053	yes
DOK3	0.00532553	-3.72781	no
TUBBP5	0.00536767	-3.72441	no
RTP3	0.00543768	-3.71881	no
RHOT1	0.00551986	-3.71233	no
TXNDC5	0.00566922	3.70076	no
CMPK2	0.00568351	-3.69967	no
XAF1	0.0057828	-3.69214	no
LHFPL2	0.00598114	-3.67746	yes
DAPK1	0.005991	-3.67674	no
SMAD7	0.00609016	3.66957	no
DNTTIP2	0.00620276	3.66156	no
AFF1	0.00634581	-3.65157	no
C10ORF2	0.00643662	3.64533	no
CLCF1	0.00648544	3.64201	no
CHD3	0.00654989	-3.63765	no
SIGMAR1	0.00660291	-3.6341	no
MED21	0.00660479	3.63398	no
AKAP12	0.00660764	-3.63379	no
PCYOX1	0.00663699	3.63183	no
TAS2R13	0.00678745	-3.62194	no
AURKC	0.00681397	-3.62022	no
C17ORF78	0.00684994	-3.61789	no
PPP1R16B	0.00697727	3.60974	no
GZMK	0.00705059	3.6051	no
AGAP2	0.00706361	3.60428	no
RUNX3	0.00706607	3.60413	no
MZB1	0.00707178	3.60377	no
LOC401463	0.00709349	-3.60241	no
AK7	0.00723991	-3.59333	no
SLC37A3	0.00724512	-3.59301	no
LAP3	0.00733041	-3.5878	no
NMB	0.00733677	3.58741	no
CDK5RAP2	0.00738025	3.58478	no
WRAP73	0.00745882	3.58006	no
USP32	0.00746073	-3.57994	no
GPBAR1	0.00746253	-3.57984	no
HLA-DOB	0.00754127	3.57515	no
ABCB1	0.00755819	3.57415	no
HSP90B1	0.00765858	3.56825	no
WDR27	0.00781506	3.55919	no
LPPR3	0.00782074	-3.55886	no
C9ORF47	0.00783411	3.5581	no
PDGFRL	0.00784148	-3.55767	no
STAT1	0.00787428	-3.5558	no
IFI27	0.00787506	-3.55576	no
UBE2T	0.00787595	3.55571	no
C20ORF24	0.00788715	-3.55507	no
CEACAM1	0.00789016	-3.5549	yes
HSF4	0.00790969	-3.55379	no
SMPDL3A	0.00793266	-3.55248	no
DDX10	0.00807067	3.54473	no
RNF165	0.00810298	3.54293	no
B9D1	0.00815006	-3.54032	no
C16ORF55	0.00819815	-3.53767	no
AUTS2	0.00821195	3.53692	yes
SCAF1	0.00823585	-3.5356	no
IGJ	0.00835481	3.52913	no
NANOS3	0.0084181	3.52572	no
SLC8A2	0.00849648	-3.52153	no
DHX8	0.00857089	3.51759	no
SCARB2	0.00860019	-3.51604	no
RAPGEF3	0.00861117	-3.51546	no
SULT1A2	0.00863814	-3.51404	no
SHMT2	0.00864638	3.51361	no
BCMO1	0.00869517	-3.51106	no
ARHGAP31	0.00870278	-3.51066	no
SVEP1	0.00875021	3.5082	no
BOLA3	0.00879295	3.50598	yes
EIF5B	0.00892459	3.49923	no
OR2A25	0.00894188	-3.49835	no
IGF2BP3	0.00899958	-3.49542	no
GPR19	0.00900956	3.49492	no
KIF27	0.00903737	-3.49352	no
CENPL	0.00905232	3.49276	no
CCNL2	0.00917705	3.48652	no
NPAS2	0.0095095	3.47026	no
LHX5	0.00951338	3.47007	no
C19ORF80	0.00954288	-3.46865	no
UHRF1BP1	0.00954835	3.46839	no
ABCF1	0.00962115	3.46491	no
GGH	0.00966882	3.46264	no
C12ORF75	0.00967832	3.46219	no
SP100	0.00968598	-3.46182	no
SOX21	0.00975229	3.45869	no
MBOAT1	0.00975314	-3.45865	no
FANCE	0.00977336	3.4577	no
NAIP	0.00977634	-3.45756	no
TEX15	0.00978337	-3.45723	no
RTP4	0.00993208	-3.45029	no
HN1	0.00993224	-3.45029	no
IRAK3	0.0100043	-3.44696	no
RAD51C	0.0100738	3.44377	no
TAC4	0.0102393	-3.43625	no
OR4K5	0.0103042	3.43333	no
VSTM4	0.0104864	-3.42522	no
SNAP25	0.010538	3.42295	no
CDH17	0.0105687	3.4216	no
GNL1	0.0106022	3.42013	no
PLEKHA8	0.0106193	-3.41939	no
MED17	0.0106263	3.41908	no
SYBU	0.0106879	3.4164	no
CYP4Z2P	0.0107072	3.41556	no
CPN1	0.010963	-3.40459	no
IFIT5	0.0110007	-3.40299	no
ZDHHC12	0.0110306	-3.40173	no
MMP9	0.011037	-3.40146	no
CCR6	0.0110494	3.40094	no
NCR3	0.0111368	3.39726	no
WDR54	0.0111738	3.39572	no
PPIH	0.0112231	3.39366	no
NAA50	0.0112658	3.39189	no
SYDE1	0.0112777	-3.3914	no
DUSP2	0.0113888	3.38682	yes
RBBP4	0.0114205	3.38552	no
ADPGK	0.0114336	-3.38498	no
RPL36AL	0.0114454	3.3845	no
MYADM	0.0116115	-3.37776	no
VPS13C	0.0116157	3.37759	no
UGT3A2	0.0116317	3.37694	no
EBF1	0.0117154	3.37358	no
RDH5	0.0117477	-3.37229	no
HAPLN4	0.0117805	-3.37098	no
THOP1	0.0118149	3.36961	no
OLA1	0.0118505	3.3682	no
GPR18	0.0121065	3.35816	no
FAM209B	0.0121097	-3.35803	no
PRKAG1	0.0121401	-3.35685	no
TRIM32	0.0122304	3.35336	no
OAS2	0.012275	-3.35164	no
MAN2A2	0.0122751	-3.35164	yes
WSB1	0.0124829	-3.34372	no
CREG1	0.0124981	-3.34314	no
OR2A5	0.012536	3.34171	no
ADAMTS1	0.0126193	3.33858	no
SLC22A18	0.0127348	3.33427	no
SCRN1	0.0128489	3.33004	no
CCND2	0.0128914	3.32848	no
SCAND3	0.0129464	3.32646	no
KIAA1147	0.0130415	3.32299	yes
IFI35	0.0130611	-3.32228	no
EXOG	0.0130847	-3.32142	no
GLDC	0.0130952	3.32104	no
FAM154A	0.0131019	-3.32079	no
GBP4	0.0131353	-3.31959	no
SAA1	0.0131359	-3.31956	no
LOC440925	0.0131946	3.31744	no
PTPRA	0.0133353	-3.3124	no
CASP1	0.0133848	-3.31063	no
PLXNB2	0.0134042	-3.30994	no
RIMS3	0.0134243	3.30923	no
C2ORF44	0.0134618	3.3079	no
CDCA8	0.0134621	3.30789	no
DUSP3	0.013497	-3.30666	no
TBC1D7	0.0135295	-3.30551	no
OR2L13	0.0136103	-3.30267	no
KHDRBS2	0.0136432	-3.30152	no
ATG7	0.0137986	-3.29611	yes
HCRTR2	0.0140019	-3.28911	no
PCDHAC1	0.0140224	-3.28841	no
CCDC102A	0.0140413	3.28776	no
RNGTT	0.0140856	3.28626	no
USP43	0.0141002	-3.28576	no
VAMP2	0.0142313	-3.28132	no
UPB1	0.0142555	-3.28051	no
CD300E	0.0142686	-3.28007	no
TMEM99	0.0144442	3.27419	no
FAM172A	0.0144774	3.27309	no
DNAJC9	0.0145283	3.2714	no
SHF	0.0145782	-3.26975	no
SFMBT2	0.0146525	3.2673	no
DYRK2	0.014687	3.26617	no
TRAPPC5	0.0146949	-3.26591	no
KIAA0125	0.0147416	3.26439	no
C3ORF17	0.0147891	-3.26283	no
HENMT1	0.0148526	3.26077	no
CDIPT	0.0148841	-3.25975	no
MCHR1	0.0148874	3.25964	no
SGCE	0.0149665	3.25708	no
CAMK2N1	0.0150128	3.25559	no
CTSW	0.0150679	3.25383	no
RNF138P1	0.0151053	3.25263	no
FCRLA	0.0151361	3.25164	no
BTLA	0.0151686	3.2506	yes
P2RX7	0.0151868	-3.25003	yes
SOCS5	0.0152607	3.24768	no
FMNL3	0.0153192	3.24583	no
KCNK18	0.0154398	3.24203	no
PHKG2	0.0154812	-3.24073	no
NUCKS1	0.0155085	3.23988	no
NLRP6	0.0155109	-3.2398	no
FAM198B	0.0156298	-3.2361	yes
SMAP1	0.015673	3.23476	no
REP15	0.0157506	-3.23236	no
GSTA5	0.0158131	-3.23044	no
MEF2D	0.0158158	3.23036	no
CCDC158	0.0158252	3.23007	no
CHST10	0.0158862	3.2282	no
IFI44	0.0159155	-3.2273	no
FLVCR2	0.0159276	-3.22693	no
ZNF135	0.0159851	3.22518	no
INTS5	0.0159891	3.22506	no
IFIH1	0.0160118	-3.22437	no
PLSCR1	0.0160657	-3.22273	no
ZNF438	0.0160708	-3.22258	no
LEFTY2	0.0160752	3.22245	no
ALKBH5	0.0162066	3.21848	no
PKHD1L1	0.016273	3.21648	no
COLQ	0.0163876	3.21306	no
ANK2	0.0164791	3.21035	no
DRAM1	0.0165238	-3.20902	no
BRI3	0.0165482	-3.2083	no
KLRG1	0.016613	3.20639	no
PDCL	0.016657	3.2051	no
TRIM50	0.0167041	3.20372	no
DLK1	0.0167798	-3.2015	no
HOXB7	0.0169327	3.19706	no
TYMP	0.0169673	-3.19606	no
VGLL4	0.0169779	3.19575	no
TOX2	0.0171036	3.19214	no
MBD3L1	0.0171326	3.19131	no
VNN1	0.0173869	-3.18407	no
ALAD	0.0173887	-3.18402	no
HSP90AB2P	0.0174827	3.18137	no
WDR26	0.0175332	-3.17995	no
STK39	0.017551	3.17945	no
ABHD1	0.0175691	3.17894	no
PI4K2B	0.0175877	3.17842	no
WBP2NL	0.0175878	-3.17842	no
LRP3	0.0176351	-3.1771	no
USP1	0.0177712	3.17331	no
NBEAL2	0.0180271	-3.16625	no
ACOT6	0.0180813	-3.16477	no
LTBR	0.0180931	-3.16445	yes
HIATL1	0.0181185	-3.16375	no
PLS1	0.0182506	3.16016	no
MACC1	0.0183051	-3.15869	no
LGALS9B	0.0184157	-3.15571	no
PARP10	0.0184789	-3.15401	no
RBP5	0.0185074	3.15325	no
IFNGR2	0.018624	-3.15013	no
MAPK11	0.0187237	3.14749	no
LOXL3	0.0187559	-3.14663	no
THY1	0.0187765	-3.14609	no
IL21R	0.0188757	-3.14347	no
SLC16A3	0.0188758	-3.14347	no
FAM83G	0.0188789	3.14339	no
CBLB	0.0189361	3.14189	yes
KEAP1	0.0190187	-3.13972	no
C9ORF91	0.0190269	-3.13951	no
C7ORF34	0.0190758	-3.13823	no
NLRP7	0.0191122	3.13728	no
VPREB1	0.0191396	3.13657	no
PARP9	0.0191811	-3.13549	yes
SLC6A18	0.0192547	3.13358	no
TARSL2	0.0193167	3.13198	no
FUT7	0.0193248	-3.13177	no
TRIM6	0.0193511	-3.1311	no
SAE1	0.0193669	3.13069	no
CD300A	0.0195667	-3.12557	yes
UGT2A1	0.0195837	-3.12514	no
MYH7B	0.0195912	3.12495	no
NSUN7	0.019636	-3.12381	no
PLEKHF1	0.0196421	3.12365	no
CTBS	0.0196807	-3.12267	no
NLRP4	0.0197874	3.11997	no
ZNF827	0.0198182	3.11919	no
G3BP1	0.0199821	3.11507	no
SCARA5	0.0200036	3.11454	no
RBCK1	0.0200058	-3.11448	no
HIST3H3	0.0200121	-3.11432	no
RNF17	0.020067	-3.11295	no
C12ORF59	0.020074	-3.11278	no
OR1G1	0.0201163	3.11172	no
LCN15	0.020144	-3.11103	no
OR3A2	0.0201762	-3.11023	no
C1RL	0.0202482	-3.10845	yes
CACNB2	0.0202768	3.10774	no
SLC30A5	0.0203476	3.10599	no
LAX1	0.0203536	3.10585	no
SUDS3	0.0204118	-3.10441	no
LIN28B	0.0204926	-3.10243	no
SDAD1	0.0206602	3.09834	no
SOX13	0.0207959	3.09505	no
STAT4	0.0208967	3.09261	yes
CAP2	0.0210558	3.0888	no
C2ORF71	0.0210658	-3.08856	no
APAF1	0.0211336	-3.08694	no
KLF11	0.0212007	3.08534	no
LAMA4	0.0212032	-3.08528	no
TUBGCP3	0.0212351	3.08452	no
ALX4	0.0212464	-3.08425	no
RNMT	0.021252	3.08412	no
GABARAP	0.0212995	-3.08299	no
ATP11B	0.021327	-3.08234	no
ZFP41	0.0213703	-3.08132	no
CD33	0.0214064	-3.08047	no
GGA2	0.021446	3.07953	no
CRIP3	0.0214513	-3.07941	no
C9ORF66	0.0216196	-3.07546	no
VPREB3	0.0216283	3.07526	no
RNF135	0.0217068	-3.07343	yes
ABCD3	0.0217809	-3.0717	no
EED	0.0218039	3.07117	no
IFI44L	0.0218042	-3.07116	yes
SLC6A13	0.0218568	-3.06994	no
LGR5	0.0219164	-3.06856	no
MPRIP	0.0219486	3.06782	no
FAM111A	0.0221254	-3.06375	no
SEMA4F	0.0221772	3.06257	no
PLA2G7	0.0221792	-3.06252	no
SETMAR	0.0222203	3.06158	no
C1QC	0.0222418	-3.06109	no
DNAJB12	0.0222797	-3.06023	no
ANXA6	0.0223061	3.05963	no
ST3GAL6	0.0224244	-3.05694	no
CITED4	0.0225096	-3.05501	no
GOT2	0.022515	3.05489	no
ZNF181	0.0225533	3.05403	no
SAMD9L	0.0225865	-3.05328	yes
LEUTX	0.0225959	-3.05307	no
LOC115110	0.0226349	-3.05219	no
TAP2	0.0226844	-3.05108	no
INCENP	0.0228362	3.04769	no
VIP	0.0230343	3.04328	no
POLR2L	0.0230733	3.04242	no
CCDC153	0.0230995	-3.04184	no
ARL4C	0.0231554	3.04061	no
NOP14	0.0232487	3.03856	no
FCAR	0.0232488	-3.03856	yes
PRKAB1	0.023277	-3.03794	no
FKBP11	0.0233224	3.03694	no
SLC26A8	0.0233767	-3.03575	no
ACTR8	0.023575	3.03144	no
S1PR5	0.0235862	3.0312	yes
NDRG4	0.0237347	-3.02798	no
SCO2	0.023746	-3.02774	no
UBQLN4	0.0237609	3.02742	no
CCDC9	0.0238782	-3.0249	no
CCDC91	0.0239449	3.02347	no
TNFRSF17	0.0240115	3.02204	no
CCNB1IP1	0.0240258	3.02174	no
SAG	0.0240866	3.02044	no
HSD17B11	0.0241116	-3.01991	no
GRIN1	0.0241447	-3.01921	no
TP53INP1	0.024266	-3.01664	yes
MARC1	0.0242693	-3.01657	no
TYR	0.0243263	-3.01536	no
MMP23B	0.0243443	3.01498	no
AGA	0.0243556	3.01474	no
PPP3R1	0.0244771	3.01219	no
CD7	0.0245365	3.01094	yes
RASAL2	0.0245583	3.01049	no
UBE2L6	0.0245786	-3.01006	no
STAT2	0.0246156	-3.00929	yes
MEI1	0.0246181	3.00923	no
ZFP82	0.0246267	3.00905	no
HSF5	0.024657	3.00842	no
KCNJ8	0.0246931	3.00767	no
ADAM20	0.0248267	-3.00489	no
NUP62	0.0248611	-3.00418	no
EPSTI1	0.0249845	-3.00163	yes
CD44	0.0250476	-3.00033	no
STRN	0.0251046	-2.99916	no
CD19	0.0252341	2.9965	no
BANK1	0.0252371	2.99644	no
C11ORF70	0.0252417	2.99635	no
CCNA1	0.0253028	-2.9951	yes
DRD1	0.0253074	-2.995	no
ATXN7L1	0.0253298	2.99455	no
OR2B2	0.0253516	2.9941	no
MATN2	0.025418	-2.99275	no
C12ORF61	0.0254704	-2.99169	no
GPR182	0.0255278	-2.99052	no
SAMD7	0.0255505	-2.99006	no
CD6	0.0255574	2.98993	no
FIGN	0.0256044	2.98898	no
PLCXD1	0.0256207	-2.98865	no
KCNF1	0.0257217	-2.98661	no
PPP1R3C	0.0258464	2.98411	no
TBC1D29	0.0259833	2.98137	no
IGSF9	0.0260721	2.9796	no
SERPINA6	0.0261362	-2.97833	no
CACNA1E	0.0262238	-2.97659	no
TMCC2	0.0263225	-2.97464	yes
PDHB	0.0263514	2.97408	no
CTXN3	0.0263808	-2.9735	no
ARPC2	0.0265222	-2.97072	no
SPINT4	0.0266183	-2.96884	no
VTI1B	0.0266639	-2.96795	no
SIGLEC16	0.0267172	-2.96691	no
MTUS2	0.02693	2.96278	no
ITPR3	0.0269772	2.96187	no
HSPBAP1	0.0270591	-2.96029	no
RBM48	0.0271832	2.95791	no
ARHGEF38	0.0271895	-2.95778	no
SEC11C	0.0272058	2.95747	no
OCIAD2	0.027237	2.95687	no
ITM2C	0.0272801	2.95605	yes
OR1K1	0.0272968	-2.95573	no
PRPF38A	0.027376	2.95422	no
THBS1	0.027417	-2.95344	no
SCPEP1	0.0275232	-2.95142	no
TNFRSF13C	0.0275335	2.95122	no
HSD17B3	0.0275363	2.95117	no
ANKRD17	0.0275924	2.95011	no
ZNF542	0.0276388	-2.94923	no
PARVG	0.0276408	-2.94919	no
CD247	0.0277019	2.94804	no
TNFSF13B	0.0277663	-2.94682	yes
PHF15	0.0277789	2.94659	no
FLJ33360	0.0277857	2.94646	no
IL1RN	0.0277925	-2.94633	no
DMRTA1	0.0279161	-2.94401	no
UBE2S	0.0280575	-2.94136	no
CENPF	0.0281641	2.93938	no
PTK2B	0.0281982	-2.93874	no
SLC25A3	0.028239	2.93799	no
ZNF883	0.0282816	-2.9372	no
NAT10	0.0283105	2.93666	no
NF2	0.0283119	2.93664	no
UBE2V2	0.0283391	2.93613	no
OR2D2	0.0284952	-2.93325	no
PTGER3	0.0285404	-2.93242	no
SNX20	0.0285855	-2.93159	no
C11ORF41	0.0286532	2.93035	no
CCDC121	0.0287232	2.92906	no
ITGB7	0.0289182	2.92551	no
RUNDC3B	0.0289266	2.92535	no
KCNT1	0.0289353	2.9252	no
R3HDML	0.0290139	-2.92377	no
MAPK1IP1L	0.0291432	2.92143	no
MEGF9	0.0292856	-2.91886	no
TARP	0.0293477	2.91774	no
DIRC3	0.0295273	2.91453	no
ZNF708	0.0296221	2.91284	no
APBA2	0.0296312	2.91267	no
OR2T12	0.0296816	-2.91178	no
C2ORF68	0.0297221	-2.91106	no
CNOT1	0.0298092	2.90951	no
KIAA1549	0.0298104	-2.90949	no
GPR56	0.0298117	2.90947	yes
HK3	0.0298224	-2.90928	no
DUSP18	0.0298233	-2.90926	yes
ARNTL2	0.0298516	-2.90876	no
BSDC1	0.0298898	-2.90809	no
FBXO31	0.0299025	2.90786	no
PCDH10	0.0299663	-2.90674	no
MAP3K2	0.0300698	-2.90491	no
CELF2	0.0302617	-2.90155	yes
IFITM3	0.0303042	-2.9008	no
PAX6	0.0304005	-2.89912	no
ITIH5	0.0304187	-2.89881	no
MLF1	0.0305855	2.89591	no
SSSCA1	0.0307658	2.89279	no
RORA	0.030785	2.89246	no
TOX	0.0308847	2.89075	no
ALDH18A1	0.0309466	2.88968	no
BRD2	0.030954	2.88956	no
C19ORF44	0.0309982	2.8888	no
C3ORF37	0.0311025	2.88701	no
DNAJC16	0.0312698	-2.88416	no
NUTF2	0.031451	-2.88109	no
TSEN2	0.0314801	2.88059	no
PLA2G3	0.031546	2.87948	no
PVRL1	0.0316768	2.87728	no
GEMIN5	0.0316917	2.87703	no
CD68	0.0317339	-2.87632	no
R3HDM1	0.0317568	2.87593	no
MUM1	0.0317624	2.87584	no
MS4A14	0.0318838	-2.8738	no
COLEC10	0.0320825	-2.87049	no
OR2AK2	0.0321712	-2.86902	no
BRAF	0.032191	-2.86869	no
MATK	0.0322528	2.86766	no
ZKSCAN3	0.0322677	-2.86742	no
SNORD46	0.0322961	2.86695	yes
CD96	0.0323758	2.86563	no
TJP3	0.0323788	2.86558	no
KYNU	0.0324131	-2.86501	yes
IARS	0.0324753	2.86399	no
KCNMB1	0.0324864	-2.8638	no
KRTAP10-1	0.0325408	-2.86291	no
SMURF2	0.0325498	-2.86276	no
NSUN6	0.0325509	2.86274	no
POLD4	0.0325629	-2.86255	no
TSHZ3	0.0325727	-2.86239	no
ALDOC	0.032635	2.86136	no
CDKL3	0.0326461	2.86118	no
SLC36A2	0.0327004	-2.86029	no
CDR2	0.032724	2.85991	no
IFI6	0.0327673	-2.8592	no
RBFOX3	0.0328506	-2.85784	no
TTC36	0.0329768	-2.85578	no
HOXC9	0.0329818	-2.8557	no
C22ORF29	0.0330113	2.85522	no
ZNF792	0.0330426	2.85472	no
SLC9A8	0.0331168	-2.85351	no
NEK2	0.0331442	2.85307	no
SCGB2A1	0.0331658	2.85272	no
PELI3	0.03318	-2.85249	no
GH1	0.0332305	-2.85168	no
C11ORF93	0.0332516	2.85134	no
VWA7	0.0333557	-2.84966	no
SLC25A42	0.0334144	2.84871	no
GNAI1	0.0334745	-2.84775	no
NTNG2	0.0335012	-2.84732	no
SNORA25	0.0335788	-2.84608	no
RRAS2	0.0336413	2.84508	no
PGAM2	0.0336518	-2.84491	no
PVRIG	0.0336739	2.84456	no
KIR3DL3	0.0336743	2.84455	no
C16ORF78	0.0337526	-2.8433	no
MFSD2A	0.0338064	-2.84245	no
GALNT4	0.0339333	-2.84043	no
KIAA1279	0.0340436	2.83868	no
PSG11	0.0340802	-2.8381	no
KIFC1	0.0341646	2.83677	no
UST	0.0341824	2.83649	no
NPY1R	0.034184	-2.83647	no
RNF41	0.034192	-2.83634	no
KIF14	0.0342018	-2.83619	no
NPC1	0.0342404	2.83558	no
DYNLRB1	0.0343778	-2.83342	no
ALKBH7	0.0345475	-2.83076	no
NELL1	0.0346481	-2.82919	no
CELSR2	0.034664	2.82895	no
DDX58	0.0346827	-2.82865	no
RHOBTB1	0.0346876	-2.82858	no
SIRT7	0.0347014	-2.82836	no
UNC45A	0.0347264	2.82798	no
DNASE1L3	0.034734	2.82786	no
TMEM104	0.0347543	2.82754	no
RNF2	0.0347969	2.82688	no
NT5DC3	0.0350424	-2.82308	no
C5ORF28	0.0350645	2.82274	no
AGPAT2	0.0350966	-2.82224	no
TRIM21	0.0351267	-2.82178	no
TNN	0.0352224	-2.82031	no
PLLP	0.0352405	-2.82003	no
PYHIN1	0.0352586	2.81975	no
NAAA	0.0352595	-2.81974	no
SLC2A10	0.0352652	2.81965	no
C12ORF23	0.0353392	2.81852	no
MAD2L1BP	0.0354159	-2.81734	no
CR2	0.0355712	2.81497	no
MYD88	0.0355776	-2.81487	no
RBP7	0.0357776	-2.81184	no
CD79B	0.0358071	2.81139	no
TMEM154	0.0358334	-2.81099	no
SST	0.0359198	2.80968	no
PPP2R1B	0.0359981	2.8085	no
FOXQ1	0.0360563	2.80762	no
GATA2	0.0360619	-2.80754	yes
GPR157	0.0360921	-2.80708	no
TMEM163	0.036172	2.80588	no
PFDN6	0.0361943	2.80555	no
LOC100130264	0.0362983	2.80399	no
CNOT6L	0.0363513	2.8032	no
IRF2BP2	0.0364264	-2.80207	no
ENPP4	0.0364606	2.80156	no
SNX25	0.0364936	2.80107	yes
SYT11	0.0365027	2.80094	no
SKAP1	0.0365584	2.80011	no
PHF20L1	0.036559	-2.8001	no
ITGBL1	0.0366121	-2.79931	no
OBP2A	0.0366223	-2.79916	no
FBXO11	0.0366225	-2.79915	no
MGST1	0.0366298	-2.79904	yes
KLHDC7B	0.0366311	-2.79903	no
PRF1	0.0366591	2.79861	yes
CRYGC	0.0367456	2.79733	no
DNLZ	0.0368654	2.79555	no
AFG3L1P	0.0369231	2.7947	no
RSAD2	0.0369767	-2.79391	no
ATOH8	0.0370416	-2.79295	no
PPP3R2	0.03727	2.7896	no
PTGES2	0.0374083	2.78758	no
LINC00340	0.037413	-2.78751	no
NAT9	0.037446	-2.78703	no
CKAP5	0.0374817	2.78651	no
SMARCD3	0.0374881	-2.78642	no
DNAJC8	0.0375832	2.78503	no
SMG7	0.0376401	-2.7842	no
METTL7B	0.037739	-2.78277	no
LRRC71	0.0377898	2.78203	no
SOX17	0.0378288	2.78147	no
STX3	0.0378464	-2.78122	yes
RBM22	0.0378801	2.78073	no
SEL1L3	0.0378809	2.78072	no
HAUS4	0.0379125	-2.78026	no
CLCA2	0.0379637	-2.77952	no
SEMA3G	0.0380143	2.77879	no
STRBP	0.0380265	2.77862	no
ITGAM	0.0380268	-2.77861	no
OIT3	0.0381449	2.77692	no
PRRX1	0.0383492	2.77399	no
PCSK7	0.0384018	2.77324	no
MAFA	0.0384137	-2.77307	no
KLK7	0.0384875	-2.77202	no
TMEM51	0.0384879	-2.77201	no
BNC2	0.0386223	2.7701	no
RCAN3	0.0387211	2.7687	no
WDR6	0.0387832	2.76782	no
SKAP2	0.0388057	-2.7675	no
AMPD3	0.0388652	-2.76666	no
SLC25A36	0.0389155	2.76595	no
ABR	0.038951	-2.76545	no
BPNT1	0.0389632	2.76527	no
CYP2E1	0.0390223	2.76444	no
THPO	0.0390416	2.76417	no
BAZ2B	0.0391579	-2.76253	no
ADAR	0.039191	-2.76207	no
TFEB	0.0393694	-2.75957	no
MPST	0.0393955	-2.75921	no
SIRT4	0.0394914	2.75787	no
PTPN4	0.0395994	2.75636	no
ZDHHC17	0.0396566	-2.75557	no
SUOX	0.0396762	-2.7553	no
UGT2B15	0.0397093	-2.75484	no
IGSF6	0.0397875	-2.75375	no
LIMD2	0.0397904	-2.75371	no
GATA3	0.0398023	2.75355	no
C3AR1	0.0398134	-2.7534	no
IRF2	0.0399409	-2.75163	no
GAS2L2	0.0399906	2.75095	no
FTL	0.0400743	-2.74979	no
FHDC1	0.0400893	-2.74959	no
CLPTM1L	0.0401412	2.74887	no
IDH2	0.040371	-2.74572	yes
CAMLG	0.0404084	2.74521	no
CLRN1	0.0404526	-2.7446	no
ZNF611	0.0405589	2.74315	no
IFIT3	0.04058	-2.74287	yes
KCNK13	0.0406376	-2.74208	no
ITGAX	0.0407285	-2.74085	no
IL4R	0.0408167	-2.73965	no
FKBP1A	0.0409021	-2.73849	no
ADARB2	0.0409864	2.73735	no
GNG5	0.0410212	-2.73688	no
C14ORF43	0.0410448	-2.73657	no
ADRB3	0.0411818	2.73472	no
STXBP3	0.0412046	-2.73441	no
SACS	0.0413071	2.73303	no
PLCL2	0.0413788	-2.73207	no
MORN1	0.0413871	-2.73196	no
RNF222	0.0414306	2.73138	no
KCNS1	0.041463	2.73095	no
TGFB2	0.0414989	2.73047	no
TRAPPC4	0.0415697	2.72952	no
AGPAT9	0.0416761	-2.7281	no
SLC22A25	0.0417288	-2.7274	no
MOV10	0.041808	-2.72635	no
PSMB10	0.0418533	-2.72575	no
ATP11A	0.0419935	-2.72389	no
ICAM2	0.0420914	2.72259	no
SULF2	0.0422008	-2.72115	no
OSBP	0.0422521	2.72047	no
BHLHE41	0.0422895	2.71998	no
TLR5	0.0423644	-2.719	yes
TOR1AIP1	0.0423851	-2.71873	no
ACCS	0.0424174	-2.7183	no
WAC	0.0425306	-2.71682	no
CD46	0.0425409	-2.71668	no
OR9A4	0.0426164	2.71569	no
CHTF8	0.0428096	-2.71317	no
MS4A5	0.0428348	-2.71285	no
HYI	0.0428615	-2.7125	no
SCRIB	0.0428957	-2.71205	no
APLP2	0.0429016	-2.71198	no
RORB	0.0429275	-2.71164	no
TTLL5	0.0430425	2.71015	no
C20ORF173	0.0430811	-2.70965	no
NXT1	0.0434322	2.70512	no
OR51B5	0.0434479	-2.70491	no
DTHD1	0.0434953	2.7043	no
CENPC1	0.0435443	-2.70368	no
POU2AF1	0.0435698	2.70335	no
TMEM108	0.0435915	-2.70307	no
LCOR	0.043607	-2.70287	no
PPP1R3D	0.0436075	-2.70286	no
PSME2	0.0436477	-2.70235	yes
FAM19A5	0.043674	2.70201	no
TPRG1	0.0436832	2.70189	no
PXDC1	0.0436878	-2.70184	no
WASH3P	0.0437071	-2.70159	no
IGSF21	0.0437181	2.70145	no
KCNAB3	0.0437461	2.70109	no
ACO1	0.0437676	2.70082	no
TRPC6	0.0437998	2.7004	no
KCNK12	0.0438238	2.7001	no
SPERT	0.0438532	-2.69972	no
AP3B2	0.0438574	-2.69967	no
RGS14	0.0438606	-2.69963	no
ITPR2	0.0439885	-2.698	no
ZBP1	0.0440862	-2.69676	no
RPS6KA4	0.0442322	-2.6949	no
ZNF35	0.0443162	2.69384	no
TPH1	0.044342	-2.69351	no
SPINT2	0.0443459	-2.69347	no
KBTBD11	0.0444558	-2.69208	no
C4ORF37	0.0444744	-2.69184	no
PRKACA	0.044481	-2.69176	no
ZNF571	0.0445412	2.691	no
COX6B2	0.0445552	-2.69082	no
KRT26	0.0446638	-2.68946	no
MEIS3P1	0.0448138	-2.68758	no
MIR205HG	0.0448181	2.68752	no
CARS	0.0448483	-2.68714	no
RAB11B	0.0449856	-2.68543	no
GPR22	0.0450023	-2.68522	no
EDN1	0.045013	-2.68509	no
GIMAP5	0.045248	2.68216	no
RUNX1	0.0452679	-2.68191	no
UFC1	0.0453595	2.68077	yes
IGFBP6	0.0453673	2.68068	no
FCER2	0.0454196	2.68003	no
HSPA12B	0.0456092	-2.67768	no
C4ORF21	0.0456228	2.67752	no
OR1E2	0.0456425	2.67727	no
HYAL2	0.045693	-2.67665	no
USMG5	0.0457155	-2.67637	no
OTOF	0.0457326	-2.67616	no
KIR3DL1	0.0458044	2.67528	yes
AQR	0.0458661	2.67452	no
EVI5L	0.0459228	2.67382	no
OR5M3	0.0459317	-2.67372	no
SCLT1	0.0459851	-2.67306	no
MGAT1	0.0461558	-2.67097	no
RSPO1	0.0461888	2.67057	no
INTS3	0.0462596	-2.6697	no
SQRDL	0.0462776	-2.66948	no
EOMES	0.0463696	2.66836	no
ATP1A2	0.0464696	2.66715	no
NUMB	0.0465059	-2.66671	no
UGCG	0.0465785	-2.66582	no
KIAA0182	0.046628	2.66522	no
IQSEC3	0.0466393	-2.66509	no
LOC606724	0.0466642	2.66479	no
NLRP1	0.046729	-2.664	no
PGS1	0.0467423	-2.66384	no
UQCRB	0.0467827	2.66335	yes
CISD1	0.0468345	2.66273	no
CARD11	0.0469562	2.66126	no
ITPA	0.0469703	2.66109	no
BST2	0.0470776	-2.6598	no
MAP4K4	0.0470853	-2.65971	no
ATG16L2	0.0470856	-2.6597	yes
ZC3H12A	0.0471452	-2.65898	no
SERPIND1	0.0471804	-2.65856	no
ARPC5L	0.0475472	2.65418	yes
CADM1	0.0475667	2.65394	no
PCDHGA2	0.0475814	2.65377	no
TSPO	0.047589	-2.65368	no
KIF5C	0.0476164	2.65335	no
ZYX	0.0476851	-2.65253	no
CD2	0.0477652	2.65158	no
DPP8	0.0477681	-2.65155	no
MFSD7	0.0477735	-2.65148	no
SERTAD3	0.0478354	-2.65075	no
FAH	0.0479676	-2.64918	no
ARL11	0.0479693	-2.64916	no
CERS3	0.0480617	-2.64807	no
SEPHS2	0.0480697	-2.64798	no
AGR3	0.048175	-2.64673	no
MYO1D	0.0481754	2.64673	no
NHP2L1	0.048178	2.6467	no
SCRT2	0.0482214	-2.64619	no
PISD	0.0485488	-2.64234	yes
DRG2	0.0485604	2.6422	no
PSENEN	0.0486227	-2.64148	yes
OR2AG1	0.0486561	2.64108	no
TCTEX1D2	0.048726	2.64027	no
PRKDC	0.0487844	2.63959	no
FAM83C	0.0487995	-2.63941	no
ARHGAP30	0.0488062	-2.63933	no
LOC339524	0.0488536	-2.63878	no
ILVBL	0.0488934	-2.63831	no
THEM4	0.0489749	2.63737	no
KCNJ12	0.0491249	2.63562	no
LRRC46	0.0491257	-2.63562	no
PCDHB10	0.0491695	-2.63511	no
TP73	0.0492244	-2.63447	no
S1PR4	0.0492543	-2.63412	no
NCKAP1L	0.0492923	-2.63368	no
EIF1AD	0.0493107	2.63347	no
LRRC52	0.0494312	-2.63208	no
PEG3	0.0494534	-2.63182	no
LMAN1	0.0494588	2.63176	no
DLL3	0.0495197	2.63106	no
C21ORF58	0.0495641	-2.63055	no
MGAT3	0.0498264	2.62754	no
ATOH1	0.0498673	2.62707	no
SPATA3	0.0498967	2.62673	no
TEKT1	0.0498988	-2.62671	no
PPP2R3C	0.0499797	-2.62578	no
OSBPL5	0.0500009	2.62554	no
OXSR1	0.0500362	2.62514	no
CLVS2	0.0500482	-2.625	no
OR6C6	0.0500587	-2.62488	no
TMEM18	0.050137	2.62399	no
CKAP2L	0.0501842	2.62345	no
CFDP1	0.0502138	-2.62311	no
ING4	0.0502439	-2.62277	no
FAM200B	0.0503007	-2.62212	no
C20ORF196	0.0503699	2.62133	no
SOX11	0.0503786	2.62124	no
EXT1	0.0504209	-2.62075	no
ACTL10	0.0505352	2.61946	no
HERC2P4	0.0505472	-2.61932	no
HPS6	0.0505577	2.6192	no
RASGRP4	0.0506799	-2.61782	no
VCAN	0.0507764	-2.61673	no
KBTBD2	0.0507997	-2.61647	no
NCL	0.0508249	2.61619	no
CPT1A	0.050836	2.61606	yes
RPUSD2	0.0511444	2.61259	no
IRF7	0.0512606	-2.61129	no
ZNF385A	0.0512883	-2.61098	no
EIF4E3	0.0512906	-2.61096	no
TRAPPC10	0.0514982	-2.60864	no
ZNF155	0.0515208	2.60838	no
FBXO5	0.0517071	2.60631	no
TNFRSF11B	0.0519298	-2.60384	no
CDKL2	0.0519706	-2.60339	no
HIST3H2A	0.0520326	2.6027	no
RPS14	0.0520856	2.60212	no
ATP6V1F	0.0522852	-2.59992	no
TRHR	0.0522989	-2.59977	no
HERC5	0.0523569	-2.59913	yes
SBNO1	0.0523638	-2.59905	no
GZMA	0.0525921	2.59655	no
CRTAC1	0.0526359	2.59607	no
LRRC8D	0.0527347	-2.59498	no
MMACHC	0.0527367	2.59496	no
TNFSF10	0.0527755	-2.59454	no
E2F5	0.0527963	2.59431	no
POLR3H	0.0528167	2.59409	no
VMO1	0.0528343	2.5939	no
FMO9P	0.0528912	-2.59328	no
BTN3A1	0.0529222	-2.59294	yes
UMPS	0.0529223	2.59294	no
EPRS	0.0529789	2.59232	no
ZNF670	0.0531083	2.59091	no
WDR74	0.0531906	2.59002	no
INADL	0.0532121	2.58978	no
REM2	0.0532169	-2.58973	yes
LAMP3	0.0532435	-2.58944	no
NIP7	0.0532956	2.58888	no
BHLHE40	0.0533689	2.58809	no
NBN	0.053537	-2.58627	no
IZUMO2	0.0536048	-2.58554	no
GREB1L	0.0536167	2.58541	no
PSTPIP2	0.0536429	-2.58513	no
ZIM2	0.0537035	2.58447	no
NCKAP5	0.0538278	2.58314	no
OR6S1	0.0538941	-2.58243	no
EIF2AK2	0.0538987	-2.58238	no
MOXD1	0.0539658	2.58166	no
SLC25A21	0.0539798	-2.58151	no
CPB1	0.0540613	-2.58063	no
RARRES3	0.0541501	2.57968	no
POU1F1	0.0542209	-2.57893	no
NANP	0.0543477	2.57757	no
CSMD3	0.0543512	2.57753	no
KCNQ1DN	0.0544933	2.57602	no
ZMYND11	0.0546341	2.57453	no
SOX5	0.0548392	-2.57235	no
ZFP90	0.0548622	2.57211	no
ERRFI1	0.0549346	2.57134	no
KIRREL3	0.0549962	-2.57069	no
RASD2	0.0550025	-2.57063	no
PGF	0.0550823	-2.56978	no
ADAM21	0.0551092	-2.5695	no
HSD17B12	0.0551804	-2.56875	no
ROBO3	0.0551862	2.56869	no
MILR1	0.0552593	-2.56792	no
IL28A	0.0552999	2.56749	no
TSPAN14	0.0554424	-2.566	no
OIP5	0.0555346	2.56503	no
AQP6	0.0557087	-2.56321	no
HK2	0.0557234	-2.56306	no
MPPED1	0.0557253	-2.56304	no
DTYMK	0.0557553	2.56272	no
TOR1B	0.0558222	-2.56203	no
DNAL4	0.0558779	2.56145	no
EXOC2	0.0559135	2.56108	no
ECHDC1	0.0559217	2.56099	no
MAGOHB	0.0559402	-2.5608	no
CDA	0.0561355	-2.55877	no
USP15	0.0563063	-2.557	no
NXNL2	0.0563089	-2.55697	no
TMEM237	0.0563833	2.5562	no
TMEM184C	0.0564462	-2.55555	no
SSR2	0.0564939	-2.55506	no
GUCY2D	0.0566009	-2.55396	no
CLECL1	0.0567325	2.5526	no
TGM3	0.0569682	-2.55018	no
FAM163B	0.0570215	-2.54963	no
CPLX4	0.0570799	-2.54904	no
OLFM1	0.0571462	-2.54836	no
MCM8	0.0572431	-2.54737	no
PSPH	0.0573895	-2.54587	no
C2CD2	0.0575525	-2.54421	no
ZNF831	0.0577704	2.542	yes
BAZ2A	0.0578267	-2.54143	no
MYOT	0.0578362	-2.54134	no
KLF14	0.0578368	2.54133	no
CD81	0.0579838	2.53984	no
TRIM68	0.0579957	2.53972	no
SMPD2	0.0580307	2.53937	no
LILRA3	0.0580512	-2.53916	no
WNK4	0.0580595	2.53908	no
ODF3L1	0.0580848	-2.53882	no
NHP2	0.0581095	-2.53858	no
RNF168	0.058167	-2.538	no
SEC22C	0.0582589	-2.53707	no
SIAE	0.0582846	-2.53681	no
SLC7A7	0.058321	-2.53645	no
SLC25A11	0.0584202	-2.53545	no
STAP2	0.0584417	-2.53523	no
IGSF11	0.058463	-2.53502	no
FARSB	0.0585614	-2.53403	no
BAIAP2L1	0.0586608	2.53304	no
ARSB	0.0587485	-2.53216	no
ANKRD27	0.05878	2.53185	no
ATP6V0E2	0.0588757	2.53089	no
TDP2	0.0588818	2.53083	no
ACAP2	0.0588956	-2.53069	no
SMARCC2	0.0589397	2.53025	no
TAS2R19	0.0589582	2.53007	no
TMEM220	0.0592101	-2.52756	no
MS4A6A	0.0592887	-2.52678	no
TP53I11	0.0594896	-2.52479	no
SNORD21	0.0594943	2.52475	no
SPTBN1	0.0595007	2.52468	no
SDSL	0.0595148	-2.52454	no
MRPS14	0.0595291	2.5244	no
FUCA2	0.0595626	-2.52407	no
APLNR	0.0596185	2.52352	no
CETN1	0.0596188	2.52352	no
TRIM71	0.0596548	2.52316	no
RPL22L1	0.0596565	-2.52315	no
WDR33	0.0597022	2.52269	no
LINC00303	0.0597309	-2.52241	no
OSBPL7	0.0597993	2.52174	no
FKBP4	0.059804	2.52169	no
SAT2	0.0598162	-2.52157	no
SLC26A4	0.0598171	-2.52156	no
FERMT3	0.05983	-2.52143	no
LRRC48	0.0599694	-2.52006	no
PKD1L3	0.0600259	-2.51951	no
IL17B	0.0600267	2.5195	no
SFXN5	0.0600938	-2.51884	no
AMFR	0.0602633	-2.51718	no
PPFIBP2	0.0603483	-2.51635	no
S100A7L2	0.0603676	-2.51616	no
IFIT2	0.0604137	-2.51571	yes
CUTA	0.0606327	2.51358	yes
ROGDI	0.0606591	-2.51332	no
C14ORF182	0.0606933	-2.51299	no
PGBD1	0.060918	-2.51081	no
ESR1	0.0610599	-2.50943	no
ATF5	0.0611348	-2.50871	no
SEC31A	0.0611615	-2.50845	no
TEX101	0.0611819	-2.50825	yes
IFNE	0.0613259	2.50686	no
PLAUR	0.0613635	-2.5065	no
CCR1	0.0614135	-2.50602	no
HS3ST4	0.0614365	-2.50579	no
PCCB	0.06146	2.50557	no
INHBA	0.0614969	2.50521	no
RPL23	0.0615548	2.50466	no
PPRC1	0.0616056	2.50417	no
FNDC4	0.0616305	-2.50393	no
ERBB2	0.0616574	2.50367	yes
TOR1A	0.0616902	-2.50336	no
FAM150A	0.0617162	2.50311	no
UPP1	0.0617427	-2.50285	yes
SIAH1	0.0618175	-2.50213	no
SOX7	0.0619342	2.50102	no
KIR2DL5B	0.0620825	2.4996	no
APRT	0.0621513	2.49894	no
MS4A2	0.0621732	-2.49873	yes
ZFYVE9	0.062231	-2.49818	no
SLC19A1	0.0623165	-2.49737	yes
MAGI3	0.0624137	-2.49644	no
EPCAM	0.0624728	-2.49588	no
NFASC	0.0625159	-2.49547	no
LOC153684	0.0625202	-2.49543	no
NTSR1	0.0625931	-2.49474	no
GJA10	0.0626435	-2.49426	no
ACPL2	0.0626762	-2.49395	no
FAM35A	0.0627223	2.49352	no
EBF3	0.0627567	2.49319	no
GMCL1P1	0.0628007	2.49278	no
ASGR1	0.0628489	-2.49232	no
TIE1	0.0629086	-2.49176	no
CLDN9	0.0629322	-2.49153	no
KIF5A	0.0629472	-2.49139	no
NHLRC1	0.062956	-2.49131	no
CLEC4GP1	0.0630354	2.49056	no
DGCR2	0.0632374	-2.48866	no
MACF1	0.0632716	2.48834	no
BBS7	0.063274	2.48831	no
SIX5	0.0633152	2.48793	no
ARGFX	0.0635497	2.48573	no
C9ORF172	0.0635571	-2.48566	no
TSPAN16	0.0635739	-2.4855	no
ASPHD2	0.063603	-2.48523	no
JOSD2	0.0636286	-2.48499	no
RAI14	0.0636403	2.48488	no
KIAA1191	0.0636776	2.48453	no
KIF1B	0.0636969	-2.48435	no
HSPB9	0.0638091	-2.4833	no
CFD	0.0638332	-2.48308	no
BTBD10	0.0638489	-2.48293	no
EPHA3	0.0638688	-2.48275	no
CDK17	0.064002	2.4815	no
ZNF568	0.0640343	2.4812	no
SS18L2	0.0640358	2.48119	no
HMGCS1	0.0641864	-2.47979	no
ADA	0.064323	2.47852	no
NNAT	0.0643287	-2.47847	no
MBLAC2	0.0643516	2.47826	no
TSPO2	0.0643623	-2.47816	no
OR5B2	0.0644407	-2.47743	no
C9ORF96	0.0645423	2.47649	no
ZNF285	0.0645768	2.47617	no
MS4A7	0.0646047	-2.47591	no
C19ORF59	0.0646283	-2.4757	yes
FUT2	0.064629	2.47569	no
SH3TC1	0.064647	-2.47552	no
CLEC5A	0.0646907	-2.47512	no
C8ORF48	0.0647012	-2.47502	no
SELRC1	0.0647293	-2.47476	no
AMY2A	0.0648417	-2.47373	no
STC2	0.0649127	2.47307	no
NSF	0.0649588	-2.47265	no
SLC25A19	0.0649596	2.47264	no
CDCA5	0.0650109	2.47217	no
C22ORF15	0.0651207	-2.47116	yes
CLIC1	0.0651712	-2.4707	no
PPIL1	0.0652317	2.47014	no
HERC2P2	0.0652435	-2.47004	no
LOC440356	0.0653953	2.46865	no
LINC00521	0.0654053	-2.46856	no
ABL1	0.0654726	2.46794	no
GPR141	0.0655225	-2.46748	no
CADM4	0.0655624	-2.46712	no
IL15RA	0.0656011	-2.46677	no
AKAP1	0.0656504	2.46632	no
OR1D2	0.0656914	2.46594	no
OSTALPHA	0.0658788	-2.46424	no
AKT3	0.0659962	2.46317	no
LPHN3	0.0661524	2.46175	no
LGALS3BP	0.0663718	-2.45977	no
ZFP42	0.0664432	2.45912	no
GAB4	0.066463	-2.45894	no
FAM151B	0.0665147	-2.45848	no
MC4R	0.0666056	-2.45766	no
CLLU1OS	0.066874	-2.45524	no
LILRA5	0.0668748	-2.45524	yes
CCDC92	0.0668786	2.4552	no
C2ORF15	0.0669042	2.45497	no
BEST1	0.0670449	-2.45371	yes
FETUB	0.0671901	-2.45241	no
MR1	0.0673032	-2.4514	no
POLR3A	0.0674123	2.45043	no
SETD1A	0.0675018	2.44963	no
CSN1S1	0.0675104	-2.44955	no
CCT2	0.0675451	2.44924	no
PTPN5	0.0675742	-2.44898	no
KLHL5	0.0675825	-2.44891	no
TMF1	0.067616	-2.44861	no
PRPF18	0.0677404	2.44751	no
HOXC8	0.0677438	-2.44748	no
FBL	0.0678374	2.44664	yes
COPA	0.0678377	2.44664	no
KRT27	0.0678588	-2.44645	no
TBX3	0.0678918	2.44616	no
JAK2	0.0679021	-2.44607	no
MTG1	0.0680986	2.44433	no
TLR9	0.0682478	-2.44301	no
MYL7	0.0685217	-2.4406	no
ZBTB8A	0.0685598	-2.44026	no
IPO13	0.0685718	-2.44015	no
ZNHIT6	0.0686941	2.43908	no
B3GNT3	0.0687818	2.43831	no
P2RX5	0.0688955	2.43731	no
ERGIC1	0.0689616	2.43673	no
LRRTM4	0.0690221	2.4362	no
C1ORF105	0.0690342	2.4361	no
UGT2B11	0.0691936	2.43471	no
STMN1	0.0692103	2.43456	no
TGM6	0.0693116	2.43368	no
BMP8A	0.0693778	2.4331	no
LINC00173	0.0694015	-2.43289	yes
HSPE1	0.0694042	2.43287	yes
GOLT1A	0.0694053	-2.43286	no
ADCY4	0.0694157	-2.43277	no
POLE3	0.069476	2.43224	no
MTMR3	0.069477	-2.43223	no
YTHDF1	0.0694796	-2.43221	no
HABP2	0.0696671	-2.43058	no
TNP2	0.0697366	2.42998	no
TCEANC2	0.0698015	-2.42942	no
TNRC18	0.0699224	-2.42837	no
CPNE4	0.0699401	-2.42821	no
F13A1	0.0699609	-2.42803	no
VGF	0.0699701	-2.42796	no
PDSS1	0.0700362	-2.42738	no
SH3BP5L	0.0700484	-2.42728	no
HTR3C	0.0700958	-2.42687	no
ZNF165	0.070163	2.42629	no
IGFL3	0.070202	2.42595	no
TXNDC12	0.0703504	2.42467	no
TMEM158	0.0704346	-2.42395	yes
C1ORF162	0.0705517	-2.42294	no
EXOC6	0.0706984	-2.42168	no
CES3	0.0707651	-2.42111	no
PLSCR3	0.0708076	2.42074	no
FAM131C	0.0708081	2.42074	no
OR4D9	0.0709041	-2.41992	no
S1PR1	0.0710199	2.41893	no
USP3	0.0710444	-2.41872	no
LY86	0.071287	-2.41665	no
DENND3	0.0713749	-2.4159	yes
PROS1	0.0714007	-2.41568	no
ZAR1L	0.0714099	2.4156	no
ADAM15	0.0714235	-2.41548	no
SYNGAP1	0.0715124	-2.41473	no
SUCNR1	0.0715992	-2.41399	no
PRICKLE1	0.0718036	2.41226	no
MS4A10	0.0719114	2.41135	no
SUPV3L1	0.0721398	2.40941	no
ENDOD1	0.0721464	-2.40936	no
2011-09-01	0.0722049	2.40887	no
TPD52L2	0.0722421	-2.40855	yes
TMEM63C	0.0722911	2.40814	no
O3FAR1	0.0723044	-2.40803	no
ATP10D	0.0724671	-2.40666	no
ARIH2	0.0724679	2.40665	no
SIN3A	0.0724787	2.40656	no
LRRC8A	0.0726923	2.40477	no
RAP1GAP	0.0726924	-2.40477	no
KCNC3	0.0727069	2.40464	no
BCAT2	0.0727442	2.40433	no
EPC1	0.0727887	2.40396	no
GM2A	0.0727892	-2.40395	no
CCDC3	0.0728922	-2.40309	no
DST	0.0729376	-2.40271	no
ITGAD	0.073025	2.40198	no
IMP3	0.0730299	2.40194	no
C11ORF80	0.0730506	2.40177	no
B3GNT1	0.0730728	2.40158	no
ARL8A	0.0730823	-2.4015	no
FGFR1OP	0.0731045	2.40132	no
TIMP2	0.0731061	-2.4013	no
GSTM5	0.0731686	2.40078	no
F5	0.0731822	-2.40067	no
PJA2	0.0732149	-2.4004	no
ZNF614	0.0734176	2.39871	no
TSTA3	0.0734353	-2.39856	no
GRID1	0.0734741	2.39824	no
SPATA6	0.0735489	2.39762	no
UNC119	0.0735931	-2.39725	no
L3MBTL2	0.0736257	2.39698	no
G6PC3	0.0736852	-2.39649	no
SRRM2	0.0736893	2.39645	no
AHI1	0.0739064	2.39465	no
KCNK16	0.0740226	2.39369	no
RAB20	0.0741594	-2.39256	no
ZNF85	0.0743052	2.39136	no
OR2A2	0.074333	-2.39113	no
OR2AG2	0.0743726	2.39081	no
MRPL48	0.0744187	2.39043	no
RBM39	0.0744308	2.39033	no
BLCAP	0.0744716	-2.38999	no
CIT	0.0745019	-2.38974	no
LOC388387	0.0745201	-2.38959	no
RBM43	0.0746069	-2.38888	no
ARL5B	0.0748825	-2.38662	no
KIF3B	0.0749574	2.38601	no
GUSBP4	0.074982	2.38581	no
VASP	0.0749855	-2.38578	no
CASC5	0.0750338	2.38538	no
PHLDA1	0.0750849	2.38496	no
VWA3A	0.0750873	-2.38494	no
SH2D1B	0.0751456	2.38447	yes
NMNAT2	0.0754782	2.38176	no
NDRG3	0.0754787	2.38175	no
ZIK1	0.0754957	2.38162	no
TUBA3E	0.0755803	-2.38093	no
TMEM30A	0.0756929	2.38001	no
FGF4	0.0756974	-2.37998	no
ATP2C1	0.0757534	2.37952	no
NLRC4	0.0757656	-2.37942	no
LIMK1	0.0757667	-2.37942	no
TBC1D26	0.0758044	-2.37911	no
UBE2E3	0.075817	2.37901	no
C11ORF2	0.0758366	2.37885	no
KANK4	0.075971	2.37776	no
SPNS1	0.0760432	-2.37718	no
WNT4	0.0761325	-2.37646	no
NKG7	0.0761473	2.37634	no
WIF1	0.0762204	-2.37575	no
DBP	0.0763669	-2.37456	no
ANKRD9	0.0763725	-2.37452	yes
ASH2L	0.0764207	-2.37413	no
MPEG1	0.0764681	-2.37375	no
P2RX1	0.0765104	-2.37341	no
CD160	0.0766488	2.3723	no
TSTD2	0.0766746	-2.37209	no
HTR3A	0.0767492	2.37149	no
HIBCH	0.0768193	2.37093	no
PIGN	0.0771055	2.36864	no
CNOT4	0.0771157	-2.36856	no
MTMR14	0.0771165	-2.36855	no
CABLES1	0.0771574	-2.36822	no
TOMM7	0.0772508	2.36748	yes
HNRNPA3P1	0.0772901	-2.36716	no
XKR5	0.0773792	-2.36645	no
TRIM36	0.0774832	2.36562	no
FBXW11	0.0774836	2.36562	no
LPO	0.0775137	2.36538	no
PPM1G	0.0775669	2.36496	no
PRMT1	0.0775676	2.36495	no
STEAP4	0.0776121	-2.3646	no
TRPA1	0.0776654	-2.36418	no
NTM	0.077754	-2.36347	no
PPP1R1B	0.0777557	2.36346	no
TMEM48	0.077837	2.36281	no
JTB	0.0779794	2.36168	no
PTMA	0.0779913	2.36159	no
CEP112	0.0780793	2.36089	no
NAPA	0.0782739	-2.35936	no
PIK3CD	0.0784265	-2.35815	no
UPK3A	0.0784833	-2.3577	no
SOCS1	0.0785667	-2.35705	yes
KCTD12	0.0786836	-2.35613	no
PRR23C	0.0787701	-2.35545	no
BAG4	0.0788973	2.35445	no
RANGAP1	0.0789197	2.35427	no
VAMP3	0.0789548	-2.354	no
MED19	0.079041	2.35332	no
SPTBN4	0.079148	2.35248	no
DZIP3	0.0792053	2.35204	no
CHD6	0.0793047	2.35126	no
SLC22A15	0.0793905	-2.35059	no
CYFIP2	0.0795519	2.34933	no
DNAH12	0.0796151	2.34884	no
OR6C2	0.079771	-2.34762	no
SERBP1	0.0798451	2.34705	no
CCDC25	0.0798574	2.34695	no
GTF2H4	0.0799747	2.34604	no
ALPK1	0.0800922	-2.34513	no
NCK1	0.0802606	2.34383	no
DOLPP1	0.0802612	2.34382	no
S100A6	0.0803016	-2.34351	no
RG9MTD3	0.0804529	-2.34234	no
RNASE8	0.0805501	2.34159	no
MTFR1	0.0805843	2.34133	no
TEX10	0.0806182	2.34106	no
DAB2IP	0.0806267	2.341	no
C20ORF197	0.080669	-2.34067	no
PRKCG	0.0807368	2.34015	no
INF2	0.0807962	2.33969	no
C1ORF88	0.0808027	-2.33964	no
VPS37D	0.0808074	-2.33961	no
SAFB	0.080872	2.33911	no
CD36	0.0808791	-2.33906	no
PRKCZ	0.0809502	-2.33851	no
C9ORF9	0.080986	2.33823	no
MTERFD3	0.08099	2.3382	no
ABHD14A	0.0810953	2.33739	no
FCN2	0.0811168	2.33723	no
HLCS	0.0811776	2.33676	no
ZNF200	0.0811984	-2.3366	no
TSHZ1	0.0811999	2.33659	no
ANKRD30A	0.0812083	2.33653	no
ZNF525	0.0812842	2.33595	no
RIC8B	0.0813026	2.33581	no
DUSP11	0.0813817	2.3352	no
EPB41L4A	0.0814299	-2.33483	no
STRADA	0.081544	-2.33396	no
RPS3	0.0816099	2.33346	no
HAT1	0.0818212	2.33185	no
ZNF37A	0.0818321	2.33176	no
IMP4	0.0818748	2.33144	no
NFKBIB	0.0818768	-2.33142	no
KCNK9	0.0819107	-2.33116	no
PSMD13	0.0819359	-2.33097	no
GAB2	0.0820025	-2.33047	yes
APOA1BP	0.08204	2.33018	no
PLXDC2	0.0821241	-2.32954	no
LIN28A	0.0821568	2.32929	no
SERPINA5	0.0821686	-2.3292	no
ZNF821	0.0821711	2.32918	no
GON4L	0.0821899	2.32904	no
OR10J5	0.0823163	2.32808	no
LIMA1	0.0824562	2.32702	no
KIN	0.082459	-2.327	no
FABP7	0.0824591	-2.327	no
C6ORF106	0.0824607	-2.32699	no
CLIC3	0.0824706	2.32691	no
CALCRL	0.0825068	-2.32664	no
SRR	0.0825117	2.3266	no
KHNYN	0.0826611	-2.32547	no
ZNF521	0.0826636	-2.32545	no
ANKMY1	0.0827538	2.32477	no
ITGB5	0.0828179	-2.32429	no
TRAF5	0.0829976	2.32294	no
C9ORF114	0.0831015	2.32215	no
ZNF665	0.0831624	-2.32169	no
ADAMTS18	0.0833223	-2.32049	no
TMUB2	0.0833743	-2.3201	yes
CRY2	0.0834676	2.3194	no
CSTL1	0.0837316	-2.31743	no
ZFP57	0.0837747	-2.31711	no
HEATR8	0.083888	-2.31626	no
FFAR1	0.0838907	-2.31624	no
BLOC1S1	0.0839943	-2.31547	no
HCAR2	0.0840258	-2.31523	no
FRRS1	0.0840299	-2.3152	no
CROCCP3	0.0840619	-2.31496	no
CEACAM8	0.0841101	2.3146	no
CNR1	0.0841226	-2.31451	no
ZSWIM1	0.0841349	-2.31442	no
LCP2	0.0841588	-2.31424	no
OSBPL10	0.0842279	2.31373	no
APOF	0.0843552	2.31278	no
DHX38	0.0843628	2.31272	no
USP54	0.0843688	2.31268	no
HLA-DOA	0.0843722	2.31265	no
RAB4B	0.0844042	-2.31242	no
TFR2	0.0846046	2.31093	no
LINC00085	0.0847331	-2.30998	no
CCDC149	0.0848661	-2.30899	no
C1QTNF7	0.0848736	-2.30894	no
BACH2	0.0848895	2.30882	no
PTP4A3	0.0848948	-2.30878	no
MLLT6	0.08498	2.30815	no
CLSTN3	0.0850195	2.30786	no
MESP2	0.0850778	2.30743	no
GAS7	0.0851001	2.30726	no
LGALS9	0.0851831	-2.30665	no
PGLS	0.0852499	-2.30616	no
HTR2B	0.0853651	2.30531	no
GTSF1	0.0854032	2.30503	no
GALR2	0.0854403	2.30476	no
SCARNA9	0.0854708	2.30453	no
LOC400043	0.0855955	2.30362	no
SYCP2L	0.085611	-2.3035	no
ITGA2B	0.0856621	-2.30313	no
ISG15	0.0856875	-2.30294	no
CCL5	0.0856893	2.30293	no
STAG3	0.0858428	2.3018	no
NT5C3	0.0858858	-2.30149	no
MCM6	0.0859578	2.30096	no
FGF17	0.086095	2.29996	no
CACNG2	0.0861662	2.29943	no
PTCHD3	0.0861788	-2.29934	no
SLTM	0.0861999	2.29919	no
NPY6R	0.086285	-2.29857	no
PPP1R9B	0.0862853	-2.29856	no
OR11H6	0.0863223	-2.2983	no
ENTPD2	0.0863549	2.29806	no
KCNIP1	0.0863802	2.29787	no
DTX3L	0.0864168	-2.29761	no
SEL1L2	0.0864273	-2.29753	no
MOSPD3	0.0864357	-2.29747	no
MIA2	0.086773	-2.29501	no
NYAP1	0.0867806	-2.29496	no
ZNF426	0.0868042	2.29479	no
RBM17	0.0868853	2.2942	no
RARRES2	0.0869262	-2.2939	no
NHEJ1	0.087004	2.29334	no
RNF24	0.0871163	-2.29252	yes
NFIL3	0.0871516	-2.29227	no
MADCAM1	0.0871656	-2.29217	no
EXOSC5	0.0872564	-2.29151	no
FAM214B	0.0873881	-2.29056	no
TLR2	0.0874106	-2.2904	yes
NDUFA5	0.0874406	2.29018	no
C4ORF40	0.0875999	-2.28903	no
MARCH10	0.0876349	2.28878	no
RNF4	0.087687	2.2884	no
AK3	0.0877134	2.28821	no
DKFZP686I15217	0.0877882	-2.28767	no
HCST	0.0877919	2.28765	no
DNAH2	0.0878019	-2.28758	no
GOLGA7	0.0878141	-2.28749	no
LRCH1	0.0878917	2.28693	no
HOMER2	0.0878941	-2.28691	no
ZNF615	0.0879056	2.28683	no
PEAK1	0.0879162	-2.28675	no
DCTPP1	0.0879408	2.28658	no
HIST1H2BM	0.0879519	-2.2865	no
SERINC2	0.0879648	-2.2864	no
ANKRD23	0.0879786	-2.2863	no
EEF1DP3	0.088034	-2.28591	no
SLCO3A1	0.0880547	-2.28576	no
PTPRCAP	0.0880832	2.28555	no
GLT1D1	0.0881275	-2.28524	no
LHPP	0.0882806	-2.28414	no
LYVE1	0.0882995	-2.284	no
ZBTB41	0.0883258	2.28381	no
RAMP3	0.0883404	2.28371	no
H1F0	0.0883872	-2.28337	no
CPSF1	0.0884157	2.28317	no
PLK1	0.0884227	2.28312	no
LINC00478	0.0885269	2.28237	no
CLSPN	0.0885381	-2.2823	no
GAK	0.0887682	2.28065	no
SH3PXD2A	0.0887891	2.2805	no
GRWD1	0.0888033	2.2804	no
SCGB3A1	0.0888328	2.28019	no
DYNC2LI1	0.088874	-2.2799	no
GDF3	0.0889144	-2.27961	no
FAM3D	0.0889443	2.2794	no
NPFFR1	0.0889659	2.27924	no
PHIP	0.0891269	-2.2781	no
TLCD1	0.0891652	-2.27783	no
BAK1	0.0891937	-2.27762	no
NUDT16	0.089237	-2.27731	no
PCDHA5	0.0892644	2.27712	no
SDF2	0.0893822	2.27628	no
PID1	0.0895216	-2.2753	no
KDELC1	0.0895737	2.27493	no
CD9	0.0895884	-2.27482	no
POLB	0.0895938	-2.27478	no
SSR3	0.0896078	2.27469	no
C16ORF62	0.0896401	2.27446	no
MICALL1	0.0896737	2.27422	no
SHISA5	0.0896926	-2.27409	no
MGC57346	0.0897021	2.27402	no
RACGAP1	0.089732	2.27381	no
GEMIN6	0.0897915	2.27339	no
FOXK1	0.0898415	2.27303	no
ZNF616	0.0898458	2.273	no
MCM2	0.0898958	2.27265	no
EDDM3B	0.0899362	2.27236	no
BLK	0.0899939	2.27196	no
CYYR1	0.0900156	2.2718	no
C19ORF38	0.0901391	-2.27093	no
NPTXR	0.0901536	2.27083	no
RBM4B	0.0902432	2.2702	no
FBXO25	0.0902614	-2.27007	no
CHD5	0.0902737	-2.26999	no
MSC	0.0903092	2.26974	no
CXCL10	0.0903289	-2.2696	yes
CDK7	0.0903438	2.26949	no
ZNF420	0.090359	2.26939	no
LOC283174	0.0903766	2.26926	no
NAGA	0.0905083	-2.26834	no
C4ORF52	0.0905375	2.26813	no
DNAJC5B	0.0905667	-2.26793	no
YIPF2	0.0906334	-2.26746	no
FKBP9L	0.0906943	-2.26703	no
SMR3A	0.0907926	-2.26634	no
LY9	0.0908301	2.26608	no
CHST8	0.0908603	-2.26587	no
NDFIP2	0.0909271	2.2654	no
NADSYN1	0.0909346	-2.26535	no
SOX18	0.0910375	-2.26463	no
PLCL1	0.091107	2.26414	no
CPEB3	0.0911326	-2.26396	no
ZFP106	0.0911546	-2.26381	no
ANKRD42	0.0911577	2.26379	no
ESYT1	0.0911921	2.26355	no
CXCL5	0.0912638	2.26305	no
SBNO2	0.0913048	-2.26276	no
AACS	0.0914074	2.26205	no
INSM2	0.0914137	-2.262	no
TMPRSS9	0.0914352	2.26185	no
TAKR	0.0914481	2.26176	no
PMS2CL	0.0915082	2.26135	no
LRRK2	0.0915316	-2.26118	no
IL7R	0.0915798	2.26085	no
ISM2	0.0916017	2.26069	no
ENOX1	0.0916231	-2.26055	no
SLC45A4	0.0916265	-2.26052	yes
EIF3M	0.0916471	2.26038	no
GBF1	0.0917671	-2.25955	no
OR5B21	0.0919312	2.25841	no
ZSWIM6	0.0919753	-2.2581	no
INO80C	0.0919821	-2.25805	no
LAMA5	0.0920253	2.25775	no
SVOPL	0.0920968	2.25726	no
CST4	0.0921397	-2.25696	no
SPINT1	0.0922763	2.25602	no
ZWILCH	0.0922783	2.256	no
NUDCD2	0.0923403	2.25557	no
REXO2	0.0923751	2.25533	yes
PIWIL1	0.0924137	2.25507	no
MGC15885	0.0925159	-2.25436	no
TMEM88B	0.092516	2.25436	no
BCAN	0.0925166	2.25436	no
KIAA0100	0.0925963	-2.25381	no
GOLGA2	0.0927195	-2.25296	no
C5ORF46	0.0928147	-2.2523	no
SH3RF3	0.0928317	-2.25219	no
SIGLEC1	0.0928488	-2.25207	no
SLC40A1	0.0929193	-2.25158	no
SLC8A3	0.0929665	-2.25126	no
ALKBH1	0.093106	2.2503	no
POU3F2	0.0933252	-2.2488	no
RAB6A	0.0934069	-2.24824	no
GBA3	0.0934207	-2.24814	no
STXBP4	0.0935305	2.24739	no
BCL11B	0.0935356	2.24736	no
C17ORF62	0.0936277	-2.24673	no
BTNL2	0.0937246	2.24606	no
ZNF280D	0.0938517	2.2452	no
DSC3	0.0939081	2.24481	no
TLR4	0.0939435	-2.24457	no
ZNF57	0.0939468	-2.24455	no
ZHX3	0.0939539	2.2445	no
VCL	0.0940478	-2.24386	no
CD244	0.094095	2.24354	no
FLNB	0.0940995	2.24351	no
PARP11	0.0941837	-2.24294	no
LYZL4	0.0941889	2.2429	no
LINC00238	0.0942028	2.24281	no
CCNT1	0.0942233	2.24267	no
IPMK	0.0944062	-2.24142	no
HLA-L	0.0944851	-2.24089	no
EFTUD1	0.094616	2.24	no
CCR9	0.0946961	2.23946	no
OR52K2	0.0947045	-2.2394	no
UCK1	0.0949472	-2.23776	no
SEMG2	0.0949792	2.23754	no
KLHL31	0.0950103	-2.23733	no
SPATA17	0.0950333	2.23718	no
CCIN	0.095048	-2.23708	no
RPUSD3	0.0950703	2.23693	no
DND1	0.0950851	-2.23683	no
BATF2	0.095108	-2.23667	no
C9ORF117	0.0951334	-2.2365	no
TGFBR3	0.0951544	2.23636	no
NEUROD4	0.0953162	2.23527	no
DMXL2	0.09555	-2.2337	no
RYR1	0.0955713	-2.23355	no
TMEM234	0.0956562	-2.23298	no
R3HCC1	0.0956655	2.23292	no
ATAD2	0.095683	2.2328	no
APOBR	0.0956936	-2.23273	no
PDE4DIP	0.0958832	2.23146	no
LYRM1	0.0958976	-2.23136	no
GNB1	0.0959244	2.23118	no
MYO1F	0.0961116	-2.22993	yes
ETFA	0.0961811	2.22946	no
AP1M1	0.0962048	2.2293	no
HSPA1L	0.0962159	-2.22923	no
LYPD2	0.0962465	2.22903	no
DIRC2	0.0962629	-2.22892	no
IL10RB	0.0963109	-2.2286	no
ALG3	0.0963421	2.22839	no
EIF2S1	0.0963478	2.22835	no
PRR13	0.096401	-2.22799	no
NCF4	0.096546	-2.22703	yes
PITPNA	0.0966397	-2.2264	no
RAD18	0.0967045	-2.22597	no
KCTD10	0.0967088	2.22594	no
OSBPL3	0.0967845	2.22544	no
EIF4E2	0.0968334	-2.22511	no
LPHN1	0.0968364	2.22509	no
JSRP1	0.0970142	2.22391	no
NOTCH4	0.0972207	-2.22254	no
MKNK2	0.097314	-2.22192	no
OR5M9	0.0975584	-2.2203	no
KLRD1	0.0975813	2.22015	yes
RNF220	0.097596	2.22005	no
ID1	0.0975987	-2.22004	no
LAIR1	0.0976033	-2.22001	no
MPHOSPH6	0.0976395	2.21977	no
TTC39C	0.0977572	2.21899	no
RCL1	0.0978089	2.21865	no
C11ORF75	0.0978222	-2.21856	no
WFDC6	0.0980111	2.21731	no
HIST2H2BF	0.0980232	-2.21723	no
THNSL2	0.0981238	2.21657	no
RTBDN	0.0981565	2.21636	no
BCL9	0.0981699	2.21627	no
RPL24	0.0981882	2.21615	no
TMEM179B	0.0982766	-2.21557	no
PROL1	0.098287	-2.2155	no
ZFAND3	0.0982919	-2.21547	no
CYP20A1	0.098318	2.21529	no
ZNF219	0.0984093	-2.21469	no
PAICS	0.0984182	2.21464	no
ANKRD53	0.0985656	2.21367	no
DCAF16	0.0985963	2.21347	no
TSPYL5	0.0987216	2.21265	no
PDZD9	0.0987241	2.21263	no
LOC284009	0.0987771	-2.21228	no
CALCOCO2	0.098869	-2.21168	no
CIB1	0.0989376	2.21123	no
KLHL3	0.0990265	2.21065	yes
CRY1	0.0990334	2.21061	no
FADS6	0.0990983	-2.21018	no
NKX2-8	0.0991082	-2.21012	no
CCDC138	0.0991487	2.20985	no
CCDC94	0.0991897	-2.20959	no
MX1	0.0992764	-2.20902	yes
HNRNPR	0.0992835	2.20897	no
DNAJA3	0.0992862	2.20896	no
FAM46A	0.0992877	-2.20895	yes
RRAGD	0.0993454	-2.20857	no
HTRA1	0.0993793	2.20835	no
KLKB1	0.0993991	2.20822	no
LAT2	0.0994192	-2.20809	yes
CDH3	0.09946	2.20782	no
KRTAP13-4	0.0995055	-2.20753	no
S100A3	0.0995374	-2.20732	no
ATP5A1	0.0997057	2.20622	no
ABAT	0.0998043	2.20558	no
FAM149A	0.0998402	2.20535	no
DDHD2	0.0998589	2.20523	no
ATP6V1E2	0.0998983	2.20497	no
GPR12	0.0999785	-2.20445	no
ADAP2	0.100026	-2.20414	no
LPPR5	0.10004	2.20406	no
ZNF512B	0.100118	2.20355	no
LOC645676	0.100239	2.20277	no
LLGL2	0.10044	-2.20147	no
FZD4	0.100591	2.20049	no
GNPTAB	0.100624	2.20028	no
FAM76A	0.100646	2.20014	no
ESPNL	0.100649	2.20012	no
INPP5B	0.10069	2.19985	no
PRKCD	0.100698	-2.1998	no
S100A9	0.100725	-2.19962	no
PARM1	0.100754	2.19944	no
SOAT1	0.100896	-2.19852	no
C21ORF90	0.100898	-2.19851	no
ALDH2	0.100921	-2.19837	no
DACT1	0.10097	-2.19805	no
HRASLS2	0.101031	-2.19766	no
OR5F1	0.101197	2.19659	no
SAMSN1	0.10134	-2.19567	no
FABP3	0.101385	-2.19538	no
TOM1L1	0.101408	-2.19524	no
RFX4	0.101496	2.19467	no
SPA17	0.101501	2.19464	no
TM4SF19	0.101518	2.19453	no
PTPDC1	0.101537	-2.19441	no
ZBTB3	0.101538	2.1944	no
SMAD9	0.101566	-2.19422	no
SYT17	0.101576	-2.19416	no
HEYL	0.101622	-2.19386	no
KRTAP5-8	0.101744	-2.19308	no
OR2A9P	0.101764	2.19295	no
SPATA7	0.101779	2.19286	no
GRIP2	0.101842	-2.19245	no
HUS1	0.101863	-2.19232	no
DLEC1	0.102103	-2.19079	no
NMT2	0.102166	2.19039	no
CASP8	0.102414	2.18881	no
C1ORF168	0.102432	2.1887	no
XPC	0.102486	2.18835	no
CEND1	0.102523	2.18812	no
BNIP1	0.102703	2.18697	no
MORN5	0.10276	-2.18661	no
S100PBP	0.102856	2.186	no
RAB43	0.102874	-2.18589	no
LILRA1	0.103077	-2.1846	no
PUSL1	0.103101	-2.18445	no
CPA3	0.103102	-2.18444	yes
ERI3	0.103196	2.18385	no
C7ORF60	0.10326	2.18345	no
RAB11FIP3	0.103325	2.18303	no
CALML3	0.103326	-2.18302	no
LETM1	0.103482	-2.18204	no
LPGAT1	0.103556	-2.18157	no
NRIP2	0.103625	2.18114	no
C1QTNF3	0.103702	-2.18066	no
MFSD10	0.10384	2.17979	no
FAM86C1	0.103846	2.17975	no
IGFL4	0.103898	-2.17942	no
NOVA2	0.103903	-2.17939	no
ARL15	0.103991	2.17883	no
GRINA	0.104027	-2.17861	no
ENPEP	0.104101	2.17814	no
NOP56	0.104139	2.17791	no
CD300C	0.104211	-2.17745	no
CNTN6	0.104213	2.17744	no
GFPT1	0.104239	2.17728	no
TMEM199	0.104258	-2.17716	no
UBE2Q1	0.104395	2.1763	no
OPA3	0.104452	2.17594	no
FABP5P3	0.104496	2.17567	no
ZNF296	0.104547	2.17535	no
ADRA1D	0.104564	-2.17524	no
ALS2CR11	0.104601	-2.17501	no
AOX1	0.104617	-2.17491	no
PMEPA1	0.104753	2.17406	no
ADCK3	0.10476	2.17401	no
BBS1	0.104785	2.17386	no
EFCAB4A	0.104892	2.17319	no
LTF	0.10493	2.17295	yes
OR5AN1	0.104992	-2.17257	no
ACAN	0.105018	-2.1724	no
UNC93B1	0.105035	-2.1723	no
ZNF214	0.105039	2.17227	no
ESPN	0.105061	2.17214	no
APOM	0.105115	2.1718	no
TBC1D2B	0.105151	-2.17158	no
LRRC10B	0.105176	-2.17142	no
CAPN8	0.105219	2.17115	no
TMEM88	0.10534	-2.1704	no
MYH10	0.105492	2.16945	no
PHF13	0.105503	2.16939	no
PAIP2B	0.105587	2.16886	no
THAP1	0.105682	2.16827	no
IQCC	0.105693	-2.1682	no
RB1	0.105769	-2.16774	no
OR14C36	0.10579	-2.1676	no
GPR183	0.105852	2.16722	no
CERS1	0.106022	-2.16617	no
PRSS3	0.106124	-2.16554	yes
LRIG1	0.106215	2.16497	no
KIF21A	0.106287	2.16453	no
FAIM3	0.106323	2.1643	yes
ATP2B1	0.106348	2.16415	no
DNAJB1	0.106386	2.16391	no
GZMB	0.106401	2.16382	yes
AFAP1L2	0.106652	2.16227	no
YES1	0.106652	2.16227	no
KRT75	0.106678	-2.16212	no
ZNF257	0.106779	2.16149	no
ADRB2	0.106844	2.16109	no
DCPS	0.106862	2.16098	no
PRKD2	0.106898	-2.16076	no
PPIL3	0.106956	2.16041	no
OR4C46	0.106994	2.16017	no
PFN3	0.107041	-2.15988	no
GPD1L	0.107047	2.15985	no
C1QL1	0.107123	-2.15938	no
PSMD11	0.107127	-2.15935	no
OXCT2	0.10721	2.15884	no
LRBA	0.107235	2.15869	no
PTBP1	0.107526	2.15691	no
C17ORF103	0.107557	-2.15672	no
KRTAP19-3	0.107663	2.15607	no
ADAMTS6	0.107673	-2.15601	no
FDXR	0.107705	2.15581	no
CD276	0.107714	-2.15576	no
TNPO1	0.107745	-2.15557	no
SPINK9	0.107801	2.15522	no
ART3	0.107829	2.15505	no
GLIS2	0.10783	-2.15505	no
TTC9B	0.107831	2.15504	no
FCRL2	0.107917	2.15452	no
PPAP2C	0.107993	-2.15405	no
SUMF2	0.108031	2.15382	no
SPINLW1	0.108089	-2.15347	no
CDCA7L	0.108122	2.15327	no
PRDX1	0.108153	2.15308	no
SNRPD2	0.108166	2.153	yes
ZNF560	0.108222	-2.15266	no
TCTN3	0.108286	2.15227	no
FLJ40292	0.108345	2.15191	no
CEP57L1	0.108402	2.15156	no
F2R	0.108421	2.15145	no
DYDC1	0.108468	2.15116	no
C1ORF115	0.108544	2.1507	no
MYF6	0.108669	-2.14994	no
SLC25A23	0.108804	2.14912	no
ZNF197	0.108842	2.14889	no
COPB1	0.108896	-2.14856	no
TGM7	0.108937	-2.14831	no
TTLL10	0.108947	-2.14825	no
C14ORF93	0.108969	-2.14812	no
ATR	0.109058	2.14758	no
SUCLG1	0.109368	2.14571	no
UGT2A3	0.109368	2.14571	no
ZBTB6	0.109377	2.14565	no
VMAC	0.109382	-2.14562	no
ERCC2	0.10943	2.14533	no
SWSAP1	0.109523	-2.14477	no
ACTL8	0.10953	-2.14473	no
THAP10	0.109538	-2.14468	no
WARS	0.109592	-2.14436	no
PTPN13	0.109602	2.1443	no
PAPOLB	0.109736	2.14348	no
KLRF1	0.10984	2.14286	no
SRRM4	0.109961	2.14213	no
RASAL3	0.109977	2.14203	no
ENTPD7	0.110231	2.14051	no
EMILIN1	0.110434	-2.13929	no
CD320	0.11072	2.13758	no
TUBB	0.110771	2.13728	no
RPL23AP82	0.110811	2.13703	no
MRO	0.1111	-2.13531	no
PCDHGB6	0.111108	-2.13526	no
PRCP	0.111163	-2.13493	no
TMEM26	0.111391	-2.13358	no
LANCL2	0.111437	2.1333	no
SPINK13	0.111498	-2.13294	no
MAP2K5	0.11168	2.13185	no
PCYT2	0.111683	2.13184	no
ABI3BP	0.111688	2.13181	no
POLDIP2	0.111701	2.13173	no
RRM1	0.111765	2.13135	no
BID	0.111769	-2.13133	no
AK8	0.111821	2.13102	no
ZKSCAN1	0.112102	-2.12935	no
PBOV1	0.112116	-2.12927	no
HSP90AB1	0.112144	2.12911	no
SLC22A4	0.112163	-2.12899	no
EAF2	0.11222	2.12866	no
SIGLEC5	0.112246	-2.1285	yes
ZBTB37	0.112261	2.12841	no
GALNT5	0.112298	2.12819	no
PSAT1	0.112317	2.12808	no
NOP2	0.112356	2.12785	no
ITPRIPL1	0.11248	2.12711	no
FAM182B	0.112567	-2.1266	no
C1ORF185	0.112572	2.12657	no
DECR2	0.112683	2.12592	no
BTG1	0.112712	-2.12574	no
KRTAP12-2	0.112799	2.12524	no
HDHD3	0.112856	2.1249	no
SKIV2L2	0.113075	2.12361	no
OR5A2	0.113135	-2.12326	no
TRIM3	0.113219	2.12276	no
UNC13D	0.113412	-2.12163	no
FAM173B	0.113466	2.12131	no
OSBPL6	0.113488	-2.12118	no
NADK	0.113508	-2.12106	no
EIF2B4	0.113524	2.12097	no
KRTAP13-2	0.113633	2.12033	no
A2M	0.113747	-2.11966	no
HSPH1	0.113827	2.1192	no
C1QA	0.113936	-2.11856	no
SEC16B	0.113964	-2.11839	no
QPCT	0.114186	-2.1171	no
SAMM50	0.114273	2.11659	no
HNRNPK	0.114276	2.11657	no
INTS4L1	0.114313	-2.11635	no
LINC00479	0.114371	-2.11602	no
SLC45A3	0.114373	-2.116	yes
ASF1A	0.114454	2.11553	no
CDK15	0.114573	-2.11484	no
SLC38A3	0.114654	2.11437	no
PSMB8	0.114777	-2.11365	no
CDON	0.11505	2.11207	no
CEACAM22P	0.115181	-2.1113	no
CTSS	0.115214	-2.11112	no
ETV6	0.115214	-2.11111	no
PCM1	0.115238	2.11097	no
RDH12	0.115279	-2.11074	no
CPNE5	0.115316	2.11052	no
PRPF31	0.115321	2.1105	no
FKBP15	0.115415	-2.10995	no
TYRP1	0.115561	-2.1091	no
MAP3K8	0.115579	-2.109	no
ACADL	0.115592	-2.10893	no
FOLR3	0.115619	-2.10877	no
HRH1	0.115666	-2.1085	no
SH3GL1	0.115735	-2.1081	no
C11ORF82	0.115804	-2.1077	no
UBE2L3	0.115905	2.10712	no
CCHCR1	0.115925	-2.107	no
DOCK7	0.116043	2.10632	no
FBXO46	0.116088	2.10606	no
CASP2	0.116124	2.10585	no
LRRN4	0.116264	2.10505	no
TMED1	0.116332	-2.10466	no
UBA52	0.116345	-2.10458	no
HS3ST2	0.1167	-2.10254	no
RGL1	0.116711	-2.10248	no
MOGAT1	0.116869	-2.10158	no
DEGS1	0.116949	-2.10111	no
ESRRG	0.117024	2.10068	no
HLA-DPB1	0.117183	-2.09977	no
KIAA0355	0.117187	2.09975	no
CNFN	0.117233	2.09949	no
ABCA8	0.117335	-2.09891	no
TMEM8A	0.11743	-2.09836	no
GORASP1	0.117434	-2.09834	no
SERINC3	0.117546	-2.0977	no
C18ORF54	0.117565	2.09759	no
MGC16025	0.117656	-2.09707	no
MXD4	0.117666	2.09702	no
HSPA8	0.117701	2.09682	no
AGT	0.117705	-2.0968	no
FAM160B1	0.117856	-2.09593	no
VRK2	0.11786	-2.09591	no
SMTNL1	0.117973	2.09527	no
DYRK3	0.118066	-2.09474	no
GCET2	0.118076	2.09468	no
SAMD13	0.118151	2.09425	no
ARRB2	0.118189	-2.09404	no
CWC22	0.118251	2.09369	no
CACYBP	0.118562	2.09192	no
FAM108B1	0.118607	2.09166	no
CASZ1	0.118671	2.0913	no
TTC18	0.118753	-2.09084	no
RLF	0.118851	2.09028	no
ARC	0.11888	2.09012	no
MEX3C	0.118882	2.09011	no
SPOCD1	0.118971	2.08961	no
RANBP9	0.119008	2.0894	no
KLRC2	0.119095	-2.0889	no
AGTRAP	0.119182	-2.08841	no
CBS	0.119227	2.08816	no
MED10	0.119255	2.088	no
AADAC	0.11933	-2.08758	no
SNORD33	0.119396	2.08721	no
NKAIN3	0.1194	-2.08718	no
RFC1	0.119476	2.08676	no
PDCL2	0.119514	-2.08654	no
AMIGO2	0.119565	-2.08625	no
ISLR	0.119751	2.0852	no
LPPR2	0.119757	-2.08517	no
PGAP3	0.119779	2.08505	no
[truncated: 14,781 more rows]

## Sheet: TG metabolites
Metabolite	p-value	beta	Metabolite in BMTI?
@1oleoylglycerol1monoolein	5.60349e-44	37.4438	yes
@1linoleoylglycerol1monolinolein	3.91235e-34	32.8143	yes
@1palmitoylglycerol1monopalmitin	2.97312e-31	33.676	yes
X-03094	3.27042e-31	31.3996	yes
isoleucine	4.98728e-15	21.6966	yes
@3methyl2oxovalerate	5.85582e-15	21.643	yes
X-12038	2.76195e-14	21.2017	yes
X-11204	2.9953e-14	21.0886	yes
inositol1phosphateI1P	3.65287e-14	24.7519	yes
X-11820	3.72684e-14	21.1368	no
glutamate	1.13148e-12	19.7916	yes
X-12063	4.98881e-12	19.6514	yes
lactate	5.64643e-12	19.1862	yes
urate	3.70833e-11	18.4496	yes
@1myristoylglycerophosphocholine	1.09553e-10	18.0107	yes
valine	1.2655e-10	17.9514	yes
gammaglutamylvaline	2.42613e-10	17.8153	yes
glucose	2.85151e-10	17.6133	yes
@3methyl2oxobutyrate	3.14001e-10	17.5728	yes
alphatocopherol	3.2113e-10	17.5628	no
leucine	3.84126e-10	17.4876	yes
X-14056	1.59904e-09	16.8719	no
X-11317	2.43476e-09	16.6858	no
@34hydroxyphenyllactate	3.363e-09	16.5609	yes
X-11315	4.59782e-09	-16.4002	no
serine	5.19903e-09	-16.3443	no
X-06246	1.21628e-08	16.5947	no
gammaglutamylglutamine	1.65809e-08	-15.8074	no
X-08766	1.80607e-08	20.5657	yes
Nacetylglycine	3.21917e-08	-15.7905	yes
cysteineglutathionedisulfide	3.63245e-08	-14.8416	yes
@4methyl2oxopentanoate	4.15985e-08	15.3678	yes
X-11327	4.5941e-08	15.3196	no
asparagine	9.75466e-08	-14.9209	no
@2stearoylglycerophosphocholine	1.31667e-07	14.7981	no
X-11593	4.24018e-07	14.1961	no
cholesterol	4.41891e-07	14.1744	no
alanine	5.45623e-07	14.0629	yes
inosine	6.65105e-07	-13.4542	no
propionylcarnitine	7.87068e-07	13.8671	yes
@1stearoylglycerophosphoethanolamine	8.34804e-07	14.6644	no
caffeine	8.85376e-07	14.1813	yes
carnitine	1.04422e-06	13.7141	no
benzoate	1.06367e-06	13.7955	no
deoxycholate	1.43811e-06	14.8467	no
X-01911	1.90293e-06	13.621	no
@1palmitoylglycerophosphoethanolamine	1.99627e-06	13.5006	no
X-12456	2.29514e-06	15.1578	no
glycine	2.32614e-06	-13.271	yes
@2palmitoylglycerophosphocholine	3.63874e-06	13.017	yes
X-12510	4.17172e-06	-12.9766	no
@1stearoylglycerol1monostearin	4.23454e-06	15.251	no
gammaglutamylisoleucine	4.62436e-06	15.0043	yes
X-11859	5.51895e-06	12.7249	no
@1palmitoleoylglycerophosphocholine	5.81269e-06	12.7458	no
butyrylcarnitine	6.34569e-06	12.6944	no
proline	8.12987e-06	12.548	yes
@1stearoylglycerophosphocholine	1.31845e-05	12.2575	yes
erythronate	1.33366e-05	12.3405	no
palmitate160	1.72037e-05	12.0947	yes
X-12627	1.87143e-05	12.6217	no
gammaglutamylleucine	2.16733e-05	11.9517	yes
alphahydroxyisovalerate	2.48043e-05	11.8674	yes
glycerol	2.98608e-05	11.7505	yes
threonate	3.09455e-05	-11.7279	no
hyodeoxycholate	3.15415e-05	13.538	no
@1oleoylglycerophosphoethanolamine	3.15443e-05	11.9058	no
@1arachidonoylglycerophosphoethanolamine	3.56066e-05	11.6386	no
X-14478	4.29275e-05	11.5186	no
@3phenylpropionatehydrocinnamate	4.72501e-05	-11.7017	no
@3dehydrocarnitine	4.94309e-05	11.4272	no
succinylcarnitine	5.21819e-05	11.8725	no
pyruvate	6.42103e-05	11.4873	no
@1eicosatrienoylglycerophosphocholine	9.99633e-05	10.9604	no
pseudouridine	0.000105623	10.9231	yes
histidine	0.000112485	-10.8803	yes
X-12441	0.000113703	-10.9512	no
@2hydroxybutyrateAHB	0.000114078	10.8707	yes
caprylate80	0.000114811	10.8664	no
X-04357	0.000122839	10.9005	no
X-11441	0.000127753	-11.0341	no
X-04494	0.000131472	-12.9807	no
@1arachidonoylglycerophosphoinositol	0.000159413	10.6512	no
pelargonate90	0.000162593	10.6267	no
arginine	0.00017383	-10.632	no
palmitoylcarnitine	0.000185376	10.5635	yes
bilirubinZZ	0.000199507	-10.6903	no
margarate170	0.000203174	10.4705	yes
stearoylcarnitine	0.000205564	10.9106	no
@10undecenoate111n1	0.000252489	-10.3161	yes
glutamine	0.000273371	-10.2591	no
kynurenine	0.000281643	10.2376	yes
@7alphahydroxy3oxo4cholestenoate7Hoca	0.000284099	10.2314	no
heptanoate70	0.000308208	10.1725	no
isovalerylcarnitine	0.000324782	10.1344	no
X-12244	0.000343666	10.1006	yes
X-10810	0.000351509	-11.1777	yes
X-06350	0.000369723	12.8711	no
dihomolinolenate203n3orn6	0.000397431	9.98663	no
erythritol	0.0004988	9.83009	no
X-11444	0.000509122	9.92724	yes
@1palmitoylglycerophosphocholine	0.000521292	9.78475	yes
X-11805	0.000549572	9.745	no
X-10419	0.000558163	-9.7333	no
gammatocopherol	0.000571444	13.0435	no
X-12990	0.000678181	10.6395	no
stearate180	0.000692939	9.56879	yes
betaine	0.000720023	-9.53936	no
X-11442	0.000751311	-9.69676	no
phenolsulfate	0.000797528	9.46048	no
glycerophosphorylcholineGPC	0.000918371	-9.3607	yes
X-11469	0.000955078	-9.36128	no
@3hydroxybutyrateBHBA	0.00101594	-9.27132	yes
X-12786	0.0011105	10.4658	no
gammaglutamylphenylalanine	0.00126804	9.11548	yes
X-13477	0.00130497	9.26431	no
nButylOleate	0.00131169	10.7338	no
phenylalanine	0.00131838	9.06372	yes
indolelactate	0.00133628	9.6248	no
tyrosine	0.00133951	9.05091	yes
@3indoxylsulfate	0.00134496	9.04764	yes
caproate60	0.00152517	8.94577	no
X-14208	0.00162074	9.50633	no
X-12524	0.00214583	8.66383	no
guanosine	0.00228552	-8.56011	no
piperine	0.00268619	8.50903	yes
X-11786	0.00275988	-8.45073	no
oleoylcarnitine	0.00277569	8.45768	yes
X-12644	0.00293524	8.39785	no
X-11787	0.00318253	8.32796	no
lysine	0.00334037	8.2859	no
adrenate224n6	0.00347057	8.25254	yes
indolepropionate	0.00349086	-8.24744	no
gammaglutamyltyrosine	0.00368332	7.92754	no
X-12100	0.00382346	8.27588	no
creatine	0.00396814	8.13471	no
X-14450	0.00398862	8.60992	no
@5dodecenoate121n7	0.00443429	-8.10553	yes
bradykinindesarg9	0.00460598	8.42589	no
hexanoylcarnitine	0.00492548	7.94148	yes
X-14473	0.00519697	8.31059	no
X-11809	0.00522243	7.88845	no
threitol	0.00607149	8.01522	no
epiandrosteronesulfate	0.00625889	-7.74185	no
X-02269	0.00635867	-7.77674	no
dihomolinoleate202n6	0.00688979	7.63317	yes
pantothenate	0.00737163	7.716	no
X-11244	0.00754582	7.54778	no
@10heptadecenoate171n7	0.00774355	7.52335	yes
X-11538	0.00829563	-7.46582	yes
X-13671	0.0083736	-7.5272	no
homocitrulline	0.00871961	7.18794	no
X-11530	0.00878745	-7.53492	no
myristate140	0.00906314	7.37325	yes
X-11412	0.00916971	8.38485	no
DSGEGDFXAEGGGVR	0.00961625	-7.31608	no
X-03003	0.00966352	-7.33806	no
@4ethylphenylsulfate	0.00986191	-7.75479	no
dimethylarginineSDMAADMA	0.0100132	7.27683	no
X-11299	0.0103579	-7.90074	no
@2methylbutyroylcarnitine	0.0107673	7.35393	yes
X-12056	0.0120213	-8.21188	no
X-12556	0.0120926	7.42611	no
theophylline	0.0122832	7.55561	no
X-12749	0.0131992	6.94334	no
@1palmitoylglycerophosphoinositol	0.0134548	7.76953	no
mannose	0.0149191	6.88004	yes
X-14057	0.0157585	7.70477	no
X-12093	0.0158293	7.98457	no
oleate181n9	0.0164076	6.7826	yes
@2aminobutyrate	0.0184051	-6.66337	no
hypoxanthine	0.0185113	-6.7242	yes
cortisone	0.0189555	6.39844	yes
X-12830	0.0204278	6.88135	no
ADpSGEGDFXAEGGGVR	0.020471	-6.5514	yes
alphaketoglutarate	0.0222043	8.7174	no
@1stearoylglycerophosphoinositol	0.0224314	6.51507	no
@10nonadecenoate191n9	0.0226956	6.44133	yes
hydroxyisovaleroylcarnitine	0.0228109	6.55649	no
X-04498	0.0229181	7.14881	no
caprate100	0.0232631	6.41476	yes
X-06227	0.023824	6.5786	no
dodecanedioate	0.0242215	-8.48893	no
aspartylphenylalanine	0.0244882	6.40952	no
Nacetylalanine	0.0245942	6.37413	no
docosapentaenoaten3DPA225n3	0.0249981	6.33686	yes
X-14541	0.0262478	9.14687	no
X-12029	0.0271562	-6.84508	no
X-12844	0.0279663	6.26352	no
valerate	0.028848	6.53102	no
glycylvaline	0.030532	7.91027	no
X-12095	0.0316764	6.13133	yes
@7methylxanthine	0.0321638	-6.89843	no
X-03088	0.032856	-5.88754	no
X-12544	0.0344001	-6.03993	no
X-12405	0.037133	6.11671	no
X-12092	0.0384317	5.84566	no
paraxanthine	0.0387358	6.21137	no
X-11540	0.0397994	5.83476	yes
HWESASXX	0.040945	-5.58037	yes
@1linoleoylglycerophosphocholine	0.041672	-5.76753	yes
serotonin5HT	0.0421918	-5.71624	yes
X-11438	0.0431512	-5.94892	no
aspartate	0.0438024	5.84919	no
X-14977	0.0455386	6.12099	no
hippurate	0.0481959	-5.58763	yes
@1linoleoylglycerophosphoethanolamine	0.0508343	5.52343	no
acetylcarnitine	0.0515667	5.5061	yes
X-13429	0.0517608	6.85998	no
mannitol	0.0523924	5.66544	no
betahydroxyisovalerate	0.0526466	5.55886	no
threonine	0.0527127	-5.32415	no
N1methyladenosine	0.0527922	5.47757	yes
@4acetamidobutanoate	0.0531663	5.35964	yes
@2linoleoylglycerophosphocholine	0.0531724	-5.61774	no
X-10510	0.05417	-5.44613	no
X-09789	0.0554491	5.42513	no
@1heptadecanoylglycerophosphocholine	0.0574693	5.44296	no
X-14625	0.0594441	5.33164	no
biliverdin	0.0611876	-6.42642	no
X-11452	0.0613711	5.39087	no
pyroglutamine	0.0655178	-5.20978	no
@1eicosadienoylglycerophosphocholine	0.066769	5.45744	no
cystine	0.0668777	5.71934	no
pentadecanoate150	0.0693793	5.26452	no
androsteronesulfate	0.0697842	-5.14377	yes
linoleamide182n6	0.0747818	-5.0407	no
X-11445	0.075	-5.21473	no
pcresolsulfate	0.0762137	-5.01612	no
@2hydroxyisobutyrate	0.0764763	5.20295	no
citrate	0.077311	-5.00265	yes
X-10506	0.0815408	4.94059	no
ursodeoxycholate	0.0845544	6.70229	no
X-04499	0.0848463	5.19494	no
X-12094	0.0891756	4.85081	yes
X-11521	0.0897686	4.79097	no
X-11793	0.0904671	-4.45756	yes
levulinate4oxovalerate	0.0911515	6.23514	no
X-14588	0.091678	-4.77197	no
X-11247	0.0942207	-4.60838	no
tryptophan	0.0985186	4.67446	yes
@2oleoylglycerophosphocholine	0.101107	4.66308	no
X-12442	0.103301	-4.60944	yes
X-08988	0.103702	-4.60409	no
X-11843	0.105541	5.02417	no
myoinositol	0.106016	4.57359	no
X-03056	0.112566	4.48999	yes
X-13548	0.123698	4.35629	no
hexadecanedioate	0.130089	-5.26533	no
X-13183	0.131007	4.27851	no
@5oxoproline	0.133203	-4.24937	no
palmitoleate161n7	0.138676	4.19046	yes
@17dimethylurate	0.140612	6.1115	no
Cglycosyltryptophan	0.140748	4.16862	yes
X-14086	0.148562	-4.14218	no
@15anhydroglucitol15AG	0.152598	-4.05728	no
X-12855	0.153417	5.24833	no
catecholsulfate	0.167921	-3.9027	no
X-11799	0.171463	-3.95351	no
X-14745	0.171887	4.21792	yes
X-11421	0.172937	-3.85722	no
glycerol3phosphateG3P	0.175896	-3.83086	no
X-14304	0.18123	-4.29429	yes
X-12230	0.182395	-4.39668	no
X-09706	0.187128	-3.74416	no
X-11485	0.188085	4.02637	no
docosahexaenoateDHA226n3	0.19463	3.67115	no
thromboxaneB2	0.198036	3.71136	no
@4vinylphenolsulfate	0.20332	3.67097	no
thymolsulfate	0.204545	4.43284	no
X-12236	0.208156	4.27876	no
X-12231	0.222001	3.62279	no
isobutyrylcarnitine	0.223882	3.44288	no
X-13549	0.22757	-3.42041	no
X-14662	0.229016	4.96969	no
malate	0.233748	3.61803	no
X-12719	0.235724	3.98156	no
phosphate	0.236852	-3.34849	no
isovalerate	0.238142	3.36045	no
X-12428	0.240062	-3.82304	yes
@2hydroxypalmitate	0.242208	-3.31058	no
X-12217	0.247451	3.36406	no
X-11261	0.248053	3.29142	no
X-13431	0.249559	-3.38873	no
X-11497	0.250793	3.25102	yes
X-12850	0.253557	-3.96056	no
X-09026	0.255716	3.22158	no
stearidonate184n3	0.261854	3.18921	yes
X-08402	0.270818	3.12647	no
X-12039	0.284473	-3.31406	no
X-11334	0.284853	2.92706	no
X-14189	0.285564	-3.07974	no
X-09108	0.287194	-3.26905	no
phenylacetylglutamine	0.291323	2.9874	no
X-12771	0.291385	3.7481	no
eicosenoate201n9or11	0.29304	2.97679	yes
X-12798	0.294711	3.0473	yes
X-10500	0.297198	-2.95129	no
linoleate182n6	0.297288	2.95074	yes
X-13435	0.298649	-2.995	no
creatinine	0.299738	2.93583	no
bilirubinEZorZE	0.305354	-3.07397	no
X-11423	0.306146	2.88936	no
X-12776	0.310892	-2.86894	no
ornithine	0.312331	-2.86043	no
Nacetylthreonine	0.316768	3.18407	yes
oleamide	0.318526	2.82407	no
erythrose	0.321115	3.09999	no
X-12680	0.321351	-3.37315	no
X-14658	0.321718	-3.74308	no
X-13553	0.330192	2.98993	no
scylloinositol	0.332463	-3.08218	no
X-11537	0.340774	2.70848	no
glutaroylcarnitine	0.342836	2.58896	no
X-11845	0.347117	3.13724	no
@1oleoylglycerophosphocholine	0.353018	2.62958	no
X-12206	0.354818	2.63581	no
linolenatealphaorgamma183n3or6	0.354849	2.6196	yes
ADSGEGDFXAEGGGVR	0.357551	2.60494	yes
X-10675	0.358546	3.34086	no
X-11255	0.36288	2.71577	no
pyridoxate	0.365372	2.5803	no
uridine	0.376898	-2.50189	no
X-12465	0.377402	2.76882	yes
X-11880	0.379016	-2.51004	no
X-12704	0.382117	3.20994	no
xanthine	0.38509	2.45924	no
X-12212	0.385592	2.82589	no
citrulline	0.387566	-2.44962	no
X-13496	0.391204	2.50617	no
acetylphosphate	0.391284	-2.42736	no
X-13859	0.392348	2.49219	no
@3hydroxy2ethylpropionate	0.401516	3.59963	no
X-13741	0.414362	2.66233	no
quinate	0.420679	-2.53816	no
X-11450	0.425824	2.25704	no
X-13372	0.426715	-2.26066	no
X-14205	0.436052	2.31977	no
@3methoxytyrosine	0.438598	-2.28368	no
ascorbateVitaminC	0.438691	2.35104	no
X-11792	0.44006	2.92685	no
X-05426	0.442881	2.31355	no
@1methylurate	0.443378	-2.72923	no
X-06226	0.448818	2.15204	no
eicosapentaenoateEPA205n3	0.451958	-2.1298	no
stachydrine	0.45427	-2.11894	no
X-13215	0.454523	-2.7386	no
@1methylxanthine	0.455735	-2.71631	no
X-14374	0.46418	2.12737	no
X-11818	0.468954	2.16634	no
taurolithocholate3sulfate	0.474328	-2.09733	no
laurylcarnitine	0.474604	2.03453	yes
X-10429	0.48164	2.21796	no
tiglylcarnitine	0.482087	2.27304	no
methionine	0.486388	-1.97104	yes
X-11470	0.48903	-2.08131	yes
arabinose	0.49903	2.66316	no
gammaglutamylthreonine	0.511851	1.81797	no
Nacetylornithine	0.534121	-1.76238	no
X-05907	0.53537	1.76475	no
X-11440	0.549081	1.70231	no
X-11568	0.54969	2.17466	no
X-11491	0.550259	-1.98631	no
@1arachidonoylglycerophosphocholine	0.550912	1.77202	no
bilirubinEE	0.556547	-1.66505	yes
@2linoleoylglycerophosphoethanolamine	0.567339	2.10124	no
X-02973	0.575065	1.59439	no
X-06307	0.58816	1.59715	no
X-11852	0.600087	-2.01399	no
X-13619	0.600874	-1.48149	no
heme	0.604821	-1.5123	no
X-05491	0.609336	-1.63426	no
indoleacetate	0.636581	1.34527	no
prohydroxypro	0.643091	-1.31396	no
X-06351	0.655004	1.73207	no
@3methylxanthine	0.666924	-1.46932	no
glycocholate	0.668308	-1.62374	no
taurochenodeoxycholate	0.676628	-1.57142	no
X-11550	0.680232	1.1672	no
glycerate	0.680699	1.17161	no
arachidonate204n6	0.689255	-1.13243	no
laurate120	0.69086	-1.12626	yes
X-11552	0.695678	1.21966	no
@7methylguanine	0.696633	1.12557	no
X-11529	0.703423	1.42487	no
X-11546	0.704424	-1.40818	no
X-13069	0.707819	-1.13167	yes
@1docosahexaenoylglycerophosphocholine	0.70852	1.05874	no
X-04495	0.722244	1.04111	no
X-11374	0.726254	0.972622	no
myristoleate141n5	0.726672	-0.989959	yes
cysteine	0.730109	0.978802	no
X-11319	0.741093	0.938083	yes
dehydroisoandrosteronesulfateDHEAS	0.746652	-0.914919	no
X-10395	0.752798	0.891967	no
arabitol	0.761962	0.857852	no
X-06126	0.763747	0.849903	no
X-12734	0.772958	-1.23625	no
phenyllactatePLA	0.788447	1.00077	no
X-14626	0.790978	0.935681	no
trans4hydroxyproline	0.79393	-0.739776	no
X-11381	0.794577	-0.740102	no
X-02249	0.797036	-0.728376	no
X-11876	0.798438	0.914061	no
X-12816	0.803658	-0.768639	no
choline	0.804325	0.701666	no
decanoylcarnitine	0.816414	-0.657501	no
X-06267	0.81963	-0.673448	yes
X-12443	0.829127	-0.813799	no
undecanoate110	0.829911	0.612053	no
leucylleucine	0.832422	-0.76961	no
X-11849	0.839127	0.586124	no
X-12216	0.853154	-0.584411	no
@3carboxy4methyl5propyl2furanpropanoateCMPF	0.856741	-0.513566	no
theobromine	0.867345	0.478191	no
X-11847	0.874707	0.455022	no
@2tetradecenoylcarnitine	0.875228	-0.461548	yes
glycochenodeoxycholate	0.879593	0.460841	no
X-12696	0.884563	-0.415791	no
gammaglutamylmethionine	0.885751	-0.464515	no
cholate	0.890309	-0.490844	no
X-03090	0.892363	0.422218	no
nonadecanoate190	0.897568	0.365611	yes
urea	0.903966	-0.341706	no
homostachydrine	0.908652	0.33874	no
X-11795	0.913836	-0.306445	no
@2hydroxystearate	0.91462	-0.30249	no
X-11422	0.915914	0.299026	no
X-11850	0.93264	-0.241005	no
X-12717	0.932698	-0.290525	no
N2N2dimethylguanosine	0.93711	0.295746	no
X-11443	0.940387	-0.215374	no
octanoylcarnitine	0.941313	-0.208504	no
cortisol	0.945674	-0.19337	yes
glycerol2phosphate	0.954572	-0.215826	no
octadecanedioate	0.963236	-0.142708	no
pipecolate	0.971844	0.0999618	no
X-12253	0.980574	0.0686224	no
fructose	0.985835	0.050281	no
X-11437	0.994389	-0.0223408	no

## Sheet: TG mRNAs
mRNA	p-value	beta	mRNA in BMTI?
HDC	3.99247e-85	-48.6709	yes
SLC45A3	1.67067e-66	-44.0928	yes
GATA2	4.70545e-61	-42.5435	yes
C1ORF186	8.07129e-48	-38.2589	yes
CPA3	1.24045e-47	-38.1923	yes
MS4A2	3.21582e-44	-36.9376	yes
ABCG1	6.57947e-37	-33.9926	yes
ATP5EP2	4.53061e-31	31.3312	yes
RNF24	1.33546e-30	-31.1028	yes
COX7C	1.70844e-30	31.0504	yes
ENPP3	5.24699e-30	-30.8103	yes
FCER1A	3.72883e-29	-30.3843	yes
ATP5L	2.17123e-28	29.9945	yes
CSF3R	1.21649e-27	-29.6064	no
MXD1	1.98908e-27	-29.4945	yes
ABCA1	2.71494e-27	-29.4233	yes
RPL26	1.94949e-26	28.9669	yes
RPS27L	4.97812e-26	28.7465	yes
PFDN5	6.29703e-26	28.6909	yes
RPS24	9.57844e-26	28.5913	yes
RPL21	1.46655e-25	28.4897	yes
SLIRP	3.3476e-25	28.2914	yes
ATP5I	4.389e-25	28.226	yes
C14ORF2	5.04087e-25	28.1924	yes
MBOAT7	5.93764e-25	-28.1527	yes
MRPS18C	8.17521e-25	28.0749	yes
PPP1R15A	8.48477e-25	-28.0658	no
TOMM7	1.22315e-24	27.9764	yes
TMEM126A	1.32289e-24	27.9572	no
GTF2H5	2.5749e-24	27.7934	yes
RAB11FIP1	2.70662e-24	-27.7811	yes
STK40	5.61658e-24	-27.5999	no
HSPE1	8.3427e-24	27.5011	yes
XPO6	1.7172e-23	-27.3196	yes
CACNG6	3.43621e-23	-27.1437	yes
AQP9	4.07253e-23	-27.1004	yes
FRAT2	6.30784e-23	-26.9885	no
RPS21	6.49367e-23	26.981	yes
MME	6.7928e-23	-26.9694	yes
NDUFB3	1.28998e-22	26.8042	yes
UQCRH	1.51707e-22	26.7622	yes
COMMD6	1.53338e-22	26.7594	yes
DBI	2.15098e-22	26.6715	yes
COX7A2	2.70809e-22	26.6114	yes
RPL31	3.00459e-22	26.5843	yes
RWDD1	3.30576e-22	26.5593	yes
NDUFS4	3.71755e-22	26.5285	yes
ATP5J	5.10923e-22	26.445	yes
RPL35A	5.22866e-22	26.4389	yes
UQCRQ	5.86172e-22	26.4088	yes
CXCR1	7.6045e-22	-26.3401	no
LSM1	1.17847e-21	26.2239	no
ATP5J2	1.24574e-21	26.2092	yes
SHFM1	1.38984e-21	26.18	yes
MMP25	1.55475e-21	-26.1501	yes
DPEP2	1.71241e-21	-26.1243	yes
RPL11	1.86851e-21	26.101	yes
ALOX5AP	2.31307e-21	-26.0438	no
LOC401397	2.33724e-21	26.041	yes
GAB2	2.49895e-21	-26.0231	yes
RPL34	3.15952e-21	25.96	yes
ATP6V0B	3.17113e-21	-25.959	yes
FPR1	3.31945e-21	-25.9467	yes
RPS15A	3.56321e-21	25.9276	yes
NDUFAF2	4.10854e-21	25.8891	no
KLF6	4.61454e-21	-25.8577	no
MBD6	4.93624e-21	-25.8395	no
MRPS33	6.66868e-21	25.7578	no
RPL30	7.35988e-21	25.731	yes
ZDHHC18	9.2898e-21	-25.6675	yes
TMEM140	1.04365e-20	-25.6356	yes
SNRPD2	1.21931e-20	25.593	yes
LITAF	1.60137e-20	-25.5182	no
NDUFB2	2.00081e-20	25.4568	yes
HSPB11	2.13656e-20	25.4387	no
RPL26L1	2.32558e-20	25.4153	yes
PFKFB4	2.56154e-20	-25.3885	yes
NINJ1	3.36148e-20	-25.3131	no
RPL17	4.39326e-20	25.2386	no
TCTEX1D2	5.58453e-20	25.1716	no
MRPL21	5.74777e-20	25.1635	yes
EEF1B2	6.34206e-20	25.136	no
RPL23	7.47845e-20	25.0897	no
NDUFA4	7.85524e-20	25.0759	yes
FCGRT	1.67502e-19	-24.8619	no
TNFRSF1A	1.71696e-19	-24.8549	no
BCL3	1.8214e-19	-24.8381	no
RPS27	1.88018e-19	24.8291	yes
MS4A3	1.98045e-19	-24.8143	yes
COX6C	2.87663e-19	24.7077	yes
IFITM2	3.65312e-19	-24.6392	yes
REXO2	4.4353e-19	24.5834	yes
HINT1	6.01544e-19	24.4954	yes
ENY2	6.08663e-19	24.492	no
C5AR1	6.30689e-19	-24.4817	no
BASP1	6.63543e-19	-24.467	no
PSMA4	9.74127e-19	24.3555	no
NDEL1	1.03368e-18	-24.3382	no
PILRA	1.04669e-18	-24.3346	yes
C11ORF1	1.19898e-18	24.2949	yes
RPL7	1.23193e-18	24.287	yes
ICAM3	1.24559e-18	-24.2838	no
DEF8	1.29822e-18	-24.2717	yes
RPL41	1.3049e-18	24.2702	yes
RPL24	1.32736e-18	24.2652	no
ERH	1.36235e-18	24.2576	yes
MYLIP	1.55957e-18	-24.218	no
MYO1F	1.77613e-18	-24.1798	yes
IAH1	1.99094e-18	24.1462	yes
FOS	2.14643e-18	-24.1241	yes
ADAM8	2.32164e-18	-24.1009	yes
PRKCD	2.38515e-18	-24.093	no
DUSP1	2.4173e-18	-24.089	yes
BOLA3	2.87878e-18	24.0374	yes
XKR8	3.07908e-18	-24.0175	no
MAPK3	3.26182e-18	-24.0004	yes
ZNHIT3	4.20354e-18	23.925	no
UBE2F	4.20848e-18	23.9247	yes
FFAR2	4.23483e-18	-23.9228	yes
CD52	4.25621e-18	23.9213	no
POLE4	6.19784e-18	23.8092	no
TMEM126B	6.67659e-18	23.7869	yes
CEBPD	9.59411e-18	-23.6779	yes
ATG16L2	1.76844e-17	-23.4928	yes
MAST3	1.78405e-17	-23.4902	no
ARAP3	1.85223e-17	-23.4787	no
RBX1	2.15253e-17	23.433	yes
MIDN	2.20374e-17	-23.4258	no
ZNF585A	2.24361e-17	23.4203	yes
SLC16A5	2.51494e-17	-23.3854	yes
CXCR2	2.74461e-17	-23.3587	no
MAP1LC3A	3.20918e-17	-23.3108	no
COMMD3	3.35149e-17	23.2974	no
RPL12	3.43941e-17	23.2895	yes
TEX101	3.69376e-17	-23.2675	yes
TSEN34	3.92533e-17	-23.2488	yes
SOD2	4.31015e-17	-23.22	yes
CCDC53	5.12008e-17	23.1668	no
TBCA	5.1262e-17	23.1665	no
RPL39L	5.82851e-17	23.1267	yes
SLC15A4	6.23005e-17	-23.1061	yes
C17ORF61	7.43665e-17	23.0511	yes
PTRH2	9.52108e-17	22.9741	yes
PLEKHG3	1.01013e-16	-22.9556	yes
ATG2A	1.15845e-16	-22.9127	no
TNFSF14	1.2753e-16	-22.8826	yes
EPAS1	1.30677e-16	-22.875	yes
CD3D	2.03261e-16	22.7358	no
EFHD2	2.06071e-16	-22.7315	no
DENND3	2.06379e-16	-22.731	yes
RAF1	3.82829e-16	-22.5346	no
SEMA4D	4.40282e-16	-22.4899	yes
TST	4.55579e-16	-22.479	no
KLRB1	4.59665e-16	22.4761	no
FAM129A	5.5466e-16	-22.4158	no
CKS1B	5.54732e-16	22.4158	no
BEST1	5.74202e-16	-22.4047	yes
ANAPC10	5.80636e-16	22.4011	no
PISD	6.19923e-16	-22.3801	yes
RPS7	6.63999e-16	22.3579	no
HSH2D	6.96453e-16	-22.3425	yes
SLC45A4	7.58706e-16	-22.3149	yes
PPM1F	7.88032e-16	-22.3026	yes
RPL27	8.34353e-16	22.2842	no
C8ORF59	8.60791e-16	22.2741	no
ARHGAP25	8.6855e-16	-22.2712	yes
VPS37C	8.71045e-16	-22.2702	no
MRPL14	9.44468e-16	22.244	yes
IGF2R	9.47825e-16	-22.2429	no
PNP	9.66401e-16	22.2366	yes
ACAT1	9.67437e-16	22.2362	no
MRPL42	1.08974e-15	22.1976	no
SS18L2	1.26486e-15	22.1491	no
STX3	1.28651e-15	-22.1435	yes
NCF4	1.48619e-15	-22.0964	yes
WDR61	1.53293e-15	22.0863	no
GIMAP7	1.64489e-15	22.0633	yes
ACTN1	1.70944e-15	-22.0507	no
COMMD10	1.91717e-15	22.013	no
RBM23	2.21641e-15	-21.9654	no
TIMM23	2.26609e-15	21.9581	yes
TCEB2	2.5569e-15	21.9183	yes
RNF19B	2.57192e-15	-21.9164	no
ELL	2.93494e-15	-21.8728	no
UQCRB	2.9902e-15	21.8666	yes
MRPS22	3.05706e-15	21.8593	no
FLOT2	3.48973e-15	-21.8154	no
FGD3	3.57176e-15	-21.8077	no
HIGD1A	3.59167e-15	21.8059	yes
C7ORF43	4.16508e-15	-21.7567	no
ARAP1	4.3491e-15	-21.7423	no
C15ORF39	4.35591e-15	-21.7418	no
EPHB1	4.38163e-15	-21.7398	no
CAV2	4.53733e-15	-21.7282	yes
HAUS1	5.23537e-15	21.6804	no
METTL5	7.1088e-15	21.578	no
GEMIN6	7.26485e-15	21.5707	no
SIRPA	7.31909e-15	-21.5682	no
MDH1	7.61345e-15	21.5549	no
CANT1	7.72495e-15	-21.55	no
SLC19A1	7.7269e-15	-21.5499	yes
DCTN6	8.33085e-15	21.5246	no
SORL1	8.53535e-15	-21.5164	no
PPA1	1.03573e-14	21.4511	no
TMBIM6	1.04272e-14	-21.4489	no
TXN	1.05502e-14	21.4449	yes
RARA	1.10997e-14	-21.4277	no
PSMC2	1.11089e-14	21.4274	no
RPS10	1.11472e-14	21.4263	no
DCUN1D5	1.26988e-14	21.3821	no
MNT	1.45209e-14	-21.3365	no
PHF5A	1.61494e-14	21.3003	no
LAPTM5	1.6284e-14	-21.2975	yes
RPS3A	1.73758e-14	21.2754	no
SNORD46	1.82516e-14	21.2586	yes
POLR1D	1.86027e-14	21.2521	yes
SHISA5	2.02045e-14	-21.2238	no
RPS18	2.03016e-14	21.2222	no
RPS25	2.17626e-14	21.1984	no
BTF3	2.39528e-14	21.1655	yes
TALDO1	2.44857e-14	-21.1579	no
CKS2	2.46562e-14	21.1555	no
CXCL16	2.48496e-14	-21.1529	no
NLRP12	2.5101e-14	-21.1494	yes
MPZL1	2.79247e-14	-21.1127	no
NOTCH1	2.86282e-14	-21.1042	yes
SELK	2.92714e-14	21.0965	yes
OCIAD2	3.17362e-14	21.0686	no
TMEM184B	3.24617e-14	-21.0608	yes
RPA3	3.34971e-14	21.05	yes
ARL4A	3.58126e-14	21.0269	yes
NADK	3.68699e-14	-21.0168	no
TRPM6	3.74181e-14	-21.0117	yes
HLX	3.95981e-14	-20.9921	no
KIAA0247	3.97369e-14	-20.9909	yes
EMG1	4.21407e-14	20.9705	no
SLC43A2	4.54101e-14	-20.9446	no
RAB7A	4.68956e-14	-20.9334	no
SLC44A2	4.79145e-14	-20.9259	no
MRPS21	4.90578e-14	20.9177	no
LPPR2	5.22615e-14	-20.8957	no
COMMD8	5.26219e-14	20.8933	yes
CD200R1L	5.56049e-14	-20.874	no
PRDX1	5.9542e-14	20.8502	no
TATDN1	6.93739e-14	20.7967	no
RAB35	7.21993e-14	-20.7827	no
NSA2	7.6315e-14	20.7633	no
RPL9	7.65844e-14	20.7621	yes
RSL1D1	8.03124e-14	20.7454	no
TOMM5	9.07951e-14	20.7022	no
CD97	1.04466e-13	-20.6528	no
CALML4	1.29755e-13	20.5761	no
MX2	1.30721e-13	-20.5735	yes
IFNGR2	1.3089e-13	-20.573	no
TYROBP	1.37522e-13	-20.5555	yes
C17ORF76-AS1	1.43126e-13	20.5413	no
FCGR2A	1.52419e-13	-20.5189	yes
RPF2	1.53761e-13	20.5158	no
DOCK5	1.57205e-13	-20.5079	no
OPTN	1.57579e-13	20.5071	yes
BCL6	1.60564e-13	-20.5004	yes
TKT	1.94e-13	-20.4329	no
TRANK1	2.29256e-13	-20.3732	no
S100A8	2.31178e-13	20.3702	yes
PIK3CD	2.36981e-13	-20.3613	no
TXNDC17	2.57912e-13	20.3309	yes
DPH5	2.74446e-13	20.3086	no
BRIX1	2.89767e-13	20.289	no
RPS27A	2.97981e-13	20.279	no
CRK	3.01841e-13	-20.2743	yes
PROK2	3.07671e-13	-20.2674	no
RPS14	3.33253e-13	20.2386	no
RPS6	3.39708e-13	20.2317	no
ADM	3.39825e-13	-20.2315	no
HNMT	3.40012e-13	20.2313	no
PLRG1	3.52672e-13	20.2181	no
LYN	3.64077e-13	-20.2066	no
CREB5	3.84025e-13	-20.1873	no
PANX2	3.8978e-13	-20.1819	no
GPR18	4.31498e-13	20.1451	no
CEACAM3	4.39583e-13	-20.1383	no
VAMP8	4.78061e-13	20.1078	yes
PAX7	4.93204e-13	20.0965	yes
CETN3	5.14124e-13	20.0813	no
CMIP	5.28611e-13	-20.0712	no
TAGLN2	5.65108e-13	-20.0469	no
DHX34	5.76215e-13	-20.0397	no
ZMAT2	5.86868e-13	20.0331	yes
PTAFR	6.04199e-13	-20.0224	no
UCHL3	6.37739e-13	20.0027	no
SNORD56	6.45244e-13	19.9984	yes
HDDC2	6.90503e-13	19.9736	no
CLECL1	6.9227e-13	19.9726	no
VNN3	7.29647e-13	-19.9533	yes
MYL6	7.3006e-13	19.9531	yes
GNL3	7.52261e-13	19.9421	no
ULK1	7.95976e-13	-19.9214	no
JARID2	8.01157e-13	-19.919	no
CHST15	8.06635e-13	-19.9165	no
C6ORF48	8.1813e-13	19.9113	no
FRAT1	8.30599e-13	-19.9057	no
CCNA1	8.31394e-13	-19.9054	yes
SYTL3	8.6184e-13	-19.8921	yes
ARHGEF40	9.06128e-13	-19.8737	no
CYTH4	9.27714e-13	-19.865	no
MKNK2	9.78012e-13	-19.8455	no
EIF3E	1.00848e-12	19.8342	no
S1PR4	1.06534e-12	-19.8139	no
EPB41L4A-AS1	1.06927e-12	19.8126	no
CCT2	1.07904e-12	19.8092	no
SLCO3A1	1.08021e-12	-19.8088	no
UFC1	1.10446e-12	19.8006	yes
ALOX5	1.10858e-12	-19.7992	no
SSH2	1.1609e-12	-19.7821	no
CCDC167	1.19054e-12	19.7728	no
PIAS1	1.20045e-12	-19.7697	no
C1RL	1.21766e-12	-19.7644	yes
TIMP2	1.30952e-12	-19.7374	no
FAM53C	1.34014e-12	-19.7289	no
FAM65B	1.35814e-12	-19.7239	no
ACTN4	1.37758e-12	-19.7186	no
HCK	1.44791e-12	-19.7001	yes
ZNF467	1.48573e-12	-19.6905	no
SSB	1.49316e-12	19.6886	no
NDUFB5	1.5214e-12	19.6817	no
COPS5	1.58498e-12	19.6664	no
IL17RA	1.60328e-12	-19.6621	yes
BANP	1.61404e-12	-19.6596	no
CTDSP2	1.69772e-12	-19.6408	yes
UQCRHL	1.80669e-12	19.6175	no
ITGA5	1.85283e-12	-19.6081	no
SEMA4A	2.01246e-12	-19.5771	no
MOB3A	2.12764e-12	-19.5563	no
PHC2	2.15715e-12	-19.5511	yes
NECAB2	2.26227e-12	-19.5332	no
FAM96A	2.28402e-12	19.5296	no
RNF7	2.2959e-12	19.5277	no
CD300A	2.29821e-12	-19.5273	yes
S100A11	2.36565e-12	-19.5164	no
APOBR	2.46162e-12	-19.5015	no
GYPB	2.52829e-12	19.4914	yes
RFESD	2.53189e-12	19.4909	no
HRSP12	2.63808e-12	19.4754	no
LSM7	2.6738e-12	19.4703	no
RPL13AP6	2.69379e-12	19.4675	no
EEF1E1	3.02701e-12	19.4235	no
KRT23	3.14208e-12	-19.4094	yes
P2RY13	3.20961e-12	-19.4013	no
TMCO1	3.28834e-12	19.3922	no
GNAI2	3.48901e-12	-19.3697	no
C11ORF10	3.88705e-12	19.3287	yes
AHSP	4.46e-12	19.2764	yes
ZBTB34	4.70359e-12	-19.2561	no
CA1	4.75156e-12	19.2522	yes
EIF3H	5.01667e-12	19.2315	no
C11ORF74	5.26232e-12	19.2132	no
RPL35	5.66896e-12	19.1847	no
NAA20	5.88852e-12	19.1701	no
ANPEP	6.01662e-12	-19.1619	no
PRSS3	6.04936e-12	-19.1598	yes
CSF2RB	6.13835e-12	-19.1542	no
FBL	6.90512e-12	19.1089	yes
PRKCB	7.48316e-12	-19.078	no
CCDC90B	7.59694e-12	19.0721	no
ZNF746	7.88836e-12	-19.0576	no
NCF1C	8.34152e-12	-19.036	no
CA8	8.6785e-12	-19.0207	no
ITPRIP	9.4758e-12	-18.9867	no
REM2	9.52673e-12	-18.9846	yes
ARID3A	9.98132e-12	-18.9665	no
VMP1	1.00898e-11	-18.9623	no
STAT3	1.04598e-11	-18.9484	no
TYK2	1.17376e-11	-18.9035	no
PLAUR	1.20732e-11	-18.8926	no
CCDC56	1.23864e-11	18.8826	no
ALPK1	1.26202e-11	-18.8753	no
CCDC15	1.29506e-11	18.8652	no
PLEKHO2	1.36163e-11	-18.8456	no
CMAS	1.38169e-11	18.8399	no
NEU1	1.44648e-11	-18.822	yes
NAE1	1.45933e-11	18.8185	no
NFU1	1.50354e-11	18.8068	no
PSMA3	1.52492e-11	18.8013	no
PRKCZ	1.56531e-11	-18.791	no
DAPK2	1.63982e-11	-18.7728	no
C1ORF54	1.65874e-11	18.7683	no
RPL6	1.67027e-11	18.7656	no
ASPRV1	1.82911e-11	-18.7299	yes
MRPL30	1.88298e-11	18.7185	no
TP53INP2	1.90683e-11	-18.7135	no
TRIOBP	2.02049e-11	-18.6907	no
COQ5	2.12904e-11	18.67	no
ATP6V1B2	2.15833e-11	-18.6646	no
SLC12A9	2.17249e-11	-18.6621	no
DRG1	2.18389e-11	18.66	no
EAF2	2.22629e-11	18.6524	no
RPS29	2.24434e-11	18.6492	no
PARL	2.24977e-11	18.6483	no
ITM2B	2.28776e-11	-18.6416	no
DGCR2	2.33075e-11	-18.6343	no
RPL5	2.40005e-11	18.6227	no
IQSEC1	2.48438e-11	-18.609	no
FAM212B	2.51073e-11	-18.6048	no
FAM172A	2.72276e-11	18.5727	no
MANSC1	2.77621e-11	-18.5649	yes
APBB1IP	2.95442e-11	-18.5402	no
ROMO1	3.06582e-11	18.5255	no
CELF2	3.11596e-11	-18.519	yes
RPIA	3.18074e-11	18.5108	yes
TBC1D14	3.49422e-11	-18.4733	no
TNFAIP2	3.50296e-11	-18.4723	no
MKI67IP	3.51615e-11	18.4708	no
GYPE	3.56742e-11	18.465	yes
TRIM8	3.77113e-11	-18.4428	no
ATP5H	4.0356e-11	18.4157	yes
DPEP3	4.07367e-11	-18.4119	no
SLC11A1	4.16503e-11	-18.403	no
C2ORF55	4.1952e-11	-18.4002	no
HMGXB4	4.3955e-11	18.3814	yes
SERTAD1	4.55534e-11	-18.3671	no
MNDA	4.5678e-11	-18.366	no
FAM174A	4.74343e-11	-18.3508	no
TAP1	4.92072e-11	-18.3361	yes
SLC16A3	4.9415e-11	-18.3344	no
CDA	5.20967e-11	-18.3131	no
ASF1B	5.25274e-11	-18.3097	no
ZNF22	5.26558e-11	18.3088	no
EPN1	5.40475e-11	-18.2982	no
RAB37	5.68001e-11	-18.2782	no
PSD4	5.94185e-11	-18.26	no
LINC00239	5.99795e-11	18.2562	no
ZSWIM4	6.03603e-11	-18.2536	no
FAM46C	6.0476e-11	18.2528	yes
LPAR2	6.14073e-11	-18.2466	yes
BPGM	6.45834e-11	18.2262	yes
REXO1	6.52795e-11	-18.2219	no
GZMA	6.65934e-11	18.2138	no
TMUB2	6.83383e-11	-18.2033	yes
DUSP18	6.92048e-11	-18.1982	yes
RPS6KA5	7.15198e-11	-18.1848	no
DDX1	7.54505e-11	18.1631	yes
HCAR3	7.78015e-11	-18.1506	no
ARHGAP9	7.8752e-11	-18.1457	no
MRPS23	7.90442e-11	18.1441	no
GLIPR2	8.38872e-11	-18.1199	no
KLHL21	8.50914e-11	-18.1141	no
PLIN4	8.99212e-11	-18.0916	no
NCF1	9.5857e-11	-18.0654	no
AKNA	1.0236e-10	-18.0386	no
LTBR	1.05922e-10	-18.0245	yes
EMR3	1.06681e-10	-18.0216	no
MAP3K3	1.06936e-10	-18.0206	no
GTF3A	1.07228e-10	18.0195	no
SULF2	1.07666e-10	-18.0178	no
VPS29	1.09311e-10	18.0116	no
PLEKHM1	1.12912e-10	-17.9983	no
ZNFX1	1.32242e-10	-17.9333	no
BTNL8	1.35217e-10	-17.9241	no
EXOSC1	1.36742e-10	17.9195	no
C1ORF150	1.3741e-10	-17.9174	no
CALCOCO1	1.38428e-10	-17.9144	no
METAP2	1.39088e-10	17.9124	no
PELI2	1.49521e-10	-17.8825	no
GEMIN2	1.49626e-10	17.8823	no
IP6K1	1.50793e-10	-17.879	no
SNX11	1.51577e-10	-17.8769	no
ERGIC1	1.54515e-10	-17.8689	no
LOC399744	1.68695e-10	-17.8326	no
NAA38	1.74879e-10	17.8176	no
FAM165B	1.76069e-10	17.8148	no
CAMK1D	1.91854e-10	-17.7791	no
RAB31	1.93388e-10	-17.7758	no
SSH3	2.03385e-10	-17.7548	no
TMEM115	2.07167e-10	-17.7471	no
HCAR2	2.1133e-10	-17.7388	no
RBCK1	2.35144e-10	-17.6942	no
ST3GAL2	2.58978e-10	-17.6538	no
KDM6B	2.60456e-10	-17.6514	no
CYBA	2.60983e-10	-17.6505	no
AKAP7	2.67174e-10	17.6407	no
EXTL3	2.72306e-10	-17.6327	no
CDC42EP2	2.92056e-10	-17.6033	no
RSL24D1	2.99326e-10	17.5929	no
ITGB2	3.03002e-10	-17.5878	no
AMICA1	3.03077e-10	-17.5877	no
ABTB1	3.05253e-10	-17.5847	no
MTERFD1	3.15333e-10	17.571	no
CDK19	3.15836e-10	-17.5703	no
ATP6V0A1	3.26828e-10	-17.5559	no
MAP3K11	3.3065e-10	-17.551	no
PELI1	3.37988e-10	-17.5417	no
PTPRE	3.44777e-10	-17.5333	yes
ALPL	3.49895e-10	-17.5271	yes
TCEB1	3.56919e-10	17.5187	no
CISD1	3.58139e-10	17.5172	no
NUMB	3.74891e-10	-17.4979	no
TCF20	3.9109e-10	-17.48	no
ALDOA	3.93975e-10	-17.4769	no
FAM100B	4.09162e-10	-17.4608	yes
ZNF277	4.16e-10	17.4538	no
POMP	4.17315e-10	17.4525	no
C10ORF54	4.18813e-10	-17.4509	no
TPD52L2	4.2955e-10	-17.4402	yes
CASP9	4.35859e-10	-17.434	yes
RGS10	4.50106e-10	17.4203	yes
CTSS	4.75907e-10	-17.3966	no
RABGGTB	4.87846e-10	17.386	no
MYL4	5.04355e-10	17.3718	yes
DAZAP2	5.37253e-10	-17.3448	no
TMEM14C	5.72428e-10	17.3177	no
QPCT	5.72442e-10	-17.3177	no
CSRNP1	5.8084e-10	-17.3115	no
ROPN1L	5.83663e-10	-17.3094	yes
MGRN1	5.97303e-10	-17.2995	no
CAP1	6.14688e-10	-17.2872	no
FCGR3B	6.30346e-10	-17.2764	no
ANXA1	6.47681e-10	17.2648	no
C17ORF48	6.53105e-10	17.2612	no
HCG27	7.12442e-10	-17.2238	no
RNF14	7.26717e-10	17.2152	no
PLAC8	7.31889e-10	17.2122	no
LASP1	7.55607e-10	-17.1984	no
RNASET2	7.5958e-10	-17.1962	no
DPF2	7.72587e-10	-17.1888	no
TREML2	7.78517e-10	-17.1855	no
SH2B2	8.18966e-10	-17.1637	no
ZNF32	8.2293e-10	17.1616	no
TMEM154	8.2322e-10	-17.1614	no
PREPL	8.40012e-10	17.1527	no
OPRL1	8.67795e-10	-17.1386	yes
GLRX3	9.03684e-10	17.1211	no
YIPF3	9.13029e-10	-17.1166	no
PSMA2	9.29401e-10	17.1089	no
NUAK2	9.32599e-10	-17.1074	no
RGL2	9.39117e-10	-17.1044	no
C1QBP	9.53905e-10	17.0976	no
CD3G	9.9107e-10	17.081	no
PLCB2	1.01925e-09	-17.0689	no
NUP37	1.03385e-09	17.0627	no
GIT2	1.05209e-09	-17.0551	no
FBXW8	1.12657e-09	17.0253	yes
MMP9	1.13021e-09	-17.0239	no
SELPLG	1.1307e-09	-17.0237	no
RPS13	1.26664e-09	16.9741	no
ENOPH1	1.29325e-09	16.965	no
TRIAP1	1.29424e-09	16.9647	no
TPST1	1.31409e-09	-16.958	no
RAB2B	1.33091e-09	16.9525	yes
RHAG	1.33703e-09	16.9504	no
PNKP	1.35082e-09	-16.946	no
SBNO2	1.38753e-09	-16.9342	no
SLC6A6	1.43942e-09	-16.9181	yes
IFIT1B	1.48376e-09	16.9048	yes
EGLN2	1.56472e-09	-16.8814	no
TIAM2	1.60135e-09	-16.8713	no
FECH	1.60946e-09	16.869	yes
SNX27	1.63568e-09	-16.8619	no
DYNLL1	1.65908e-09	16.8557	no
SLC15A3	1.67077e-09	-16.8526	no
CBX3	1.69031e-09	16.8474	no
ZMIZ1	1.72748e-09	-16.8379	no
FES	1.73122e-09	-16.8369	no
TMEM91	1.7431e-09	-16.8339	no
ZFAND3	1.75612e-09	-16.8306	no
WLS	1.76419e-09	-16.8286	no
MYO9B	1.79302e-09	-16.8214	no
TMEM127	1.81472e-09	-16.8161	no
CTBS	1.82217e-09	-16.8143	no
PDCD10	1.90795e-09	16.794	yes
CCDC59	1.92012e-09	16.7912	no
ATP5S	2.07631e-09	16.7565	no
GLRX	2.11038e-09	16.7493	no
PRR13	2.21032e-09	-16.7288	no
GNB2	2.24966e-09	-16.7209	no
AKIRIN2	2.25581e-09	-16.7197	no
TCN1	2.27801e-09	-16.7154	yes
CABIN1	2.30571e-09	-16.71	yes
TBXAS1	2.33772e-09	-16.7039	no
LPAR6	2.35491e-09	16.7006	no
RASSF2	2.44943e-09	-16.6831	no
CBX4	2.46559e-09	-16.6802	no
PREX1	2.47072e-09	-16.6793	no
RUNDC1	2.51655e-09	-16.6711	no
ITPK1	2.53575e-09	-16.6677	no
LRWD1	2.54715e-09	-16.6657	no
PSMC6	2.56343e-09	16.6628	no
ZNF816	2.72388e-09	16.6357	no
MEGF9	2.73525e-09	-16.6339	no
HBP1	2.89186e-09	-16.609	yes
RARS2	2.99003e-09	16.594	no
MPPE1	2.99042e-09	-16.594	no
SAR1B	3.22562e-09	16.56	yes
ZYX	3.30858e-09	-16.5486	no
BSDC1	3.36855e-09	-16.5406	no
KIAA1143	3.39333e-09	16.5373	no
N4BP1	3.42012e-09	-16.5337	no
TRIM48	3.44872e-09	-16.53	no
KCTD13	3.74229e-09	-16.4932	no
CLNS1A	3.86084e-09	16.4792	no
DPCD	3.883e-09	16.4766	yes
TMEM43	3.93043e-09	-16.4711	no
ST3GAL4	3.98625e-09	-16.4647	no
ELMO1	4.08277e-09	-16.4539	no
TMEM9B	4.20159e-09	16.441	no
ASUN	4.22212e-09	16.4388	no
ADAM19	4.39031e-09	-16.4211	no
LINC00173	4.43012e-09	-16.417	yes
SLC35A1	4.45355e-09	16.4146	no
ACTR6	4.65658e-09	16.3944	no
THOC5	4.85981e-09	-16.375	no
PDE4B	5.22492e-09	-16.3421	no
GAST	5.32402e-09	-16.3335	no
TGFA	5.35683e-09	-16.3307	no
BCKDK	5.37811e-09	-16.3289	no
C12ORF57	5.43243e-09	16.3243	no
MAP7D1	5.43406e-09	-16.3242	no
WDR33	5.5983e-09	16.3106	no
SP110	5.62993e-09	-16.3081	no
SLC9A1	5.81732e-09	-16.2931	no
TRAK2	5.8444e-09	16.291	yes
CECR6	5.89212e-09	-16.2873	no
POLR3GL	5.99064e-09	16.2797	no
VPS37B	6.00684e-09	-16.2785	no
CCDC28A	6.10472e-09	-16.2711	no
PPP1R18	6.35244e-09	-16.2529	no
SNHG5	6.40481e-09	16.2491	no
CEP19	6.54603e-09	-16.2392	no
DGAT2	6.72883e-09	-16.2265	no
NAMPT	6.84584e-09	-16.2186	no
JUNB	7.01616e-09	-16.2074	no
BTLA	7.11037e-09	16.2012	yes
APIP	7.12989e-09	16.2	no
ABHD4	7.27286e-09	-16.1909	no
RIOK2	7.33545e-09	16.1869	no
SETMAR	7.48175e-09	16.1778	no
LILRA2	7.49231e-09	-16.1772	no
ZBED5	7.61706e-09	16.1696	no
PITHD1	7.62077e-09	16.1694	yes
GPR97	7.72887e-09	-16.1629	no
MAGOH	7.78944e-09	16.1593	no
SFR1	7.87594e-09	16.1542	no
IL1RN	7.87815e-09	-16.1541	no
EEPD1	7.99097e-09	-16.1475	no
ASAP1	8.46017e-09	-16.1212	no
PPP4R1	8.46416e-09	-16.121	no
AMDHD2	8.53005e-09	-16.1174	yes
ORAI3	8.59833e-09	-16.1137	no
PRIC285	8.679e-09	-16.1094	yes
CNOT3	8.80385e-09	-16.1028	no
SRP19	9.09664e-09	16.0877	no
ATP5C1	9.09976e-09	16.0875	no
LARP7	9.2355e-09	16.0807	no
KRT86	9.24554e-09	-16.0802	yes
CD69	9.30338e-09	16.0773	no
KLHDC8B	9.36726e-09	-16.0741	no
GATAD2A	1.01141e-08	-16.0386	no
NTAN1	1.06149e-08	16.0161	no
NLRX1	1.07974e-08	-16.0082	no
EIF3M	1.09626e-08	16.0011	no
LTF	1.11112e-08	15.9949	yes
OSTC	1.16139e-08	15.9743	no
PSMB3	1.17604e-08	-15.9684	no
PLOD1	1.21061e-08	-15.9549	no
ZNF26	1.23416e-08	15.9459	no
RNF149	1.25247e-08	-15.939	no
BIN3	1.27425e-08	-15.931	yes
MAK	1.29096e-08	-15.9249	no
CCR3	1.30749e-08	-15.919	no
UBL5	1.30837e-08	15.9186	yes
PTPN4	1.32804e-08	15.9117	no
CNPY2	1.33336e-08	15.9098	no
PAK1	1.36099e-08	-15.9002	yes
CAMK2G	1.37051e-08	-15.8969	no
ST6GALNAC2	1.37234e-08	-15.8963	no
IRF2BPL	1.39419e-08	-15.8889	no
RGS14	1.47925e-08	-15.8611	no
FGR	1.54754e-08	-15.8399	no
RPL13AP3	1.57521e-08	15.8316	no
RPAIN	1.57642e-08	15.8312	no
BRK1	1.60902e-08	15.8216	no
C14ORF45	1.6287e-08	15.8159	yes
ZYG11B	1.66977e-08	-15.8041	no
NDUFS3	1.70751e-08	15.7936	no
DENND5A	1.72609e-08	-15.7885	no
DYSF	1.76018e-08	-15.7793	no
GHRL	1.77393e-08	-15.7756	yes
LYRM2	1.8761e-08	15.7491	no
KIAA0913	1.88374e-08	-15.7472	no
PFN1	1.94276e-08	-15.7326	no
BIRC3	1.96419e-08	15.7274	no
NUDT1	1.99642e-08	15.7197	no
SIPA1L2	2.02002e-08	-15.7141	no
RPS6KA1	2.04445e-08	-15.7084	no
GLRX5	2.0665e-08	15.7034	yes
ETFA	2.1171e-08	15.6919	no
2005-09-01	2.14923e-08	-15.6847	no
RXRA	2.15151e-08	-15.6842	no
NIF3L1	2.23221e-08	15.6667	no
RAB3IP	2.23768e-08	15.6656	no
MAN2A2	2.29591e-08	-15.6533	yes
PGS1	2.30616e-08	-15.6512	no
USP16	2.38753e-08	15.6347	no
PTTG1IP	2.50659e-08	-15.6115	no
STAT6	2.5116e-08	-15.6105	no
NOV	2.53957e-08	-15.6053	no
FAM46A	2.64658e-08	-15.5855	yes
CTSA	2.66207e-08	-15.5828	no
USP10	2.76692e-08	-15.5643	no
ARMC10	2.78576e-08	15.561	no
ATP6V1A	2.84409e-08	-15.5511	no
ATP6V1G1	2.86054e-08	15.5483	no
HIST2H2AC	2.93183e-08	-15.5365	yes
FABP5	2.9703e-08	15.5303	no
FCHO1	3.04474e-08	-15.5184	no
CD93	3.10956e-08	-15.5083	no
CUEDC1	3.12712e-08	-15.5056	no
DNAJA1	3.14122e-08	15.5034	yes
GTF2E2	3.16077e-08	15.5004	no
CHPF2	3.16956e-08	-15.4991	no
ITGB3BP	3.29154e-08	15.4809	no
CMTM3	3.31243e-08	-15.4779	yes
NSMCE4A	3.43004e-08	15.4611	no
RPP40	3.48671e-08	15.4532	no
ZNF324	3.57532e-08	-15.4411	no
KATNB1	3.72712e-08	-15.421	no
SNORD16	3.74438e-08	15.4187	yes
TBCEL	3.84221e-08	15.4063	no
CMTM6	3.87241e-08	-15.4025	no
UNC13D	3.91157e-08	-15.3976	no
SEC61G	3.92658e-08	15.3958	yes
OLR1	4.06367e-08	15.3791	yes
SESN3	4.08286e-08	15.3769	yes
UIMC1	4.33441e-08	-15.3478	no
RHOG	4.39797e-08	-15.3408	no
SERP2	4.40249e-08	-15.3403	no
RPS3	4.50606e-08	15.329	no
RPS20	4.75842e-08	15.3024	no
SPAG7	4.83885e-08	15.2943	yes
MITD1	4.83961e-08	15.2942	no
STK10	5.02471e-08	-15.2759	no
C6ORF130	5.09777e-08	15.2689	no
TMEM8A	5.15518e-08	-15.2634	no
TRIM21	5.264e-08	-15.2532	no
ACOT13	5.3509e-08	15.2452	no
PRR14	5.46532e-08	-15.2348	no
NR1H2	5.49454e-08	-15.2322	no
RPGRIP1	5.60503e-08	-15.2225	no
PRAM1	5.72925e-08	-15.2117	no
WDR1	5.74399e-08	-15.2105	no
OSTF1	5.86497e-08	-15.2002	no
RQCD1	6.01475e-08	15.1879	no
EEF1D	6.24471e-08	15.1694	no
IL6R	6.26389e-08	-15.1679	no
SNORD21	6.34963e-08	15.1612	no
DHTKD1	6.47969e-08	-15.1513	no
AGPAT9	6.85801e-08	-15.1233	no
B9D2	7.11738e-08	-15.105	no
CNIH	7.1808e-08	15.1006	no
RASGRP4	7.19476e-08	-15.0997	no
HGS	7.29853e-08	-15.0926	no
MAP4K2	7.38608e-08	-15.0867	no
SPA17	7.46739e-08	15.0813	no
GMEB2	7.64345e-08	-15.0698	no
CEP63	7.73334e-08	-15.064	no
ARHGDIB	7.89268e-08	-15.0539	no
WDR12	7.92397e-08	15.0519	no
PTOV1	8.12458e-08	-15.0395	no
DNAJA4	8.12493e-08	15.0395	yes
SMAP2	8.20021e-08	-15.0349	yes
TRIM25	8.22331e-08	-15.0335	no
LTB4R	8.27216e-08	-15.0306	no
CISD2	8.27671e-08	15.0303	yes
EMR2	8.42155e-08	-15.0217	no
NBEAL2	8.45868e-08	-15.0195	no
MRPL46	8.51355e-08	15.0163	no
GMIP	8.5427e-08	-15.0146	no
TAF9	8.92904e-08	14.9926	no
SIGLEC5	9.05705e-08	-14.9855	yes
FNIP1	9.27648e-08	-14.9736	no
PNRC2	9.29922e-08	14.9724	no
RALB	9.30533e-08	-14.9721	no
TM6SF1	9.30644e-08	-14.972	no
PIGP	9.46131e-08	14.9638	no
MYD88	9.46174e-08	-14.9638	no
GALK1	9.48563e-08	-14.9625	no
C7ORF23	9.53985e-08	14.9597	no
PIGF	9.60562e-08	14.9562	no
PGD	9.7036e-08	-14.9512	no
NPL	9.894e-08	-14.9415	no
SLC9A3R1	1.00087e-07	-14.9357	no
HIST1H2AC	1.00141e-07	-14.9355	no
C11ORF46	1.00706e-07	14.9327	no
COX6A1	1.02994e-07	14.9214	no
NGDN	1.05031e-07	14.9116	no
SVIL	1.06584e-07	-14.9043	no
DBN1	1.10361e-07	-14.8868	no
MTMR14	1.12529e-07	-14.8771	no
DPH3	1.14072e-07	14.8703	yes
ZDHHC12	1.19722e-07	-14.846	no
INPP5A	1.19823e-07	-14.8456	no
PTRHD1	1.2172e-07	14.8377	no
ACSS2	1.25283e-07	-14.8232	no
CBX7	1.25542e-07	-14.8221	no
RARS	1.25848e-07	14.8209	no
RPS9	1.27008e-07	14.8163	no
JUND	1.27828e-07	-14.813	no
SCAP	1.28272e-07	-14.8113	no
C12ORF35	1.29047e-07	-14.8083	no
MRPS31	1.29938e-07	14.8048	no
PAK1IP1	1.31237e-07	14.7998	no
CRISPLD2	1.33408e-07	-14.7915	no
TRAF3IP2	1.36327e-07	-14.7806	no
PTP4A3	1.38663e-07	-14.772	no
RNF44	1.38883e-07	-14.7712	no
ANKS1A	1.39249e-07	-14.7699	no
NSFL1C	1.39379e-07	-14.7694	no
MGAT1	1.40511e-07	-14.7653	no
ZFP36	1.4306e-07	-14.7562	no
RFFL	1.46503e-07	-14.7442	no
CHMP1A	1.47366e-07	-14.7412	no
GABARAPL1	1.52246e-07	-14.7247	no
PRCP	1.52785e-07	-14.7229	no
MS4A6A	1.57775e-07	14.7067	no
RNASEL	1.57973e-07	-14.706	no
ITLN1	1.58316e-07	14.7049	yes
POLR2A	1.58864e-07	-14.7032	no
SGK1	1.5943e-07	-14.7014	no
TMEM183A	1.60299e-07	14.6986	no
CAMLG	1.60423e-07	14.6982	no
CEBPG	1.61474e-07	14.6949	no
PIGT	1.61928e-07	-14.6935	no
RPL4	1.63567e-07	14.6884	no
PDCD5	1.72102e-07	14.6625	no
PPP1R3D	1.73602e-07	-14.6581	no
COMMD1	1.74952e-07	14.6541	no
ZFAND1	1.78358e-07	14.6443	no
DICER1	1.79663e-07	-14.6406	no
EIF2C4	1.80848e-07	-14.6372	no
VAV1	1.82456e-07	-14.6327	no
ABCC13	1.85106e-07	14.6254	yes
ANKRD46	1.85169e-07	14.6252	no
FAU	1.86142e-07	14.6225	no
URI1	1.8644e-07	14.6217	no
SP1	1.86599e-07	-14.6213	no
FXR1	1.90204e-07	14.6115	no
SOD1	1.93163e-07	14.6036	no
TFEB	1.93762e-07	-14.602	no
RAB5B	1.94032e-07	-14.6013	no
PPTC7	1.94202e-07	-14.6009	no
RAB8A	1.98599e-07	-14.5894	no
IL1B	2.08185e-07	-14.5653	no
HAL	2.08799e-07	-14.5638	yes
KIAA2013	2.15776e-07	-14.5469	no
S100A12	2.26237e-07	14.5226	no
NKIRAS1	2.27302e-07	14.5202	no
TECPR2	2.29375e-07	-14.5156	no
PCNP	2.34128e-07	14.505	no
MRPS15	2.36122e-07	14.5006	no
TREM1	2.37633e-07	-14.4974	no
CFLAR	2.3774e-07	-14.4971	no
SERPINI1	2.383e-07	14.4959	no
PSMB1	2.40582e-07	14.491	no
ACOX1	2.41269e-07	-14.4895	no
KIAA0226L	2.43993e-07	-14.4838	no
ASF1A	2.45608e-07	14.4804	no
CD14	2.4693e-07	-14.4776	no
TDG	2.49705e-07	14.4718	no
TLR6	2.53632e-07	-14.4638	no
ZMYND15	2.54782e-07	-14.4615	no
ACADM	2.55593e-07	14.4598	no
MTIF2	2.57083e-07	14.4568	no
MAP2K4	2.57644e-07	-14.4557	yes
ARPC3	2.77942e-07	14.4165	no
FBXO4	2.85935e-07	14.4018	no
SF3B14	2.94869e-07	14.3858	yes
TNFSF13B	2.9984e-07	-14.3772	yes
CHIC2	3.10197e-07	-14.3595	no
SREBF1	3.11135e-07	-14.358	no
GGA3	3.12644e-07	-14.3554	no
SLC9A8	3.16538e-07	-14.349	no
MVP	3.20442e-07	-14.3426	no
ALDH3B1	3.2187e-07	-14.3403	yes
CRLS1	3.29704e-07	14.3278	no
BRD3	3.31227e-07	-14.3254	no
C17ORF62	3.31703e-07	-14.3247	no
HCLS1	3.3237e-07	-14.3236	no
BRI3	3.4382e-07	-14.3059	no
PYCARD	3.47422e-07	-14.3005	no
TMEM219	3.5089e-07	-14.2953	no
WDR52	3.57895e-07	-14.285	no
XPC	3.58763e-07	-14.2837	no
PTPLA	3.60181e-07	14.2817	no
THYN1	3.60215e-07	14.2816	no
NGRN	3.65134e-07	14.2745	no
RRAGC	3.75976e-07	-14.2592	no
C20ORF43	3.96481e-07	-14.2314	no
EBNA1BP2	4.03705e-07	14.2219	no
C7ORF53	4.10259e-07	-14.2135	no
APOBEC3F	4.17469e-07	14.2043	no
H2AFZ	4.19456e-07	14.2018	no
SPATA2L	4.21552e-07	-14.1992	no
OSCAR	4.23794e-07	-14.1964	yes
CLDN5	4.25259e-07	-14.1946	no
SYK	4.32408e-07	-14.1858	no
ZBTB48	4.36364e-07	-14.181	no
ZZZ3	4.37319e-07	14.1799	no
FAM190B	4.39475e-07	14.1773	no
ACSL6	4.52867e-07	14.1615	no
KIT	4.66848e-07	-14.1455	no
DAPP1	4.73378e-07	-14.1381	no
UBC	4.76646e-07	-14.1345	no
APAF1	4.80007e-07	-14.1308	no
PIGK	4.8695e-07	14.1232	no
AKT1	5.0256e-07	-14.1065	no
TMEM120A	5.06655e-07	-14.1022	no
SNRPF	5.0669e-07	14.1022	no
PARVG	5.10979e-07	-14.0977	no
RAB5C	5.15969e-07	-14.0926	no
C19ORF53	5.28878e-07	14.0795	no
DCAF6	5.34772e-07	14.0736	no
PITPNA	5.36569e-07	-14.0718	no
PCMT1	5.42543e-07	14.0659	no
MLF2	5.47197e-07	-14.0614	no
DBNL	5.60934e-07	-14.0482	no
PPP1R11	5.6663e-07	-14.0429	no
TMEM60	5.67742e-07	14.0418	no
GNPDA2	5.68288e-07	14.0413	no
PDLIM7	5.6835e-07	-14.0413	no
UTP11L	5.6855e-07	14.0411	no
PECAM1	5.70488e-07	-14.0393	no
BNIP3L	5.71237e-07	14.0386	yes
SUCLG1	5.72144e-07	14.0377	no
ILF2	5.95044e-07	14.0168	no
RPL36AL	6.00189e-07	14.0123	no
ADSL	6.01237e-07	14.0113	no
RRP12	6.01562e-07	-14.011	no
MRPL48	6.04351e-07	14.0086	no
HIST3H2A	6.2911e-07	13.9872	no
TNFAIP8	6.63828e-07	13.9585	no
GTF2A2	6.71151e-07	13.9526	no
RPLP0	6.7821e-07	13.947	no
ACTB	6.9902e-07	-13.9308	no
ATP6V0D1	7.0787e-07	-13.9241	no
DYRK4	7.09664e-07	13.9227	no
MTHFD2	7.12843e-07	13.9203	no
CORO1A	7.3474e-07	-13.9041	no
NACC2	7.40493e-07	-13.8999	no
IFIT2	7.40621e-07	-13.8998	yes
CNN2	7.4135e-07	-13.8993	no
C1ORF53	7.60124e-07	13.8858	no
LOC400027	7.66377e-07	13.8814	no
ARHGAP30	7.74124e-07	-13.876	no
LINC00493	7.82098e-07	13.8705	no
HEMGN	7.87741e-07	13.8666	yes
KIAA0319L	7.9582e-07	-13.8612	no
COPS3	7.96751e-07	13.8605	no
IGSF6	8.03946e-07	-13.8557	no
C8ORF40	8.15594e-07	13.8479	no
GPX3	8.18822e-07	-13.8458	no
SH3BP5L	8.31033e-07	-13.8378	no
SNORD33	8.38221e-07	13.8332	no
RIN3	8.50229e-07	-13.8255	no
SERPINA1	8.65699e-07	-13.8158	no
TACC1	8.85701e-07	-13.8034	yes
NIP7	8.89193e-07	13.8013	no
ITGAX	9.06156e-07	-13.7911	no
LRRC26	9.20872e-07	-13.7823	yes
IL1R2	9.36521e-07	-13.7732	no
DNAJB6	9.57864e-07	-13.761	no
SPEN	9.69865e-07	-13.7542	no
DRAM2	9.95661e-07	13.74	no
CDKL1	9.96474e-07	13.7395	yes
FAM53B	1.02297e-06	-13.7253	no
CSNK1D	1.02422e-06	-13.7246	no
UPF1	1.02726e-06	-13.723	no
ERLEC1	1.02795e-06	13.7226	no
PIP4K2A	1.05058e-06	13.7108	yes
UQCR10	1.06338e-06	13.7042	yes
MTCH1	1.09091e-06	-13.6903	no
PTGDR2	1.10655e-06	-13.6825	no
KIAA0556	1.10722e-06	-13.6822	no
PACS1	1.11019e-06	-13.6807	no
ARFGAP3	1.11291e-06	-13.6794	no
RWDD4	1.11521e-06	13.6782	no
SETDB1	1.12381e-06	-13.674	no
GTF2B	1.14358e-06	13.6645	no
TACC3	1.19084e-06	-13.6424	no
AVPI1	1.20737e-06	-13.6348	yes
COPS4	1.24722e-06	13.6171	no
LYRM5	1.25376e-06	13.6142	no
ACTR1A	1.25648e-06	-13.613	no
CELA1	1.25786e-06	13.6124	no
APPL2	1.27069e-06	-13.6068	no
RNASE2	1.29558e-06	13.5962	no
PHLPP1	1.29876e-06	-13.5948	no
ADAT1	1.2993e-06	-13.5946	no
PPIH	1.32214e-06	13.585	no
KIAA0513	1.3236e-06	-13.5844	no
RNF130	1.34321e-06	-13.5764	no
SIPA1	1.3439e-06	-13.5761	no
RHBDD2	1.36433e-06	-13.5678	no
BNIP3	1.37422e-06	13.5638	no
PGLS	1.38511e-06	-13.5595	no
ERF	1.3898e-06	-13.5576	no
TMX4	1.39227e-06	-13.5566	no
FLII	1.41121e-06	-13.5492	no
CIDEB	1.4141e-06	-13.548	no
STXBP5	1.42871e-06	-13.5424	no
MRPL18	1.43368e-06	13.5405	no
FLJ14107	1.45067e-06	-13.534	no
UROD	1.46756e-06	13.5276	no
YOD1	1.49332e-06	13.518	no
SNRPA1	1.49668e-06	13.5167	no
PSMG1	1.4968e-06	13.5167	no
KCNJ15	1.49728e-06	-13.5165	yes
MAF	1.52433e-06	-13.5066	no
RABAC1	1.5335e-06	-13.5033	no
RAB43	1.54142e-06	-13.5005	no
NARF	1.55162e-06	-13.4968	no
ZFYVE27	1.55613e-06	-13.4952	no
GRSF1	1.57074e-06	13.49	no
PADI4	1.57457e-06	-13.4887	no
SLC31A2	1.61324e-06	-13.4753	no
ZNF410	1.66372e-06	13.4582	no
IL1RAP	1.73816e-06	-13.4339	no
KAT6A	1.75522e-06	-13.4285	no
INPP4B	1.76628e-06	13.425	no
PBXIP1	1.78328e-06	-13.4197	no
PELO	1.80313e-06	-13.4135	no
MAPK1	1.85332e-06	-13.3982	no
FOPNL	1.85737e-06	13.397	no
IL16	1.85984e-06	-13.3963	no
FAM101B	1.87085e-06	-13.393	no
RERE	1.87929e-06	-13.3905	yes
ATP10D	1.88479e-06	-13.3888	no
OAZ3	1.90249e-06	13.3836	no
RPL27A	1.913e-06	13.3805	no
TGFBR2	1.94151e-06	-13.3723	no
TUFT1	1.96526e-06	-13.3655	no
RABL3	1.97676e-06	13.3622	no
MXI1	1.97862e-06	13.3617	no
AGPS	2.02532e-06	13.3487	no
CLDN9	2.05608e-06	-13.3403	no
ZZEF1	2.05728e-06	-13.3399	no
C2ORF76	2.13594e-06	13.3189	no
HDGFRP2	2.18941e-06	13.3051	no
SFXN5	2.20062e-06	-13.3022	no
ADAP1	2.28109e-06	-13.282	no
METRNL	2.29669e-06	-13.2782	yes
SERTAD3	2.33504e-06	-13.2689	no
TLN1	2.34222e-06	-13.2672	no
FBXO8	2.35767e-06	13.2635	no
GZMK	2.41604e-06	13.2497	no
STX8	2.45579e-06	13.2405	no
ADAR	2.46607e-06	-13.2381	no
CRBN	2.49408e-06	13.2318	no
SNN	2.50879e-06	-13.2285	no
WDR36	2.52446e-06	13.225	no
DENND1C	2.5527e-06	-13.2187	no
DUSP12	2.56014e-06	13.217	no
EPHB4	2.56278e-06	-13.2164	no
SNX6	2.62454e-06	-13.203	no
FHL3	2.63074e-06	-13.2017	no
RBM5	2.63525e-06	-13.2007	no
ZSWIM1	2.6371e-06	-13.2003	no
AGPAT1	2.64304e-06	-13.199	no
SEC11C	2.71736e-06	13.1833	no
MCEE	2.74638e-06	13.1773	no
OGFR	2.75634e-06	-13.1753	no
CYB561D2	2.75991e-06	-13.1745	no
ABHD16A	2.76459e-06	-13.1736	no
CPD	2.76607e-06	-13.1733	no
RSBN1	2.77402e-06	13.1717	no
NLRP1	2.79475e-06	-13.1674	no
KDM4B	2.85777e-06	-13.1548	no
PSMB6	2.92313e-06	13.142	no
RGS19	2.93104e-06	-13.1404	no
FAM126B	2.94064e-06	-13.1386	no
NCOA1	2.94546e-06	-13.1376	no
C16ORF57	2.98891e-06	-13.1293	no
UBE2E1	3.01082e-06	13.1252	no
KBTBD8	3.02377e-06	13.1227	no
EP300	3.05855e-06	-13.1162	no
BOD1	3.07483e-06	13.1132	no
RRAGD	3.08744e-06	-13.1109	no
IPO5	3.12198e-06	13.1045	no
RAP2A	3.12918e-06	13.1032	no
SCYL1	3.15061e-06	-13.0993	no
FAR2	3.16073e-06	-13.0975	yes
RPE	3.1665e-06	13.0965	no
MARCH8	3.21281e-06	13.0882	yes
PSTPIP1	3.24692e-06	-13.0822	no
WWP1	3.41891e-06	13.0527	no
ATPIF1	3.43831e-06	13.0495	no
TMEM88	3.45468e-06	-13.0468	no
BNIP1	3.45576e-06	13.0466	no
CHMP5	3.49492e-06	13.0401	no
C16ORF93	3.49836e-06	-13.0396	no
VPS18	3.49876e-06	-13.0395	no
WASL	3.53435e-06	13.0337	no
DCUN1D4	3.55901e-06	13.0297	no
GRPEL2	3.56655e-06	13.0285	no
ARID3B	3.61188e-06	-13.0213	no
ABR	3.61416e-06	-13.0209	no
DCAF12	3.64598e-06	13.0159	yes
RFX2	3.71048e-06	-13.0058	yes
GBA	3.74429e-06	-13.0006	no
CUX1	3.75916e-06	-12.9984	no
TESK2	3.7652e-06	-12.9974	no
TSHZ3	3.84949e-06	-12.9847	no
MAML1	3.8554e-06	-12.9839	no
ANP32A-IT1	3.86407e-06	-12.9826	yes
POLR2H	3.88324e-06	12.9797	no
HDDC3	3.92383e-06	12.9737	no
TMCO6	3.93647e-06	-12.9719	no
EGLN1	3.99708e-06	-12.9631	no
PSENEN	4.16523e-06	-12.9394	yes
FTL	4.18784e-06	-12.9362	no
PLEKHM2	4.18962e-06	-12.936	no
HSP90AA1	4.29873e-06	12.9212	no
GNAQ	4.36285e-06	-12.9126	no
LY6G6F	4.37574e-06	-12.9109	no
TRAPPC2L	4.38137e-06	12.9102	no
EBLN2	4.39736e-06	-12.9081	no
THBD	4.42344e-06	-12.9046	no
SNCA	4.44272e-06	12.9021	yes
GBAS	4.55943e-06	12.8871	no
ADAM17	4.65788e-06	-12.8748	no
SRSF7	4.68855e-06	12.871	no
MBP	4.69579e-06	-12.8701	no
STEAP4	4.73548e-06	-12.8652	no
C12ORF29	4.77552e-06	12.8603	no
SLC25A44	4.80985e-06	-12.8561	no
MAP4K4	4.81237e-06	-12.8558	no
CXCL10	4.82018e-06	12.8549	yes
NDUFAF4	4.82054e-06	12.8549	no
TECPR1	4.83098e-06	-12.8536	no
APH1B	4.87184e-06	-12.8487	no
NSUN7	4.88714e-06	-12.8469	no
LATS2	4.99869e-06	-12.8338	no
C10ORF47	5.00757e-06	-12.8328	no
STARD3	5.02785e-06	-12.8304	no
NFYC	5.06441e-06	-12.8262	no
LRRFIP1	5.07619e-06	-12.8248	no
MKRN1	5.10647e-06	12.8214	yes
GNB1	5.21018e-06	-12.8097	no
LINC00483	5.22009e-06	12.8086	no
RECQL	5.22977e-06	12.8075	no
LPP	5.81961e-06	-12.7451	no
RBM17	5.85618e-06	12.7414	no
TNFRSF1B	5.91313e-06	-12.7358	no
TLR4	6.12319e-06	-12.7153	no
COPE	6.33922e-06	-12.695	no
ANXA11	6.34972e-06	-12.694	no
ACTR10	6.51125e-06	12.6792	no
SLC7A5P2	6.58481e-06	-12.6726	no
TRIB1	6.58754e-06	-12.6724	no
MYO7B	6.71804e-06	-12.6608	no
MYBPC3	6.87819e-06	-12.647	no
AKAP13	6.94494e-06	-12.6413	no
LRCH4	7.00371e-06	-12.6363	no
B3GNTL1	7.0038e-06	-12.6363	no
TUBB1	7.03132e-06	-12.634	no
MYBPH	7.1385e-06	-12.625	no
HIST1H2BD	7.18757e-06	-12.621	yes
TPRG1L	7.19858e-06	-12.6201	no
CLDND1	7.2046e-06	12.6196	no
MAPRE3	7.27236e-06	-12.6141	no
KIAA1024	7.28199e-06	12.6133	no
YEATS4	7.4816e-06	12.5973	no
CTNNA1	7.49209e-06	-12.5965	no
PCIF1	7.52837e-06	-12.5936	no
TMEM209	7.71959e-06	12.5787	no
ATAD1	7.88691e-06	12.566	no
NCSTN	7.96834e-06	-12.5599	yes
KANK2	8.11445e-06	12.5491	yes
LCP1	8.16921e-06	-12.5451	no
DYNC1I2	8.18588e-06	12.5439	no
HSPH1	8.25572e-06	12.5389	no
STK4	8.29478e-06	-12.5361	no
MCL1	8.29856e-06	-12.5358	no
LOC283070	8.40746e-06	-12.528	no
RPL13	8.41584e-06	12.5275	no
IKBIP	8.41771e-06	-12.5273	no
COIL	8.41789e-06	12.5273	no
CBL	8.43247e-06	-12.5263	no
PBX2	8.48998e-06	-12.5222	no
PIGY	8.90504e-06	12.4938	no
CGRRF1	8.92615e-06	12.4924	no
PATL1	9.39851e-06	-12.4616	no
IRS2	9.54041e-06	-12.4526	yes
FAM136A	9.5697e-06	12.4508	no
MLL4	9.58218e-06	-12.45	no
TRAPPC2P1	9.60454e-06	12.4486	no
IMPA2	9.73576e-06	-12.4405	no
TMEM71	9.90052e-06	-12.4304	no
CSK	9.91414e-06	-12.4296	no
HACL1	9.92253e-06	12.4291	no
MRFAP1L1	9.93694e-06	12.4282	no
TAP2	9.9541e-06	-12.4272	no
CD2BP2	1.00031e-05	-12.4242	no
NTRK1	1.00181e-05	-12.4233	no
RAD51C	1.00819e-05	12.4195	no
VSIG8	1.00855e-05	-12.4193	no
S100A4	1.01439e-05	-12.4158	no
CLEC4A	1.01869e-05	12.4133	no
LOC113230	1.02533e-05	-12.4094	no
FUT7	1.03146e-05	-12.4058	no
ARHGAP1	1.04108e-05	-12.4002	no
UBTD1	1.0464e-05	-12.3972	no
MYL6B	1.05214e-05	12.3939	no
ACTL6A	1.07469e-05	12.3811	no
WDR7	1.0786e-05	12.3789	no
ANKRD49	1.07902e-05	12.3787	no
STAMBPL1	1.0827e-05	12.3767	no
NOC3L	1.08862e-05	12.3734	no
TOMM70A	1.09164e-05	12.3717	no
SPINK2	1.10327e-05	12.3653	no
SLC14A1	1.11032e-05	12.3615	yes
SRPRB	1.11225e-05	12.3604	no
CREBBP	1.1152e-05	-12.3588	no
MLL5	1.11564e-05	-12.3586	yes
SLC6A9	1.11833e-05	12.3572	yes
GRAMD4	1.12296e-05	-12.3547	yes
MIA3	1.12305e-05	-12.3546	no
RIOK3	1.12314e-05	12.3546	yes
ABCE1	1.12791e-05	12.352	no
PHF12	1.13212e-05	-12.3498	yes
CBX6	1.13358e-05	-12.349	no
UNC50	1.13971e-05	12.3457	no
CRIPT	1.14268e-05	12.3442	no
PHF21A	1.14383e-05	-12.3435	no
C2ORF88	1.14558e-05	12.3426	yes
UBE2T	1.15493e-05	12.3377	no
CCDC14	1.15776e-05	12.3362	no
CDS2	1.16371e-05	-12.3331	no
KAZN	1.16557e-05	-12.3322	no
HMBS	1.17785e-05	12.3258	yes
RAB40C	1.18789e-05	-12.3207	no
VDAC3	1.18821e-05	12.3205	no
CPEB2	1.19025e-05	-12.3195	yes
SEMA3E	1.19135e-05	-12.319	no
CSF2RA	1.19968e-05	-12.3147	no
DIRC2	1.20659e-05	-12.3113	no
GAA	1.20948e-05	-12.3098	no
PPP1CA	1.22768e-05	-12.3008	yes
ROCK2	1.22969e-05	-12.2998	no
ABHD5	1.23032e-05	-12.2995	no
DEDD2	1.23128e-05	-12.299	no
UBE2V1	1.237e-05	12.2962	no
CDK5R1	1.23891e-05	-12.2953	no
SEC14L1	1.25301e-05	-12.2884	no
EXOSC8	1.25474e-05	12.2876	no
SUCLA2	1.27983e-05	12.2756	no
RPL21P44	1.29033e-05	-12.2706	no
MTX3	1.3083e-05	12.2622	no
NR3C1	1.31921e-05	12.2571	no
DLEU1	1.33136e-05	12.2516	no
UBE2N	1.33505e-05	12.2499	no
RAVER1	1.33634e-05	-12.2493	no
RSRC1	1.35224e-05	12.2421	no
PCBP1	1.37718e-05	-12.231	no
SRP9	1.40141e-05	12.2204	no
MPHOSPH10	1.4073e-05	12.2178	no
FAM131A	1.41432e-05	-12.2148	no
TRIM10	1.44375e-05	12.2022	yes
GSDMD	1.45159e-05	-12.1989	no
GPR183	1.45724e-05	12.1965	no
RELA	1.46121e-05	-12.1949	no
FAM110A	1.46163e-05	-12.1947	no
CCDC58	1.49393e-05	12.1813	no
TMEM179B	1.50916e-05	-12.1751	no
BCL2	1.51074e-05	12.1745	no
ARID5B	1.52165e-05	12.1701	no
NFIL3	1.54178e-05	-12.162	no
C9ORF78	1.57815e-05	12.1477	no
TMPRSS9	1.58143e-05	12.1465	no
C9ORF123	1.59e-05	12.1432	no
MEFV	1.5914e-05	-12.1426	no
NUP153	1.5957e-05	-12.141	no
ARL11	1.60432e-05	-12.1377	no
HLA-E	1.61328e-05	-12.1342	no
BCL2L1	1.64068e-05	12.1239	no
TFDP1	1.65863e-05	12.1172	yes
DDX55	1.66381e-05	12.1153	no
WBP2	1.6692e-05	-12.1133	no
TMX1	1.68147e-05	12.1088	no
STAT5B	1.70907e-05	-12.0988	no
CCDC97	1.7561e-05	-12.0821	no
PRDX2	1.77433e-05	12.0757	no
MRPS24	1.77504e-05	12.0755	no
CCT8	1.8091e-05	12.0637	no
MRPS30	1.81778e-05	12.0608	no
SF3B5	1.82529e-05	12.0582	no
LIMK2	1.82887e-05	-12.057	yes
SQLE	1.82944e-05	12.0568	no
OXER1	1.82986e-05	-12.0567	no
OTX1	1.83467e-05	-12.0551	no
KRT1	1.85616e-05	12.0479	yes
IFNAR2	1.8581e-05	-12.0472	yes
ATF6	1.89251e-05	-12.0359	no
CR1	1.89915e-05	-12.0337	no
SELENBP1	1.93853e-05	12.021	yes
B4GALT5	1.9414e-05	-12.0201	no
NUCB2	1.95713e-05	12.0151	no
PCID2	1.97393e-05	12.0098	no
SDF4	1.9815e-05	-12.0074	no
PI3	2.00598e-05	-11.9998	no
ZBED1	2.01256e-05	-11.9978	no
ZMYND11	2.02741e-05	11.9932	no
CYP2R1	2.02986e-05	11.9925	no
C2ORF68	2.042e-05	-11.9888	no
NSMCE2	2.04719e-05	11.9872	no
NDUFA8	2.05758e-05	11.984	no
TUBA1A	2.07125e-05	-11.9799	no
RSC1A1	2.10785e-05	11.969	no
YIPF1	2.11018e-05	-11.9684	no
SAAL1	2.11843e-05	11.9659	no
HBG2	2.12276e-05	11.9647	no
RBM33	2.12337e-05	-11.9645	no
DARS	2.14785e-05	11.9573	yes
CEACAM1	2.1596e-05	-11.9539	yes
SNRPB2	2.16276e-05	11.953	no
EPS15L1	2.20387e-05	-11.9413	no
ARRB1	2.21093e-05	-11.9393	no
LRP10	2.21399e-05	-11.9385	no
PRKRIR	2.23419e-05	11.9328	no
TRIM38	2.25984e-05	-11.9257	no
RAC1	2.26541e-05	-11.9241	no
MARCKS	2.26843e-05	-11.9233	no
IL3RA	2.2744e-05	-11.9217	no
RPL22	2.30829e-05	11.9124	yes
RCN3	2.36064e-05	-11.8984	no
CCNG2	2.36107e-05	-11.8983	no
SCOC	2.37334e-05	11.895	no
SMPDL3A	2.37943e-05	-11.8934	no
RFC4	2.38273e-05	11.8926	no
SLC7A1	2.38919e-05	11.8909	no
MON1B	2.41375e-05	-11.8845	no
ILK	2.43664e-05	-11.8786	no
UBE2O	2.43741e-05	11.8784	no
TAOK2	2.45681e-05	-11.8734	no
SLC11A2	2.49283e-05	11.8643	no
CD300LB	2.50513e-05	-11.8612	no
LGALS14	2.50872e-05	11.8603	no
BAIAP2	2.51356e-05	-11.8591	no
KIAA0020	2.51481e-05	11.8588	no
FAM117B	2.5375e-05	11.8531	no
NSUN3	2.53825e-05	11.8529	no
PDZD8	2.58131e-05	-11.8424	no
ARHGEF2	2.61054e-05	-11.8353	no
H2AFY	2.62216e-05	-11.8325	no
SAMD9L	2.63494e-05	-11.8295	yes
RELB	2.6458e-05	-11.8269	no
FBXO5	2.70257e-05	11.8135	no
SAMD4B	2.7181e-05	-11.8099	no
YARS2	2.72572e-05	-11.8081	no
ZNF280D	2.72614e-05	11.808	no
SC5DL	2.74595e-05	11.8035	no
PTPLAD1	2.79158e-05	11.7931	no
SLC23A2	2.83971e-05	-11.7823	no
MSI2	2.86231e-05	11.7773	yes
HPGD	2.87087e-05	-11.7754	no
JUN	2.88825e-05	-11.7716	no
TRAPPC4	2.90304e-05	11.7684	no
EIF4A3	2.91712e-05	-11.7653	no
TRIM58	2.91861e-05	11.765	yes
RIPK1	2.95515e-05	-11.7571	no
BPNT1	2.9876e-05	11.7502	no
PIK3R5	3.00956e-05	-11.7456	no
UBE3A	3.03968e-05	11.7393	no
SAP30BP	3.08073e-05	-11.7308	no
FHOD1	3.11004e-05	-11.7247	no
STRADB	3.13216e-05	11.7203	yes
2009-09-01	3.14186e-05	-11.7183	no
FAAH	3.14288e-05	-11.7181	no
SPINT2	3.14623e-05	-11.7174	no
PPP2R5C	3.15293e-05	11.7161	no
TNFRSF9	3.15524e-05	-11.7156	no
NOL8	3.16425e-05	11.7138	no
TSPO	3.18365e-05	-11.7099	no
AKR1D1	3.21504e-05	-11.7037	no
CCBE1	3.22724e-05	-11.7013	no
STRADA	3.23522e-05	-11.6997	no
PRCC	3.2452e-05	-11.6977	no
ZNF438	3.24607e-05	-11.6976	no
PSMF1	3.31595e-05	11.684	no
TNK2	3.34006e-05	-11.6794	no
PTGS2	3.35891e-05	-11.6758	yes
KIF20B	3.37938e-05	11.6719	no
ABCA7	3.40502e-05	-11.6671	no
ARSA	3.42534e-05	-11.6633	no
MARK2	3.46064e-05	-11.6568	no
GSTO1	3.48846e-05	11.6517	yes
CNOT6	3.49091e-05	11.6512	no
ITGB5	3.51455e-05	-11.6469	no
RPL10A	3.52942e-05	11.6442	no
KARS	3.5313e-05	11.6439	no
CD82	3.53245e-05	-11.6437	no
TRAPPC1	3.55393e-05	-11.6398	no
FBXL20	3.56043e-05	-11.6387	no
PFDN1	3.6362e-05	11.6252	no
VAMP7	3.66906e-05	11.6194	no
GORAB	3.66944e-05	11.6194	no
RPL15	3.74618e-05	11.6061	no
CCDC147	3.75214e-05	-11.6051	no
TSC22D4	3.76953e-05	-11.6021	no
TOPORS	3.77067e-05	-11.602	no
ESD	3.83519e-05	11.5911	no
GPR77	3.84497e-05	-11.5894	no
MGST3	3.85295e-05	11.5881	no
MFSD7	3.87373e-05	-11.5847	no
GFM1	3.91747e-05	11.5775	no
MMADHC	3.93778e-05	11.5741	no
MCOLN3	3.95536e-05	11.5713	yes
MICAL1	3.96005e-05	-11.5705	no
SNORD68	3.96389e-05	11.5699	no
DHRSX	4.00764e-05	-11.5628	no
HAUS4	4.01257e-05	-11.562	no
IRF7	4.02679e-05	-11.5598	no
STAT5A	4.06257e-05	-11.5541	no
GTF2F2	4.09987e-05	11.5482	no
CSTF3	4.12592e-05	11.5441	no
HELQ	4.21129e-05	11.5309	no
LAT2	4.21754e-05	-11.53	yes
SLC26A8	4.26479e-05	-11.5228	no
ENPP2	4.31818e-05	-11.5148	no
LUM	4.37971e-05	-11.5056	no
BHLHE40	4.38261e-05	-11.5052	no
CTNNAL1	4.39733e-05	11.503	yes
E2F2	4.40443e-05	11.502	no
ASNSD1	4.41242e-05	11.5008	no
SLC8A3	4.42183e-05	-11.4994	no
FMNL1	4.44896e-05	-11.4955	no
TAGAP	4.47492e-05	-11.4917	no
HSCB	4.48578e-05	11.4902	no
PIGB	4.49774e-05	-11.4884	no
CD36	4.51691e-05	11.4857	no
HS1BP3	4.5303e-05	-11.4838	no
RANBP1	4.6087e-05	11.4727	no
TMEM237	4.65288e-05	11.4665	no
CRYZ	4.69583e-05	11.4605	no
CCND3	4.70145e-05	-11.4598	no
MRPL54	4.71578e-05	11.4578	no
STX5	4.74675e-05	-11.4535	no
CD53	4.76023e-05	-11.4517	no
TMOD1	4.77106e-05	11.4502	yes
RNPEP	4.80376e-05	-11.4458	no
ZNF25	4.86592e-05	11.4374	no
LCN2	4.89261e-05	11.4339	yes
TRIM11	4.91786e-05	-11.4305	no
DOK3	4.945e-05	-11.427	no
COX4I1	4.96336e-05	11.4246	no
FAM13A	4.98654e-05	11.4215	no
TMEM167A	4.99105e-05	11.4209	no
SFXN4	4.99247e-05	11.4208	no
DHRS7B	5.06518e-05	-11.4113	no
CNNM3	5.08505e-05	-11.4088	no
NDUFV2	5.0899e-05	11.4082	no
TRIM27	5.10333e-05	-11.4065	no
CTRL	5.14114e-05	-11.4017	no
CHMP1B	5.149e-05	-11.4007	no
TNFAIP6	5.18577e-05	-11.396	no
ALDH5A1	5.27228e-05	11.3852	no
SLC22A4	5.28434e-05	-11.3837	no
TMEM116	5.47213e-05	11.3609	no
SUGT1	5.4933e-05	11.3584	no
SNX4	5.54623e-05	11.3521	no
TBCE	5.55308e-05	11.3513	no
BCDIN3D	5.56358e-05	11.3501	no
LZTR1	5.59971e-05	-11.3459	no
FAM162A	5.60254e-05	11.3455	no
MANBA	5.63115e-05	-11.3422	no
TGM3	5.65563e-05	-11.3394	no
TP53INP1	5.66299e-05	-11.3385	yes
CD48	5.7013e-05	11.3341	no
PPCDC	5.79157e-05	-11.3238	no
RNF135	5.86745e-05	-11.3153	yes
STRN4	5.87091e-05	-11.3149	no
NLRP3	5.8719e-05	-11.3148	no
SMAD3	5.87549e-05	11.3144	no
FBRS	5.8819e-05	-11.3136	no
ARFGAP1	5.90366e-05	-11.3112	no
OBFC1	5.97689e-05	11.3031	no
PTS	5.9854e-05	11.3022	no
PRR24	6.05081e-05	-11.295	no
BLOC1S1	6.05752e-05	11.2943	no
TSPAN5	6.08683e-05	11.2911	no
FBXO9	6.10353e-05	11.2893	no
DHRS12	6.13538e-05	-11.2859	no
CTRC	6.18416e-05	-11.2807	no
HENMT1	6.18675e-05	11.2804	no
SPTA1	6.22434e-05	11.2764	no
ACSM3	6.22696e-05	11.2762	no
RBM38	6.23639e-05	11.2752	yes
DTX2	6.34629e-05	-11.2637	no
ICOS	6.36187e-05	11.2621	no
GSK3B	6.36453e-05	-11.2618	yes
ENTPD1	6.38288e-05	-11.2599	no
TAX1BP1	6.40634e-05	11.2575	no
ARHGEF11	6.4085e-05	-11.2572	no
ACSL5	6.41416e-05	11.2567	no
LIMD2	6.41916e-05	-11.2561	no
LMF2	6.50896e-05	-11.247	no
PRIM1	6.53085e-05	11.2448	no
NUP88	6.58022e-05	11.2398	no
FAHD1	6.59726e-05	11.2381	no
CHFR	6.61349e-05	-11.2365	no
STARD10	6.67874e-05	-11.23	no
C1ORF38	6.7094e-05	-11.2269	no
CASP4	6.71804e-05	-11.2261	yes
GPR108	6.73185e-05	-11.2247	no
BABAM1	6.7346e-05	11.2245	no
SOLH	6.74336e-05	-11.2236	no
CEBPZ	6.75568e-05	11.2224	no
IGF1R	6.7797e-05	-11.2201	no
ZNF18	6.82469e-05	-11.2157	no
CYP4F3	6.82724e-05	-11.2154	no
TRA2B	6.89196e-05	11.2092	no
OSBP2	6.91104e-05	11.2074	no
KATNA1	7.03247e-05	11.1958	no
HAT1	7.05451e-05	11.1937	no
RHOQ	7.08487e-05	-11.1909	no
ARF3	7.08892e-05	-11.1905	no
KCNJ2	7.13497e-05	-11.1862	yes
TXNRD1	7.17245e-05	-11.1827	no
RNF11	7.29645e-05	11.1714	yes
HSPA14	7.40944e-05	11.1612	no
LYPLAL1	7.48457e-05	11.1544	no
PPIL3	7.53881e-05	11.1496	no
BCL10	7.59589e-05	-11.1446	no
NFKBIA	7.62004e-05	-11.1425	yes
C9ORF80	7.66846e-05	11.1383	no
VDR	7.72198e-05	-11.1337	no
ADCY4	7.74732e-05	-11.1315	no
ADAM7	7.78402e-05	11.1283	no
SRSF4	7.85732e-05	-11.1221	no
LSMD1	7.86908e-05	11.1211	no
LOC285593	7.98297e-05	11.1115	no
ZNF341	8.03156e-05	-11.1074	no
BMI1	8.03409e-05	11.1072	no
FAM3C	8.04172e-05	11.1066	no
IGFBP1	8.0541e-05	11.1056	yes
CEACAM4	8.08127e-05	-11.1033	no
PPP1R10	8.12181e-05	-11.1	no
C12ORF60	8.12485e-05	11.0997	no
GALK2	8.13199e-05	11.0991	no
PCNX	8.18029e-05	-11.0952	no
MAPK8IP3	8.20028e-05	-11.0935	no
SF3B2	8.21011e-05	-11.0927	no
SF3B4	8.24006e-05	-11.0903	no
ELF2	8.33071e-05	-11.083	no
HAGH	8.3554e-05	11.081	yes
BRP44	8.36237e-05	11.0805	no
ZNF574	8.40231e-05	-11.0773	no
ZFP36L2	8.43567e-05	-11.0746	no
ZMAT3	8.49275e-05	-11.0701	no
CDHR5	8.50571e-05	11.0691	no
PLEK2	8.53104e-05	11.0671	yes
CTDNEP1	8.602e-05	-11.0615	no
VNN2	8.6245e-05	-11.0598	no
RPL32	8.68541e-05	11.0551	no
LGALS3	8.70331e-05	11.0537	no
TMEM222	8.7154e-05	-11.0527	no
C14ORF129	8.79256e-05	11.0468	no
PLXNC1	8.81154e-05	-11.0454	no
STX11	8.81894e-05	-11.0448	no
NCOA7	8.83254e-05	11.0438	no
GP9	8.90775e-05	-11.0381	no
RARRES3	8.90943e-05	11.038	no
DPY30	8.93741e-05	11.0359	no
PTPN1	8.93861e-05	-11.0358	no
CTIF	8.98444e-05	-11.0323	no
CORO1B	9.03012e-05	-11.0289	no
UNC93B1	9.0473e-05	-11.0276	no
ECHDC3	9.10114e-05	-11.0237	yes
PPP1R3B	9.11294e-05	-11.0228	yes
NDUFA9	9.15197e-05	11.0199	no
DNM2	9.20128e-05	-11.0163	no
EDEM2	9.38275e-05	-11.0031	no
RYR3	9.3887e-05	-11.0027	no
STAT4	9.43392e-05	10.9995	yes
ZNF813	9.69834e-05	10.9808	no
ZNF260	9.72767e-05	10.9788	no
TMCO3	9.8454e-05	-10.9707	no
EPB42	9.92347e-05	10.9653	no
GMEB1	9.92627e-05	-10.9651	no
C16ORF87	9.94665e-05	10.9637	no
B2M	9.98687e-05	10.961	no
ARHGAP19	0.00010023	-10.9586	no
C14ORF166	0.00010033	10.9579	no
FXN	0.000101806	-10.948	no
SESN1	0.00010206	10.9463	no
C1ORF52	0.000103291	10.9382	no
RAI1	0.000103345	-10.9379	no
RPN1	0.000103546	-10.9365	no
CCDC23	0.000104426	10.9308	no
ODF3B	0.000104588	-10.9298	no
DNASE1L3	0.000104738	10.9288	no
RAPGEFL1	0.000105204	-10.9258	no
TMEM42	0.000105494	10.9239	no
RAB3D	0.000105796	-10.922	no
WIPI1	0.000106077	-10.9202	no
TXNDC9	0.000106481	10.9176	no
SRGN	0.000107453	-10.9114	no
RETN	0.000107585	10.9106	no
HEY1	0.000108527	-10.9047	no
CERS2	0.000109881	-10.8962	no
RAB24	0.000110029	-10.8953	yes
PIGS	0.000110174	-10.8944	no
RNF31	0.000110183	-10.8944	no
C2ORF47	0.000110262	10.8939	no
TNFRSF21	0.000110793	-10.8906	yes
NUP155	0.000111135	10.8885	no
PDLIM5	0.000111661	-10.8853	no
EIF4E3	0.000111917	-10.8837	no
CREG1	0.000112454	10.8805	no
GIN1	0.000113049	10.8769	no
LRRC25	0.000113751	-10.8727	no
CDC123	0.000113772	-10.8726	no
LAMTOR3	0.000113801	10.8724	no
FAM176B	0.000113852	-10.8721	no
AK3	0.000114252	10.8697	no
CREB1	0.000114984	-10.8653	no
EHD1	0.000115025	-10.8651	no
SCAMP4	0.000115098	-10.8647	no
PRPF4B	0.00011652	10.8563	no
ZBTB17	0.000116981	-10.8536	no
SAFB2	0.000119307	-10.8401	no
MCTP2	0.000119324	-10.84	no
DNAJC9	0.00011946	10.8393	no
SLBP	0.00011951	-10.839	no
ATG7	0.000119992	-10.8362	yes
SEC11A	0.000120049	10.8359	no
RFWD2	0.000120505	-10.8333	no
AMD1	0.000121126	-10.8298	no
ZBP1	0.000122167	-10.8239	no
USP14	0.000122633	10.8213	no
LGMN	0.000122797	-10.8204	no
OR2W3	0.000123019	10.8192	no
RNF166	0.000123068	-10.8189	no
SELL	0.000123723	-10.8153	no
CLEC4E	0.000123931	-10.8141	no
PSME1	0.000124171	-10.8128	no
C12ORF32	0.000124631	10.8103	no
PRRC2A	0.000124702	-10.8099	no
CCDC65	0.00012514	10.8075	no
DDHD2	0.000125169	10.8073	no
C19ORF6	0.000125837	-10.8037	no
CCNH	0.000126456	10.8003	no
HMG20B	0.000126684	-10.7991	no
SLC35E3	0.000127323	-10.7956	no
TOMM22	0.000127648	10.7939	no
PPM1M	0.000130687	-10.7777	no
RALA	0.000132299	10.7693	no
SLC35E1	0.000133873	-10.7612	no
SNORD48	0.000134157	10.7597	no
ADCK3	0.000134472	-10.7581	no
LOC81691	0.000134657	-10.7571	no
SNX3	0.000134905	10.7559	no
FLOT1	0.000136614	-10.7472	no
GRN	0.000137708	-10.7417	no
ISG20	0.000137712	-10.7417	no
FBXO46	0.000138158	-10.7395	no
IL10RB	0.000138985	-10.7354	no
BATF	0.000139133	10.7346	no
CCDC109B	0.000139987	10.7304	no
MRPL47	0.00014003	10.7302	no
NUDT2	0.000142241	10.7194	no
BAP1	0.000142358	-10.7188	no
NISCH	0.000142878	-10.7163	no
PTCRA	0.000143219	-10.7146	no
KIAA1191	0.000143466	10.7135	no
ISG20L2	0.000144415	-10.7089	no
SPRED1	0.00014537	10.7043	no
GPN1	0.000145823	10.7022	no
LPCAT3	0.000146425	-10.6993	no
RDX	0.000147421	10.6947	no
HEPACAM2	0.000148069	10.6916	no
KAT8	0.000148449	-10.6898	no
SRSF9	0.000148581	-10.6892	yes
KCTD20	0.000149688	-10.6841	no
SRSF8	0.000149718	10.684	no
XPNPEP3	0.00014974	-10.6838	no
GNPAT	0.000150008	10.6826	no
LRPPRC	0.000150997	10.6781	no
CCR1	0.000151236	-10.677	no
TPGS2	0.000151909	10.6739	yes
LCP2	0.000153664	-10.6659	no
NRGN	0.000154079	-10.664	no
BMPR2	0.000154129	10.6638	no
XRCC6BP1	0.000154201	10.6635	no
GIMAP2	0.000154606	10.6617	no
MMP8	0.000156212	10.6545	yes
ALOX12	0.000156765	-10.652	no
TTC25	0.000157072	10.6507	no
PUM1	0.000157441	-10.6491	no
FBXL13	0.000158115	-10.6461	no
OSGIN2	0.000159608	-10.6396	no
ZCCHC9	0.000159806	10.6387	no
PDCD2	0.000159874	10.6384	no
PI4KB	0.000160023	-10.6378	no
PLD3	0.000160204	-10.637	no
ARMC7	0.000160775	-10.6345	no
PPP3CB	0.00016132	10.6321	no
FUZ	0.000162063	-10.6289	no
ALKBH2	0.000162903	10.6253	no
DHRS7	0.000163594	-10.6224	no
DHX58	0.000163636	-10.6222	no
BTN2A1	0.000165507	-10.6143	no
TNRC18	0.000165713	-10.6134	no
GPSM3	0.000166442	-10.6104	no
TNFRSF10C	0.000168992	-10.5998	no
LPIN2	0.000169835	-10.5963	no
RPL13A	0.000170313	10.5943	no
UBE2Q2	0.000170826	10.5922	no
SLC24A6	0.000170848	-10.5921	no
PTGER2	0.000171874	10.588	no
MEPCE	0.000172263	-10.5864	no
MRPS7	0.000172419	10.5858	no
PIGC	0.000173639	10.5808	no
MRPL34	0.00017462	10.5769	no
NDUFAB1	0.000175211	10.5745	no
FRG1B	0.00017526	10.5743	no
BCL7C	0.000178191	10.5627	no
DCP1A	0.000178833	-10.5602	no
TSPAN9	0.000179665	-10.557	no
KLRF1	0.000182727	10.5451	no
FCN1	0.000183527	-10.5421	no
C19ORF70	0.000183927	10.5405	no
ACRBP	0.000184946	-10.5366	no
F12	0.000185052	-10.5362	no
ZNF839	0.000185778	-10.5335	no
STK24	0.000187949	-10.5253	no
YBEY	0.000188877	10.5219	no
H2AFY2	0.000189163	10.5208	no
OASL	0.000191384	-10.5126	yes
SKAP2	0.000193046	-10.5065	no
MIS12	0.000193658	10.5043	no
SRSF3	0.000193956	10.5032	no
PIK3C2B	0.000194357	-10.5018	no
COL18A1	0.000195663	-10.4971	no
CPT2	0.000196176	-10.4952	no
NRM	0.000198513	-10.4869	no
ZFP161	0.000199735	10.4825	no
CCDC66	0.000200091	10.4813	no
SAFB	0.000200144	-10.4811	no
SIGLEC9	0.000200394	-10.4802	no
SETD2	0.000200463	-10.48	no
INTS3	0.000200763	-10.4789	no
CYP27A1	0.000201861	-10.4751	no
CELF1	0.000202484	-10.4729	no
CNIH4	0.000203596	10.469	no
TOR1AIP1	0.000204649	-10.4654	no
GRB2	0.000204757	-10.465	no
CHMP6	0.000205636	-10.462	yes
CCNK	0.000205682	-10.4618	no
PLDN	0.000209476	10.4489	no
ANKRD11	0.000211062	-10.4436	no
TPST2	0.000212935	-10.4373	no
ZNF571	0.000213683	10.4349	no
RIC8A	0.000216988	-10.424	yes
NRIP1	0.000217128	10.4235	no
RPUSD4	0.000219659	10.4153	no
LRMP	0.000220051	-10.414	no
CCDC88B	0.000220357	-10.4131	no
TLR2	0.000220845	-10.4115	yes
IFIT3	0.000220883	-10.4114	yes
RAD51	0.00022567	10.3961	no
SAMHD1	0.000226267	10.3943	no
PPFIA1	0.000226529	-10.3934	no
SLC35B3	0.0002282	10.3882	no
DNTTIP1	0.000228926	-10.386	no
LIPT1	0.000229309	10.3848	no
DNAJC5	0.000229485	-10.3842	no
NOA1	0.00022971	10.3835	no
ZUFSP	0.000232249	10.3757	no
VASP	0.000232303	-10.3755	no
WIBG	0.000233126	10.373	no
ALKBH3	0.000233486	10.3719	no
GPR27	0.000233914	-10.3706	no
ADPRHL2	0.000234961	-10.3674	no
DEK	0.000235958	10.3644	no
SSBP1	0.00023844	10.357	no
OPLAH	0.00023878	-10.356	no
FKBP1A	0.000239924	-10.3525	no
WDYHV1	0.000240398	10.3511	no
MAP7	0.000241437	-10.3481	no
PHF13	0.000244019	-10.3405	no
IL18BP	0.000244326	-10.3396	no
MED10	0.000244533	10.339	no
TM2D1	0.000244974	10.3377	no
CMTM5	0.000245279	-10.3368	no
ETS2	0.000246528	-10.3332	no
TOP3A	0.000247881	-10.3293	no
C16ORF48	0.000247901	-10.3292	no
SCFD1	0.000247976	10.329	no
PCM1	0.000248147	10.3285	no
FKBP3	0.000249246	10.3253	no
RYBP	0.000255527	-10.3075	no
TMEM104	0.000257063	-10.3032	no
BMS1	0.000258114	10.3003	no
PGM2L1	0.000258606	10.2989	no
CHPT1	0.000258828	10.2983	yes
SBDSP1	0.000259893	10.2954	no
EID1	0.000259981	10.2951	no
ZC3H15	0.00026332	10.286	no
SNRNP25	0.000264194	10.2836	no
TMEM165	0.000266487	10.2774	yes
WRN	0.000266726	10.2768	no
MLX	0.000275636	-10.2531	no
DPAGT1	0.00027586	-10.2526	no
SIN3B	0.000276647	-10.2505	no
SPARC	0.000276863	-10.2499	no
TEF	0.00027814	-10.2466	no
VPS45	0.000279339	10.2435	no
FAM210B	0.000279385	10.2434	no
FEM1B	0.000279585	-10.2429	no
IL37	0.000281452	-10.2381	no
CENPN	0.000281613	10.2377	no
TRMT11	0.000282458	10.2355	no
C17ORF109	0.000283074	10.234	no
ERAP2	0.000283228	-10.2336	no
FAM78A	0.000284284	-10.2309	no
FAM174B	0.000285112	-10.2288	no
C3ORF38	0.000285201	10.2286	no
SHKBP1	0.000286155	-10.2262	no
ITGAE	0.00028666	10.2249	no
NR2C2	0.000287682	-10.2223	no
PEF1	0.000292457	-10.2104	no
IBTK	0.000292659	10.2099	no
PRPF18	0.000293404	10.2081	no
RUFY1	0.000293664	-10.2075	no
ABCC2	0.000294925	-10.2044	no
PFDN6	0.000298837	10.1948	no
CDH2	0.000298967	-10.1945	no
ARL2BP	0.000300018	10.192	no
EIF3F	0.00030008	10.1918	no
SNORD15B	0.000300403	10.1911	no
SCARNA9	0.000301804	10.1877	no
PCBD1	0.000305699	10.1784	no
TMEM14A	0.000305822	10.1781	no
HSPA8	0.000307945	10.1731	no
PNPLA6	0.000308133	-10.1727	no
CA4	0.000309616	-10.1692	no
GRAMD1A	0.000310281	-10.1676	no
RSPH3	0.000313315	-10.1606	no
SLC27A1	0.000313444	-10.1603	no
DDX23	0.000313811	-10.1594	no
RAB27A	0.000315102	-10.1564	no
KCNH3	0.000315346	-10.1559	no
ZNF823	0.000316443	10.1534	no
TAB1	0.000317281	-10.1514	no
BCKDHA	0.000318413	-10.1488	no
ANKRD13A	0.000320212	-10.1447	no
PRDX5	0.000323793	10.1367	no
FAM49A	0.000324961	-10.134	no
ARNTL	0.000326079	-10.1315	no
QPRT	0.000328504	-10.1262	no
C4ORF27	0.000329768	10.1234	no
C7ORF59	0.000329836	-10.1232	no
FBXO7	0.000332255	10.1179	yes
C4ORF52	0.000336677	10.1083	no
SMARCC2	0.00033687	-10.1078	no
TCF4	0.000341133	-10.0987	no
CKLF	0.000341697	10.0975	no
RANBP10	0.00034544	10.0895	no
ZNF302	0.000346502	10.0873	no
BCL2L12	0.000346924	-10.0864	no
LRRC29	0.000348254	-10.0836	yes
MTMR3	0.000349288	-10.0814	no
C6ORF162	0.000349998	10.0799	no
ZWILCH	0.000350928	10.078	no
ISCA2	0.000352404	10.0749	no
GYPA	0.000354897	10.0698	no
CYB5A	0.000356057	10.0674	no
FAM212A	0.000358304	-10.0628	no
HLA-F	0.000358595	-10.0622	no
TNS1	0.000365064	10.0491	no
POFUT2	0.00036917	-10.0409	no
ELOVL6	0.000370868	10.0375	no
TCF25	0.000372066	-10.0351	no
TRIM14	0.000373403	-10.0325	no
PIP5K1C	0.000376175	-10.0271	no
NAP1L4	0.000382211	10.0154	no
POLR3C	0.000382276	10.0153	no
RLN1	0.000382338	10.0151	no
DNAJC19	0.000383198	10.0135	no
CADM4	0.00038332	-10.0132	no
ADAM21	0.000386561	10.0071	no
OAF	0.000387518	-10.0052	no
DUS4L	0.000388205	10.0039	no
CD63	0.000390888	-9.99886	no
RRM1	0.000394902	9.99133	no
DYNLT1	0.000395043	9.99107	no
ARPC5L	0.000399323	9.98312	yes
FAM193B	0.000399388	-9.98301	no
MTFR1	0.000399878	9.9821	no
PPP1R14B	0.000402101	-9.97801	no
WRAP73	0.000403476	-9.97549	no
BRD7	0.000404485	-9.97365	no
DDX18	0.000404495	9.97363	no
GCM1	0.000405303	-9.97216	no
API5	0.000405924	9.97103	no
PLIN5	0.000406042	-9.97081	no
NUCB1	0.000406869	-9.96931	no
SMAD5	0.000411435	9.96107	no
ZNF549	0.000411792	-9.96043	no
PSMB7	0.00041269	9.95882	no
PDHB	0.000415493	9.95381	no
UBE2D4	0.000416037	9.95284	no
TTC13	0.000416152	9.95264	no
SNAI3	0.000416418	-9.95217	no
ERGIC3	0.000418574	9.94835	no
RNF125	0.000418696	9.94813	no
HNRNPU	0.000420203	9.94547	no
NIN	0.000420435	-9.94506	no
SETD1B	0.000421468	-9.94325	no
LILRB2	0.000421543	-9.94312	no
MRPS14	0.000431777	9.92535	no
LOC374443	0.000432435	9.92422	no
LINC00174	0.000435075	-9.9197	no
PIGN	0.000440638	9.91027	no
ECE1	0.000441524	-9.90878	no
SGPL1	0.000443109	-9.90612	no
BAZ1A	0.00044485	-9.90321	no
ZNHIT6	0.000445098	9.90279	no
SEC61A2	0.000446982	-9.89966	no
CCNC	0.00044869	9.89682	no
TTPAL	0.000448855	-9.89655	no
COX6B1	0.000450585	9.89369	no
CCDC25	0.000452259	9.89093	no
INSIG2	0.000452737	9.89014	no
ZCCHC7	0.000455788	9.88515	no
RPL3	0.000459386	9.8793	no
PLXDC2	0.000466254	-9.86824	no
IFNAR1	0.000466388	-9.86803	yes
PDCL3	0.000467547	9.86618	no
EPG5	0.000470484	-9.86151	no
KCNK6	0.000471172	-9.86042	no
CHCHD7	0.00047244	9.85841	no
TM2D2	0.000475437	9.85369	no
ATXN7L3	0.000481822	-9.84373	no
VPS39	0.000489035	-9.83263	no
TCEANC2	0.000489384	-9.83209	no
ZCCHC17	0.00049188	9.82829	no
CYP4V2	0.000493335	9.82608	no
ANAPC4	0.000493914	9.8252	no
TNFRSF14	0.000494069	-9.82497	no
TLN2	0.000496865	9.82074	no
ABCC5	0.000500928	-9.81464	no
SUPT4H1	0.000502571	-9.81219	no
CLCN7	0.000503361	-9.81101	no
NFKB2	0.000503569	-9.8107	no
CD46	0.000505071	-9.80847	no
SMCHD1	0.000505185	-9.8083	no
OLFM4	0.000506061	9.807	no
P2RX1	0.000508121	-9.80396	no
KPNA5	0.000508708	9.80309	no
NUP54	0.000514462	9.79466	no
ZNF335	0.000514757	-9.79423	no
LAIR1	0.000517304	-9.79052	no
KLHL7	0.00051996	9.78668	no
JMJD1C	0.000524392	-9.7803	no
CYFIP2	0.000525338	9.77894	no
AHCYL1	0.000526237	-9.77766	no
VCL	0.000526837	-9.7768	no
VIPR1	0.000527513	-9.77584	no
C18ORF32	0.000527839	9.77537	no
SND1-IT1	0.000528108	-9.77499	yes
SH2D3C	0.000528156	-9.77492	no
SLC40A1	0.000530308	-9.77187	no
SLC38A10	0.000535154	-9.76502	no
MYL12B	0.000536141	9.76364	no
RPL36	0.000536781	9.76274	yes
AFF1	0.000540646	-9.75734	no
CLPTM1	0.000541851	-9.75566	no
ZNF800	0.000542949	9.75413	no
ZNF137P	0.000543838	-9.7529	no
NOL11	0.000545365	9.75079	no
COPS2	0.000545935	9.75	no
BTG3	0.000551027	9.743	no
ATG4C	0.000552312	9.74125	no
PSMD14	0.000554142	9.73875	no
COASY	0.00055429	-9.73855	no
GOLGA2	0.000554803	-9.73785	no
KLRG1	0.000557667	9.73397	no
AEN	0.000560001	9.73082	no
MRC2	0.000563816	9.72569	no
SLTM	0.000566643	9.72191	no
RABIF	0.000569701	-9.71784	no
TTLL4	0.000571122	-9.71596	no
EPB41	0.000572762	9.71379	yes
RRM2B	0.000574228	-9.71186	no
GADD45B	0.000574541	-9.71145	no
HMGCS1	0.000575078	9.71074	no
C17ORF56	0.000575095	-9.71072	no
NAGK	0.000576342	-9.70908	no
BUD31	0.000578883	9.70575	no
[truncated: 14,781 more rows]
